# Supplementary material for: Mapping Floral Genetic Architecture in Prunus mume, an Ornamental Woody Plant
Source: Frontiers journal article supplement (doi:10.3389/fpls.2022.828579), 2022-02-08
Supplement: Table_2.XLS [file Table_2.XLS]

## Sheet: A-Floral Diameter
PmID	PmPosition	gene	GENE_num	GENE	GO_num	GO	KEGG
Pa2	20290119	Pm006942	5	IPR000225; Armadillo IPR003613; U box domain IPR011989; Armadillo-like helical IPR013083; Zinc finger, RING/FYVE/PHD-type IPR016024; Armadillo-type fold	5	GO:0000151; ubiquitin ligase complex; Cellular Component GO:0004842; ubiquitin-protein ligase activity; Molecular Function GO:0005488; binding; Molecular Function GO:0005515; protein binding; Molecular Function GO:0016567; protein ubiquitination; Biological Process	hypothetical protein; K08332 vacuolar protein 8
Pa2	20290119	Pm006943	NA	NA	NA	NA	NA
Pa2	20617955	Pm006987	NA	NA	NA	NA	hypothetical protein; K14308 nuclear pore complex protein Nup54
Pa2	20617955	Pm006988	4	IPR001810; F-box domain, cyclin-like IPR006652; Kelch repeat type 1 IPR015916; Galactose oxidase, beta-propeller IPR022364; F-box domain, Skp2-like	1	GO:0005515; protein binding; Molecular Function	hypothetical protein; K10455 kelch-like protein 18
Pa2	21006161	Pm007042	1	IPR003657; DNA-binding WRKY	3	GO:0003700; sequence-specific DNA binding transcription factor activity; Molecular Function GO:0043565; sequence-specific DNA binding; Molecular Function GO:0045449; regulation of transcription; Biological Process	hypothetical protein; K13424 WRKY transcription factor 33
Pa2	21006161	Pm007043	NA	NA	NA	NA	NA
Pa2	21528800	Pm007113	2	IPR001471; Pathogenesis-related transcriptional factor/ERF, DNA-binding IPR016177; DNA-binding, integrase-type	3	GO:0003677; DNA binding; Molecular Function GO:0003700; sequence-specific DNA binding transcription factor activity; Molecular Function GO:0006355; regulation of transcription, DNA-dependent; Biological Process	hypothetical protein LOC100244684; K09286 EREBP-like factor
Pa2	21528800	Pm007114	6	IPR000225; Armadillo IPR001841; Zinc finger, RING-type IPR003613; U box domain IPR011989; Armadillo-like helical IPR013083; Zinc finger, RING/FYVE/PHD-type IPR016024; Armadillo-type fold	6	GO:0000151; ubiquitin ligase complex; Cellular Component GO:0004842; ubiquitin-protein ligase activity; Molecular Function GO:0005488; binding; Molecular Function GO:0005515; protein binding; Molecular Function GO:0008270; zinc ion binding; Molecular Function GO:0016567; protein ubiquitination; Biological Process	zgc:158653; K12030 tripartite motif-containing protein 62
Pa2	23631056	Pm007351	4	IPR005067; Fatty acid desaturase, type 2 IPR005803; Stearoyl-ACP desaturase, conserved site IPR009078; Ferritin/ribonucleotide reductase-like IPR012348; Ribonucleotide reductase-related	6	GO:0006631; fatty acid metabolic process; Biological Process GO:0006633; fatty acid biosynthetic process; Biological Process GO:0016491; oxidoreductase activity; Molecular Function GO:0045300; acyl-[acyl-carrier-protein] desaturase activity; Molecular Function GO:0046914; transition metal ion binding; Molecular Function GO:0055114; oxidation-reduction process; Biological Process	Stearoy-ACP desaturase (EC:1.14.19.2); K03921 acyl-[acyl-carrier-protein] desaturase [EC:1.14.19.2]
Pa2	23631056	Pm007352	1	IPR004330; Transcription factor, FAR1-related	NA	NA	NA
Pa2	24149316	Pm007377	NA	NA	NA	NA	NA
Pa2	24149316	Pm007378	3	IPR001611; Leucine-rich repeat IPR002088; Protein prenyltransferase, alpha subunit IPR008940; Protein prenyltransferase	3	GO:0005515; protein binding; Molecular Function GO:0008318; protein prenyltransferase activity; Molecular Function GO:0018342; protein prenylation; Biological Process	hypothetical protein; K14050 geranylgeranyl transferase type-2 subunit alpha [EC:2.5.1.60]
Pa2	24438405	Pm007398	5	IPR002421; 5'-3' exonuclease, N-terminal IPR008918; Helix-hairpin-helix motif, class 2 IPR020045; 5'-3' exonuclease, C-terminal subdomain IPR020046; 5'-3' exonuclease, alpha-helical arch, N-terminal IPR020047; 5'-3' exonuclease, SAM-fold domain	3	GO:0003677; DNA binding; Molecular Function GO:0003824; catalytic activity; Molecular Function GO:0008409; 5'-3' exonuclease activity; Molecular Function	DNA polymerase I (POL I); K02335 DNA polymerase I [EC:2.7.7.7]
Pa2	24438405	Pm007399	1	IPR001753; Crotonase, core	2	GO:0003824; catalytic activity; Molecular Function GO:0008152; metabolic process; Biological Process	Enoyl-CoA hydratase, mitochondrial precursor, putative (EC:4.2.1.17); K05605 3-hydroxyisobutyryl-CoA hydrolase [EC:3.1.2.4]
Pa2	26403405	Pm007595	NA	NA	NA	NA	hypothetical protein; K14311 nuclear pore complex protein Nup188
Pa2	27324759	Pm007681	9	IPR000719; Protein kinase, catalytic domain IPR001611; Leucine-rich repeat IPR002290; Serine/threonine-protein kinase domain IPR003591; Leucine-rich repeat, typical subtype IPR008266; Tyrosine-protein kinase, active site IPR011009; Protein kinase-like domain IPR017441; Protein kinase, ATP binding site IPR017442; Serine/threonine-protein kinase-like domain IPR020635; Tyrosine-protein kinase, catal…	6	GO:0004672; protein kinase activity; Molecular Function GO:0004674; protein serine/threonine kinase activity; Molecular Function GO:0004713; protein tyrosine kinase activity; Molecular Function GO:0005515; protein binding; Molecular Function GO:0005524; ATP binding; Molecular Function GO:0006468; protein phosphorylation; Biological Process	hypothetical protein; K13420 LRR receptor-like serine/threonine-protein kinase FLS2 [EC:2.7.11.1]
Pa2	29270471	Pm007895	1	IPR013216; Methyltransferase type 11	2	GO:0008152; metabolic process; Biological Process GO:0008168; methyltransferase activity; Molecular Function	Ece2, 1810009K13Rik, 6330509A19Rik, 9630025D12Rik, BB127715, MGC144385, MGC144386; endothelin converting enzyme 2 (EC:3.4.24.71); K01415 endothelin-converting enzyme [EC:3.4.24.71]
Pa2	29768387	Pm007952	5	IPR003663; Sugar/inositol transporter IPR005828; General substrate transporter IPR005829; Sugar transporter, conserved site IPR016196; Major facilitator superfamily, general substrate transporter IPR020846; Major facilitator superfamily	6	GO:0005215; transporter activity; Molecular Function GO:0006810; transport; Biological Process GO:0016020; membrane; Cellular Component GO:0016021; integral to membrane; Cellular Component GO:0022891; substrate-specific transmembrane transporter activity; Molecular Function GO:0055085; transmembrane transport; Biological Process	SLC2A5; solute carrier family 2 (facilitated glucose/fructose transporter), member 5; K08143 MFS transporter, SP family, solute carrier family 2 (facilitated glucose/fructose transporter), member 5
Pa2	29768387	Pm007953	4	IPR003663; Sugar/inositol transporter IPR005828; General substrate transporter IPR016196; Major facilitator superfamily, general substrate transporter IPR020846; Major facilitator superfamily	6	GO:0005215; transporter activity; Molecular Function GO:0006810; transport; Biological Process GO:0016020; membrane; Cellular Component GO:0016021; integral to membrane; Cellular Component GO:0022891; substrate-specific transmembrane transporter activity; Molecular Function GO:0055085; transmembrane transport; Biological Process	DEHA2C11374p; K08139 MFS transporter, SP family, sugar:H+ symporter
Pa2	30185263	Pm008006	3	IPR001461; Peptidase A1 IPR009007; Peptidase aspartic, catalytic IPR021109; Peptidase aspartic	2	GO:0004190; aspartic-type endopeptidase activity; Molecular Function GO:0006508; proteolysis; Biological Process	aspartyl protease family protein; K00924 [EC:2.7.1.-]
Pa2	30185263	Pm008007	3	IPR001461; Peptidase A1 IPR009007; Peptidase aspartic, catalytic IPR021109; Peptidase aspartic	2	GO:0004190; aspartic-type endopeptidase activity; Molecular Function GO:0006508; proteolysis; Biological Process	NA
Pa2	30497134	Pm008045	NA	NA	NA	NA	NA
Pa2	30497134	Pm008046	1	IPR006214; Inhibitor of apoptosis-promoting Bax1-related	NA	NA	hypothetical protein; K06890
Pa2	31251921	Pm008147	NA	NA	NA	NA	NA
Pa2	31251921	Pm008148	6	IPR001005; SANT domain, DNA binding IPR009057; Homeodomain-like IPR010561; DIRP IPR012287; Homeodomain-related IPR014778; Myb, DNA-binding IPR017884; SANT, eukarya	3	GO:0003677; DNA binding; Molecular Function GO:0005515; protein binding; Molecular Function GO:0045449; regulation of transcription; Biological Process	NA
Pa2	31415550	Pm008167	6	IPR001373; Cullin, N-terminal IPR011991; Winged helix-turn-helix transcription repressor DNA-binding IPR016157; Cullin, conserved site IPR016158; Cullin homology IPR016159; Cullin repeat-like-containing domain IPR019559; Cullin protein, neddylation domain	3	GO:0006511; ubiquitin-dependent protein catabolic process; Biological Process GO:0031461; cullin-RING ubiquitin ligase complex; Cellular Component GO:0031625; ubiquitin protein ligase binding; Molecular Function	Cullin-1, putative; K03347 cullin 1
Pa2	31415550	Pm008168	1	IPR005123; Oxoglutarate/iron-dependent oxygenase	1	GO:0016491; oxidoreductase activity; Molecular Function	hypothetical protein; K06892
Pa2	31515616	Pm008177	9	IPR001412; Aminoacyl-tRNA synthetase, class I, conserved site IPR002300; Aminoacyl-tRNA synthetase, class Ia IPR002301; Isoleucyl-tRNA synthetase IPR009008; Valyl/Leucyl/Isoleucyl-tRNA synthetase, class Ia, editing domain IPR009080; Aminoacyl-tRNA synthetase, class 1a, anticodon-binding IPR010663; Zinc finger, DNA glycosylase/AP lyase/isoleucyl tRNA synthetase IPR013155; Valyl/Leucyl/Isoleucyl-tR…	9	GO:0000166; nucleotide binding; Molecular Function GO:0003824; catalytic activity; Molecular Function GO:0004812; aminoacyl-tRNA ligase activity; Molecular Function GO:0004822; isoleucine-tRNA ligase activity; Molecular Function GO:0005524; ATP binding; Molecular Function GO:0005737; cytoplasm; Cellular Component GO:0006412; translation; Biological Process GO:0006418; tRNA aminoacylation for prot…	isoleucyl tRNA synthetase, putative (EC:6.1.1.5); K01870 isoleucyl-tRNA synthetase [EC:6.1.1.5]
Pa2	33321747	Pm008456	11	IPR000409; BEACH domain IPR001680; WD40 repeat IPR011009; Protein kinase-like domain IPR011046; WD40 repeat-like-containing domain IPR011989; Armadillo-like helical IPR015943; WD40/YVTN repeat-like-containing domain IPR017442; Serine/threonine-protein kinase-like domain IPR017986; WD40-repeat-containing domain IPR019775; WD40 repeat, conserved site IPR019781; WD40 repeat, subgroup	5	GO:0004672; protein kinase activity; Molecular Function GO:0005488; binding; Molecular Function GO:0005515; protein binding; Molecular Function GO:0005524; ATP binding; Molecular Function GO:0006468; protein phosphorylation; Biological Process	hypothetical protein; K13124 mitogen-activated protein kinase organizer 1
Pa2	33321747	Pm008457	3	IPR002083; MATH IPR008974; TRAF-like IPR013322; TRAF-type	1	GO:0005515; protein binding; Molecular Function	hypothetical protein; K11838 ubiquitin carboxyl-terminal hydrolase 7 [EC:3.1.2.15]
Pa2	33490512	Pm008478	7	IPR000719; Protein kinase, catalytic domain IPR002290; Serine/threonine-protein kinase domain IPR008271; Serine/threonine-protein kinase, active site IPR011009; Protein kinase-like domain IPR017441; Protein kinase, ATP binding site IPR017442; Serine/threonine-protein kinase-like domain IPR020635; Tyrosine-protein kinase, catalytic domain	4	GO:0004672; protein kinase activity; Molecular Function GO:0004674; protein serine/threonine kinase activity; Molecular Function GO:0005524; ATP binding; Molecular Function GO:0006468; protein phosphorylation; Biological Process	hypothetical protein; K13430 serine/threonine-protein kinase PBS1 [EC:2.7.11.1]
Pa2	33490512	Pm008479	1	IPR004853; Domain of unknown function DUF250	NA	NA	hypothetical protein ; K03515 DNA repair protein REV1 [EC:2.7.7.-]
Pa2	33532670	Pm008490	3	IPR003594; ATPase-like, ATP-binding domain IPR005467; Signal transduction histidine kinase, core IPR018955; Branched-chain alpha-ketoacid dehydrogenase kinase/Pyruvate dehydrogenase kinase, N-terminal	5	GO:0000155; two-component sensor activity; Molecular Function GO:0004673; protein histidine kinase activity; Molecular Function GO:0005524; ATP binding; Molecular Function GO:0007165; signal transduction; Biological Process GO:0018106; peptidyl-histidine phosphorylation; Biological Process	pyruvate dehydrogenase, putative (EC:2.7.11.2); K00898 pyruvate dehydrogenase kinase [EC:2.7.11.2]
Pa2	33532670	Pm008491	4	IPR003656; Zinc finger, BED-type predicted IPR007021; Domain of unknown function DUF659 IPR008906; HAT dimerisation IPR012337; Ribonuclease H-like	3	GO:0003676; nucleic acid binding; Molecular Function GO:0003677; DNA binding; Molecular Function GO:0046983; protein dimerization activity; Molecular Function	hypothetical protein LOC100266583; K00036 glucose-6-phosphate 1-dehydrogenase [EC:1.1.1.49]
Pa2	33630922	Pm008508	NA	NA	NA	NA	NA
Pa2	33630922	Pm008509	NA	NA	NA	NA	NA
Pa2	36312283	Pm008806	1	IPR010678; Digestive organ expansion factor, predicted	1	GO:0005634; nucleus; Cellular Component	NA
Pa6	10678701	Pm021698	2	IPR001878; Zinc finger, CCHC-type IPR013084; Zinc finger, CCHC retroviral-type	2	GO:0003676; nucleic acid binding; Molecular Function GO:0008270; zinc ion binding; Molecular Function	hypothetical protein LOC100250334; K09250 cellular nucleic acid-binding protein
Pa6	10678701	Pm021699	NA	NA	NA	NA	NA
Pa6	13285954	Pm022028	NA	NA	NA	NA	NA
Pa6	13285954	Pm022029	NA	NA	NA	NA	NA
Pa6	13824385	Pm022088	NA	NA	NA	NA	NA
Pa6	15360262	Pm022236	1	IPR011990; Tetratricopeptide-like helical	1	GO:0005488; binding; Molecular Function	NA
Pa6	16660592	Pm022348	NA	NA	NA	NA	NA
Pa6	16660592	Pm022349	1	IPR016159; Cullin repeat-like-containing domain	NA	NA	NA
Pa6	17255610	Pm022406	2	IPR004255; O-acyltransferase, WSD1, N-terminal IPR009721; O-acyltransferase, WSD1, C-terminal	1	GO:0004144; diacylglycerol O-acyltransferase activity; Molecular Function	NA
Pa6	18074003	Pm022483	9	IPR000719; Protein kinase, catalytic domain IPR001245; Serine-threonine/tyrosine-protein kinase IPR002290; Serine/threonine-protein kinase domain IPR002902; Gnk2-homologous domain IPR008271; Serine/threonine-protein kinase, active site IPR011009; Protein kinase-like domain IPR017441; Protein kinase, ATP binding site IPR017442; Serine/threonine-protein kinase-like domain IPR020635; Tyrosine-protei…	4	GO:0004672; protein kinase activity; Molecular Function GO:0004674; protein serine/threonine kinase activity; Molecular Function GO:0005524; ATP binding; Molecular Function GO:0006468; protein phosphorylation; Biological Process	receptor serine-threonine protein kinase, putative (EC:2.7.10.2); K04733 interleukin-1 receptor-associated kinase 4 [EC:2.7.11.1]
Pa6	18616860	Pm022539	5	IPR000157; Toll-Interleukin receptor IPR000767; Disease resistance protein IPR001611; Leucine-rich repeat IPR002182; NB-ARC IPR003591; Leucine-rich repeat, typical subtype	8	GO:0004888; transmembrane receptor activity; Molecular Function GO:0005515; protein binding; Molecular Function GO:0005524; ATP binding; Molecular Function GO:0006915; apoptosis; Biological Process GO:0006952; defense response; Biological Process GO:0007165; signal transduction; Biological Process GO:0031224; intrinsic to membrane; Cellular Component GO:0045087; innate immune response; Biological…	GA10197 gene product from transcript GA10197-RA; K01768 adenylate cyclase [EC:4.6.1.1]
Pa6	18616860	Pm022540	5	IPR000157; Toll-Interleukin receptor IPR000767; Disease resistance protein IPR001611; Leucine-rich repeat IPR002182; NB-ARC IPR003591; Leucine-rich repeat, typical subtype	8	GO:0004888; transmembrane receptor activity; Molecular Function GO:0005515; protein binding; Molecular Function GO:0005524; ATP binding; Molecular Function GO:0006915; apoptosis; Biological Process GO:0006952; defense response; Biological Process GO:0007165; signal transduction; Biological Process GO:0031224; intrinsic to membrane; Cellular Component GO:0045087; innate immune response; Biological…	Disease resistance protein RPM1, putative (EC:3.1.3.16); K13457 disease resistance protein RPM1
Pa6	19742363	Pm022671	1	IPR003728; Ribosome maturation factor RimP	NA	NA	NA
Pa6	19858061	Pm022685	2	IPR004776; Auxin efflux carrier IPR014024; Auxin efflux carrier, plant type	2	GO:0016021; integral to membrane; Cellular Component GO:0055085; transmembrane transport; Biological Process	hypothetical protein LOC100250503; K13947 auxin efflux carrier family
Pa6	19858061	Pm022686	NA	NA	NA	NA	NA
Pa6	20192526	Pm022726	5	IPR001085; Serine hydroxymethyltransferase IPR015421; Pyridoxal phosphate-dependent transferase, major region, subdomain 1 IPR015422; Pyridoxal phosphate-dependent transferase, major region, subdomain 2 IPR015424; Pyridoxal phosphate-dependent transferase, major domain IPR019798; Serine hydroxymethyltransferase, pyridoxal phosphate binding site	5	GO:0003824; catalytic activity; Molecular Function GO:0004372; glycine hydroxymethyltransferase activity; Molecular Function GO:0006544; glycine metabolic process; Biological Process GO:0006563; L-serine metabolic process; Biological Process GO:0030170; pyridoxal phosphate binding; Molecular Function	similar to plastid serine hydroxymethyltransferase; K00600 glycine hydroxymethyltransferase [EC:2.1.2.1]
Pa6	20499550	Pm022769	3	IPR000767; Disease resistance protein IPR001611; Leucine-rich repeat IPR002182; NB-ARC	4	GO:0005515; protein binding; Molecular Function GO:0005524; ATP binding; Molecular Function GO:0006915; apoptosis; Biological Process GO:0006952; defense response; Biological Process	Disease resistance protein RPM1, putative (EC:3.1.3.16); K13457 disease resistance protein RPM1
Pa6	20499550	Pm022770	1	IPR008528; Protein of unknown function DUF810	NA	NA	NA
Pa6	20708819	Pm022795	1	IPR002912; Amino acid-binding ACT	2	GO:0008152; metabolic process; Biological Process GO:0016597; amino acid binding; Molecular Function	NA
Pa6	20708819	Pm022796	NA	NA	NA	NA	NA
Pa6	20940585	Pm022830	4	IPR000368; Sucrose synthase IPR001296; Glycosyl transferase, group 1 IPR006380; Sucrose-phosphate synthase IPR012819; Sucrose phosphate synthase, plant	3	GO:0005985; sucrose metabolic process; Biological Process GO:0009058; biosynthetic process; Biological Process GO:0046524; sucrose-phosphate synthase activity; Molecular Function	sucrose phosphate syntase, putative (EC:2.4.1.14); K00696 sucrose-phosphate synthase [EC:2.4.1.14]
Pa6	20940585	Pm022831	2	IPR001611; Leucine-rich repeat IPR003591; Leucine-rich repeat, typical subtype	1	GO:0005515; protein binding; Molecular Function	ERBB2IP; erbb2 interacting protein; K12796 erbb2-interacting protein
Pa7	5030091	Pm023441	4	IPR000425; Major intrinsic protein IPR012269; Aquaporin IPR022357; Major intrinsic protein, conserved site IPR023271; Aquaporin-like	5	GO:0005215; transporter activity; Molecular Function GO:0006810; transport; Biological Process GO:0016020; membrane; Cellular Component GO:0016021; integral to membrane; Cellular Component GO:0055085; transmembrane transport; Biological Process	TIP2;3; AtTIP2;3; ammonia transporter/ methylammonium transmembrane transporter/ water channel; K09873 aquaporin TIP
Pa7	5030091	Pm023442	3	IPR003107; RNA-processing protein, HAT helix IPR011990; Tetratricopeptide-like helical IPR013026; Tetratricopeptide repeat-containing	4	GO:0005488; binding; Molecular Function GO:0005515; protein binding; Molecular Function GO:0005622; intracellular; Cellular Component GO:0006396; RNA processing; Biological Process	hypothetical protein LOC100255371; K12869 crooked neck
Pa7	5205285	Pm023460	1	IPR006869; Domain of unknown function DUF547	NA	NA	NA
Pa7	8767375	Pm023849	3	IPR002305; Aminoacyl-tRNA synthetase, class Ib IPR002307; Tyrosyl-tRNA synthetase, class Ib IPR014729; Rossmann-like alpha/beta/alpha sandwich fold	8	GO:0000166; nucleotide binding; Molecular Function GO:0004812; aminoacyl-tRNA ligase activity; Molecular Function GO:0004831; tyrosine-tRNA ligase activity; Molecular Function GO:0005524; ATP binding; Molecular Function GO:0005737; cytoplasm; Cellular Component GO:0006412; translation; Biological Process GO:0006418; tRNA aminoacylation for protein translation; Biological Process GO:0006437; tyros…	hypothetical protein LOC100251282; K01866 tyrosyl-tRNA synthetase [EC:6.1.1.1]
Pa7	8767375	Pm023850	3	IPR000007; Tubby, C-terminal IPR000649; Initiation factor 2B-related IPR007612; Protein of unknown function DUF567	1	GO:0044237; cellular metabolic process; Biological Process	similar to GTP binding / translation initiation factor; K03239 translation initiation factor eIF-2B alpha subunit
Pa7	9124743	Pm023901	6	IPR000719; Protein kinase, catalytic domain IPR002290; Serine/threonine-protein kinase domain IPR011009; Protein kinase-like domain IPR017441; Protein kinase, ATP binding site IPR017442; Serine/threonine-protein kinase-like domain IPR020635; Tyrosine-protein kinase, catalytic domain	4	GO:0004672; protein kinase activity; Molecular Function GO:0004674; protein serine/threonine kinase activity; Molecular Function GO:0005524; ATP binding; Molecular Function GO:0006468; protein phosphorylation; Biological Process	putative MAP3K alpha 1 protein kinase (ISS); K11228 mitogen-activated protein kinase kinase kinase [EC:2.7.11.-]
Pa7	9124743	Pm023902	1	IPR015300; DNA-binding pseudobarrel domain	NA	NA	NA

## Sheet: B-Pedicel Length
PmID	PmPosition	gene	GENE_num	GENE	GO_num	GO	KEGG
Pa2	23696839	Pm007353	NA	NA	NA	NA	NA
Pa2	23696839	Pm007354	1	IPR004330; Transcription factor, FAR1-related	NA	NA	NA
Pa8	6756023	Pm025966	1	IPR014854; Nse4	NA	NA	NA
Pa8	7385965	Pm026049	3	IPR002109; Glutaredoxin IPR012335; Thioredoxin fold IPR012336; Thioredoxin-like fold	3	GO:0009055; electron carrier activity; Molecular Function GO:0015035; protein disulfide oxidoreductase activity; Molecular Function GO:0045454; cell redox homeostasis; Biological Process	NA

## Sheet: C-Shape
PmID	PmPosition	gene	GENE_num	GENE	GO_num	GO	KEGG
Pa1	4476127	Pm000738	6	IPR002085; Alcohol dehydrogenase superfamily, zinc-containing IPR011032; GroES-like IPR013149; Alcohol dehydrogenase, C-terminal IPR013154; Alcohol dehydrogenase GroES-like IPR016040; NAD(P)-binding domain IPR020843; Polyketide synthase, enoylreductase	7	GO:0003824; catalytic activity; Molecular Function GO:0005488; binding; Molecular Function GO:0008152; metabolic process; Biological Process GO:0008270; zinc ion binding; Molecular Function GO:0016491; oxidoreductase activity; Molecular Function GO:0016747; transferase activity, transferring acyl groups other than amino-acyl groups; Molecular Function GO:0055114; oxidation-reduction process; Biol…	zinc binding dehydrogenase, putative (EC:1.3.1.38); K07512 mitochondrial trans-2-enoyl-CoA reductase [EC:1.3.1.38]
Pa1	5939412	Pm000967	5	IPR002016; Haem peroxidase, plant/fungal/bacterial IPR002207; Plant ascorbate peroxidase IPR010255; Haem peroxidase IPR019793; Peroxidases heam-ligand binding site IPR019794; Peroxidase, active site	4	GO:0004601; peroxidase activity; Molecular Function GO:0006979; response to oxidative stress; Biological Process GO:0020037; heme binding; Molecular Function GO:0055114; oxidation-reduction process; Biological Process	hypothetical protein; K00434 L-ascorbate peroxidase [EC:1.11.1.11]
Pa1	5939412	Pm000968	1	IPR004147; ABC-1	NA	NA	Os04g0660200; K08869 aarF domain-containing kinase
Pa1	6139040	Pm000985	2	IPR001353; Proteasome, subunit alpha/beta IPR023333; Proteasome B-type subunit	3	GO:0004298; threonine-type endopeptidase activity; Molecular Function GO:0005839; proteasome core complex; Cellular Component GO:0051603; proteolysis involved in cellular protein catabolic process; Biological Process	hypothetical protein LOC100263853; K02736 20S proteasome subunit beta 7 [EC:3.4.25.1]

## Sheet: D-Petal Number
PmID	PmPosition	gene	GENE_num	GENE	GO_num	GO	KEGG
Pa1	828229	Pm000120	7	IPR000719; Protein kinase, catalytic domain IPR001305; Heat shock protein DnaJ, cysteine-rich domain IPR002290; Serine/threonine-protein kinase domain IPR008271; Serine/threonine-protein kinase, active site IPR011009; Protein kinase-like domain IPR017441; Protein kinase, ATP binding site IPR017442; Serine/threonine-protein kinase-like domain	7	GO:0004672; protein kinase activity; Molecular Function GO:0004674; protein serine/threonine kinase activity; Molecular Function GO:0005524; ATP binding; Molecular Function GO:0006457; protein folding; Biological Process GO:0006468; protein phosphorylation; Biological Process GO:0031072; heat shock protein binding; Molecular Function GO:0051082; unfolded protein binding; Molecular Function	similar to Csnk1a1-prov protein; K08957 casein kinase 1, alpha [EC:2.7.11.1]
Pa1	981066	Pm000143	1	IPR011598; Helix-loop-helix DNA-binding	3	GO:0005634; nucleus; Cellular Component GO:0030528; transcription regulator activity; Molecular Function GO:0045449; regulation of transcription; Biological Process	NA
Pa1	981066	Pm000144	2	IPR010658; Nodulin-like IPR016196; Major facilitator superfamily, general substrate transporter	NA	NA	NA
Pa1	1161574	Pm000175	4	IPR011990; Tetratricopeptide-like helical IPR013026; Tetratricopeptide repeat-containing IPR019183; N-acetyltransferase B complex, non-catalytic subunit IPR019734; Tetratricopeptide repeat	2	GO:0005488; binding; Molecular Function GO:0005515; protein binding; Molecular Function	NA
Pa1	1161574	Pm000176	6	IPR001117; Multicopper oxidase, type 1 IPR002355; Multicopper oxidase, copper-binding site IPR008972; Cupredoxin IPR011706; Multicopper oxidase, type 2 IPR011707; Multicopper oxidase, type 3 IPR017761; Laccase	6	GO:0005507; copper ion binding; Molecular Function GO:0008471; laccase activity; Molecular Function GO:0016491; oxidoreductase activity; Molecular Function GO:0046274; lignin catabolic process; Biological Process GO:0048046; apoplast; Cellular Component GO:0055114; oxidation-reduction process; Biological Process	l-ascorbate oxidase, putative (EC:1.10.3.3); K00423 L-ascorbate oxidase [EC:1.10.3.3]
Pa1	1386143	Pm000217	1	IPR001487; Bromodomain	1	GO:0005515; protein binding; Molecular Function	DNA binding; K11723 bromodomain-containing protein 7/9
Pa1	1386143	Pm000218	2	IPR000504; RNA recognition motif domain IPR012677; Nucleotide-binding, alpha-beta plait	2	GO:0000166; nucleotide binding; Molecular Function GO:0003676; nucleic acid binding; Molecular Function	hypothetical protein; K13195 cold-inducible RNA-binding protein
Pa1	1588940	Pm000256	5	IPR001431; Peptidase M16, zinc-binding site IPR007863; Peptidase M16, C-terminal IPR011237; Peptidase M16, core IPR011249; Metalloenzyme, LuxS/M16 peptidase-like, metal-binding IPR011765; Peptidase M16, N-terminal	5	GO:0003824; catalytic activity; Molecular Function GO:0004222; metalloendopeptidase activity; Molecular Function GO:0006508; proteolysis; Biological Process GO:0008270; zinc ion binding; Molecular Function GO:0046872; metal ion binding; Molecular Function	hypothetical protein; K01411 nardilysin [EC:3.4.24.61]
Pa1	1651546	Pm000266	NA	NA	NA	NA	NA
Pa1	1651546	Pm000267	1	IPR006943; Domain of unknown function DUF641, plant	NA	NA	hypothetical protein; K06636 structural maintenance of chromosome 1
Pa1	1824861	Pm000291	5	IPR001680; WD40 repeat IPR015943; WD40/YVTN repeat-like-containing domain IPR017986; WD40-repeat-containing domain IPR019781; WD40 repeat, subgroup IPR019782; WD40 repeat 2	1	GO:0005515; protein binding; Molecular Function	hypothetical protein ; K14548 U3 small nucleolar RNA-associated protein 4
Pa1	1824861	Pm000292	3	IPR000549; Photosystem I PsaG/PsaK protein IPR016370; Photosystem I PsaG/PsaK, reaction centre, plant IPR017494; Photosystem I PsaG, reaction centre, plant	3	GO:0009522; photosystem I; Cellular Component GO:0015979; photosynthesis; Biological Process GO:0016020; membrane; Cellular Component	Photosystem I reaction center subunit V, chloroplast precursor, putative; K08905 photosystem I subunit V
Pa1	1878953	Pm000299	NA	NA	NA	NA	NA
Pa1	1984610	Pm000314	3	IPR001932; Protein phosphatase 2C-like IPR014045; Protein phosphatase 2C, N-terminal IPR015655; Protein phosphatase 2C	1	GO:0003824; catalytic activity; Molecular Function	ATP binding / cAMP-dependent protein kinase regulator/ catalytic/ protein kinase/ protein serine/threonine phosphatase; K04345 protein kinase A [EC:2.7.11.11]
Pa1	2094051	Pm000331	1	IPR001251; Cellular retinaldehyde-binding/triple function, C-terminal	NA	NA	NA
Pa1	2094051	Pm000332	6	IPR000719; Protein kinase, catalytic domain IPR002290; Serine/threonine-protein kinase domain IPR008271; Serine/threonine-protein kinase, active site IPR011009; Protein kinase-like domain IPR017442; Serine/threonine-protein kinase-like domain IPR020635; Tyrosine-protein kinase, catalytic domain	4	GO:0004672; protein kinase activity; Molecular Function GO:0004674; protein serine/threonine kinase activity; Molecular Function GO:0005524; ATP binding; Molecular Function GO:0006468; protein phosphorylation; Biological Process	D6PKL2; D6PKL2 (D6 PROTEIN KINASE LIKE 2); kinase; K08286 protein-serine/threonine kinase [EC:2.7.11.-]
Pa1	2128174	Pm000338	2	IPR004648; Tetrapeptide transporter, OPT1/isp4 IPR004813; Oligopeptide transporter OPT superfamily	1	GO:0055085; transmembrane transport; Biological Process	NA
Pa1	2645457	Pm000429	3	IPR000608; Ubiquitin-conjugating enzyme, E2 IPR016135; Ubiquitin-conjugating enzyme/RWD-like IPR023313; Ubiquitin-conjugating enzyme, active site	2	GO:0016881; acid-amino acid ligase activity; Molecular Function GO:0043687; post-translational protein modification; Biological Process	hypothetical protein; K06689 ubiquitin-conjugating enzyme E2 D/E [EC:6.3.2.19]
Pa1	2645457	Pm000430	3	IPR001251; Cellular retinaldehyde-binding/triple function, C-terminal IPR008273; Cellular retinaldehyde-binding/triple function, N-terminal IPR011074; Phosphatidylinositol transfer protein-like, N-terminal	NA	NA	NA
Pa1	2856647	Pm000457	3	IPR002085; Alcohol dehydrogenase superfamily, zinc-containing IPR011032; GroES-like IPR013154; Alcohol dehydrogenase GroES-like	3	GO:0008270; zinc ion binding; Molecular Function GO:0016491; oxidoreductase activity; Molecular Function GO:0055114; oxidation-reduction process; Biological Process	hypothetical protein LOC100254635; K00001 alcohol dehydrogenase [EC:1.1.1.1]
Pa1	2856647	Pm000458	NA	NA	NA	NA	NA
Pa1	3023751	Pm000480	3	IPR011016; Zinc finger, RING-CH-type IPR013083; Zinc finger, RING/FYVE/PHD-type IPR018957; Zinc finger, C3HC4 RING-type	1	GO:0008270; zinc ion binding; Molecular Function	hypothetical protein; K10661 E3 ubiquitin-protein ligase MARCH6 [EC:6.3.2.19]
Pa1	3053576	Pm000486	4	IPR001245; Serine-threonine/tyrosine-protein kinase IPR002290; Serine/threonine-protein kinase domain IPR011009; Protein kinase-like domain IPR020635; Tyrosine-protein kinase, catalytic domain	4	GO:0004672; protein kinase activity; Molecular Function GO:0004674; protein serine/threonine kinase activity; Molecular Function GO:0005524; ATP binding; Molecular Function GO:0006468; protein phosphorylation; Biological Process	hypothetical protein; K14500 BR-signaling kinase [EC:2.7.11.1]
Pa1	3083407	Pm000490	1	IPR021916; Protein of unknown function DUF3527	NA	NA	NA
Pa1	3083407	Pm000491	2	IPR002068; Heat shock protein Hsp20 IPR008978; HSP20-like chaperone	NA	NA	hypothetical protein; K13993 HSP20 family protein
Pa1	3532052	Pm000574	9	IPR000719; Protein kinase, catalytic domain IPR002290; Serine/threonine-protein kinase domain IPR008271; Serine/threonine-protein kinase, active site IPR009091; Regulator of chromosome condensation/beta-lactamase-inhibitor protein II IPR011009; Protein kinase-like domain IPR013320; Concanavalin A-like lectin/glucanase, subgroup IPR017441; Protein kinase, ATP binding site IPR017442; Serine/threoni…	4	GO:0004672; protein kinase activity; Molecular Function GO:0004674; protein serine/threonine kinase activity; Molecular Function GO:0005524; ATP binding; Molecular Function GO:0006468; protein phosphorylation; Biological Process	Os03g0637800; K00924 [EC:2.7.1.-]
Pa1	3532052	Pm000575	1	IPR001648; Ribosomal protein S18	4	GO:0003735; structural constituent of ribosome; Molecular Function GO:0005622; intracellular; Cellular Component GO:0005840; ribosome; Cellular Component GO:0006412; translation; Biological Process	MRPS18; Putative mitochondrial ribosomal protein S18; K02963 small subunit ribosomal protein S18
Pa1	4337047	Pm000715	1	IPR005202; Transcription factor GRAS	NA	NA	GAL1; GAI1-like E3 ubiquitin ligase protein; K14494 DELLA protein
Pa1	4337047	Pm000716	1	IPR005202; Transcription factor GRAS	NA	NA	GRAS86; DELLA domain GRAS family transcription factor, GA insensitive (GAI), GA1-3 1 (RGA1) repressor protein; K14494 DELLA protein
Pa1	4395757	Pm000723	1	IPR010742; Rab5-interacting	NA	NA	NA
Pa1	4461170	Pm000735	1	IPR002885; Pentatricopeptide repeat	NA	NA	nucleobase:cation symporter; K03457 nucleobase:cation symporter-1, NCS1 family
Pa1	4461170	Pm000736	9	IPR000719; Protein kinase, catalytic domain IPR002290; Serine/threonine-protein kinase domain IPR003527; MAP kinase, conserved site IPR008271; Serine/threonine-protein kinase, active site IPR008351; JNK MAP kinase IPR011009; Protein kinase-like domain IPR017441; Protein kinase, ATP binding site IPR017442; Serine/threonine-protein kinase-like domain IPR020635; Tyrosine-protein kinase, catalytic do…	5	GO:0004672; protein kinase activity; Molecular Function GO:0004674; protein serine/threonine kinase activity; Molecular Function GO:0004707; MAP kinase activity; Molecular Function GO:0005524; ATP binding; Molecular Function GO:0006468; protein phosphorylation; Biological Process	hypothetical protein LOC100251947; K04371 extracellular signal-regulated kinase 1/2 [EC:2.7.11.24]
Pa1	4476127	Pm000738	6	IPR002085; Alcohol dehydrogenase superfamily, zinc-containing IPR011032; GroES-like IPR013149; Alcohol dehydrogenase, C-terminal IPR013154; Alcohol dehydrogenase GroES-like IPR016040; NAD(P)-binding domain IPR020843; Polyketide synthase, enoylreductase	7	GO:0003824; catalytic activity; Molecular Function GO:0005488; binding; Molecular Function GO:0008152; metabolic process; Biological Process GO:0008270; zinc ion binding; Molecular Function GO:0016491; oxidoreductase activity; Molecular Function GO:0016747; transferase activity, transferring acyl groups other than amino-acyl groups; Molecular Function GO:0055114; oxidation-reduction process; Biol…	zinc binding dehydrogenase, putative (EC:1.3.1.38); K07512 mitochondrial trans-2-enoyl-CoA reductase [EC:1.3.1.38]
Pa1	4889533	Pm000799	4	IPR006044; 11-S seed storage protein, plant IPR006045; Cupin 1 IPR011051; Cupin, RmlC-type IPR014710; RmlC-like jelly roll fold	1	GO:0045735; nutrient reservoir activity; Molecular Function	NA
Pa1	5463963	Pm000904	NA	NA	NA	NA	NA
Pa1	5574265	Pm000916	1	IPR009395; GCN5-like 1	NA	NA	NA
Pa1	5574265	Pm000917	3	IPR002496; Phosphoribosyl-AMP cyclohydrolase IPR008179; Phosphoribosyl-ATP pyrophosphohydrolase IPR021130; Phosphoribosyl-ATP pyrophosphohydrolase-like	3	GO:0000105; histidine biosynthetic process; Biological Process GO:0004635; phosphoribosyl-AMP cyclohydrolase activity; Molecular Function GO:0004636; phosphoribosyl-ATP diphosphatase activity; Molecular Function	hypothetical protein LOC100258301; K11755 phosphoribosyl-ATP pyrophosphohydrolase / phosphoribosyl-AMP cyclohydrolase [EC:3.6.1.31 3.5.4.19]
Pa1	5939412	Pm000967	5	IPR002016; Haem peroxidase, plant/fungal/bacterial IPR002207; Plant ascorbate peroxidase IPR010255; Haem peroxidase IPR019793; Peroxidases heam-ligand binding site IPR019794; Peroxidase, active site	4	GO:0004601; peroxidase activity; Molecular Function GO:0006979; response to oxidative stress; Biological Process GO:0020037; heme binding; Molecular Function GO:0055114; oxidation-reduction process; Biological Process	hypothetical protein; K00434 L-ascorbate peroxidase [EC:1.11.1.11]
Pa1	5939412	Pm000968	1	IPR004147; ABC-1	NA	NA	Os04g0660200; K08869 aarF domain-containing kinase
Pa1	6063389	Pm000977	NA	NA	NA	NA	NA
Pa1	6063389	Pm000978	NA	NA	NA	NA	NA
Pa1	6139040	Pm000985	2	IPR001353; Proteasome, subunit alpha/beta IPR023333; Proteasome B-type subunit	3	GO:0004298; threonine-type endopeptidase activity; Molecular Function GO:0005839; proteasome core complex; Cellular Component GO:0051603; proteolysis involved in cellular protein catabolic process; Biological Process	hypothetical protein LOC100263853; K02736 20S proteasome subunit beta 7 [EC:3.4.25.1]
Pa1	6308538	Pm001006	1	IPR000782; FAS1 domain	NA	NA	NA
Pa1	6308538	Pm001007	1	IPR000782; FAS1 domain	NA	NA	NA
Pa1	7645577	Pm001171	1	IPR004864; Late embryogenesis abundant protein, group 2	NA	NA	NA
Pa1	7645577	Pm001172	2	IPR001841; Zinc finger, RING-type IPR013083; Zinc finger, RING/FYVE/PHD-type	2	GO:0005515; protein binding; Molecular Function GO:0008270; zinc ion binding; Molecular Function	hypothetical protein; K01931 protein neuralized
Pa1	8018784	Pm001211	1	IPR002100; Transcription factor, MADS-box	4	GO:0003700; sequence-specific DNA binding transcription factor activity; Molecular Function GO:0005634; nucleus; Cellular Component GO:0006355; regulation of transcription, DNA-dependent; Biological Process GO:0043565; sequence-specific DNA binding; Molecular Function	NA
Pa1	8018784	Pm001212	8	IPR001965; Zinc finger, PHD-type IPR004022; DDT domain IPR011011; Zinc finger, FYVE/PHD-type IPR013083; Zinc finger, RING/FYVE/PHD-type IPR018500; DDT domain, subgroup IPR018501; DDT domain superfamily IPR019786; Zinc finger, PHD-type, conserved site IPR019787; Zinc finger, PHD-finger	2	GO:0005515; protein binding; Molecular Function GO:0008270; zinc ion binding; Molecular Function	fetal alzheimer antigen, falz, putative (EC:2.3.1.48); K11728 nucleosome-remodeling factor subunit BPTF
Pa1	8283839	Pm001236	NA	NA	NA	NA	NA
Pa1	8283839	Pm001237	4	IPR000988; Ribosomal protein L24e IPR011017; TRASH IPR023441; Ribosomal protein L24e domain IPR023442; Ribosomal protein L24e, conserved site	3	GO:0003735; structural constituent of ribosome; Molecular Function GO:0005840; ribosome; Cellular Component GO:0006412; translation; Biological Process	hypothetical protein LOC100250021; K02896 large subunit ribosomal protein L24e
Pa1	9548333	Pm001366	NA	NA	NA	NA	NA
Pa1	9548333	Pm001367	2	IPR000058; Zinc finger, AN1-type IPR002653; Zinc finger, A20-type	2	GO:0003677; DNA binding; Molecular Function GO:0008270; zinc ion binding; Molecular Function	MGC52567; similar to testis-specific gene including a ubiquitin-likely domain; K12163 AN1-type zinc finger and ubiquitin domain-containing protein 1
Pa1	10005558	Pm001427	NA	NA	NA	NA	NA
Pa1	10005558	Pm001428	NA	NA	NA	NA	NA
Pa1	10117167	Pm001440	4	IPR002198; Short-chain dehydrogenase/reductase SDR IPR002347; Glucose/ribitol dehydrogenase IPR016040; NAD(P)-binding domain IPR020904; Short-chain dehydrogenase/reductase, conserved site	5	GO:0003824; catalytic activity; Molecular Function GO:0005488; binding; Molecular Function GO:0008152; metabolic process; Biological Process GO:0016491; oxidoreductase activity; Molecular Function GO:0055114; oxidation-reduction process; Biological Process	Os04g0179200; K13070 momilactone-A synthase [EC:1.1.1.295]
Pa1	10117167	Pm001441	4	IPR002198; Short-chain dehydrogenase/reductase SDR IPR002347; Glucose/ribitol dehydrogenase IPR016040; NAD(P)-binding domain IPR020904; Short-chain dehydrogenase/reductase, conserved site	5	GO:0003824; catalytic activity; Molecular Function GO:0005488; binding; Molecular Function GO:0008152; metabolic process; Biological Process GO:0016491; oxidoreductase activity; Molecular Function GO:0055114; oxidation-reduction process; Biological Process	Os04g0179200; K13070 momilactone-A synthase [EC:1.1.1.295]
Pa1	10150959	Pm001443	4	IPR001360; Glycoside hydrolase, family 1 IPR013781; Glycoside hydrolase, subgroup, catalytic core IPR017853; Glycoside hydrolase, superfamily IPR018120; Glycoside hydrolase, family 1, active site	4	GO:0003824; catalytic activity; Molecular Function GO:0004553; hydrolase activity, hydrolyzing O-glycosyl compounds; Molecular Function GO:0005975; carbohydrate metabolic process; Biological Process GO:0043169; cation binding; Molecular Function	beta-glucosidase, putative (EC:3.2.1.21); K01188 beta-glucosidase [EC:3.2.1.21]
Pa1	10150959	Pm001444	3	IPR001360; Glycoside hydrolase, family 1 IPR013781; Glycoside hydrolase, subgroup, catalytic core IPR017853; Glycoside hydrolase, superfamily	4	GO:0003824; catalytic activity; Molecular Function GO:0004553; hydrolase activity, hydrolyzing O-glycosyl compounds; Molecular Function GO:0005975; carbohydrate metabolic process; Biological Process GO:0043169; cation binding; Molecular Function	hypothetical protein; K01188 beta-glucosidase [EC:3.2.1.21]
Pa1	10267564	Pm001454	NA	NA	NA	NA	hypothetical protein; K11578 centromere/kinetochore protein ZW10
Pa1	10267564	Pm001455	1	IPR017498; Photosystem I PsaO	NA	NA	hypothetical protein; K14332 photosystem I subunit PsaO
Pa1	10279156	Pm001455	1	IPR017498; Photosystem I PsaO	NA	NA	hypothetical protein; K14332 photosystem I subunit PsaO
Pa1	10279156	Pm001456	3	IPR001327; Pyridine nucleotide-disulphide oxidoreductase, NAD-binding region IPR013027; FAD-dependent pyridine nucleotide-disulphide oxidoreductase IPR016040; NAD(P)-binding domain	6	GO:0003824; catalytic activity; Molecular Function GO:0005488; binding; Molecular Function GO:0008152; metabolic process; Biological Process GO:0016491; oxidoreductase activity; Molecular Function GO:0050660; flavin adenine dinucleotide binding; Molecular Function GO:0055114; oxidation-reduction process; Biological Process	AMID-like mitochondrial oxidoreductase (EC:1.-.-.-); K00540 [EC:1.-.-.-]
Pa1	10319172	Pm001460	3	IPR001344; Chlorophyll A-B binding protein, plant IPR022796; Chlorophyll A-B binding protein IPR023329; Chlorophyll a/b binding protein domain	2	GO:0009765; photosynthesis, light harvesting; Biological Process GO:0016020; membrane; Cellular Component	hypothetical protein LOC100250504; K08912 light-harvesting complex II chlorophyll a/b binding protein 1
Pa1	10319172	Pm001461	NA	NA	NA	NA	NA
Pa1	10329159	Pm001461	NA	NA	NA	NA	NA
Pa1	10329159	Pm001462	1	IPR020683; Ankyrin repeat-containing domain	NA	NA	NA
Pa1	10333752	Pm001461	NA	NA	NA	NA	NA
Pa1	10333752	Pm001462	1	IPR020683; Ankyrin repeat-containing domain	NA	NA	NA
Pa1	10380660	Pm001466	NA	NA	NA	NA	NA
Pa1	10380660	Pm001467	1	IPR003441; No apical meristem (NAM) protein	2	GO:0003677; DNA binding; Molecular Function GO:0045449; regulation of transcription; Biological Process	NA
Pa1	10381516	Pm001466	NA	NA	NA	NA	NA
Pa1	10381516	Pm001467	1	IPR003441; No apical meristem (NAM) protein	2	GO:0003677; DNA binding; Molecular Function GO:0045449; regulation of transcription; Biological Process	NA
Pa1	10572845	Pm001489	1	IPR021410; Protein of unknown function DUF3049	NA	NA	NA
Pa1	10572845	Pm001490	7	IPR005833; Haloacid dehydrogenase/epoxide hydrolase IPR005834; Haloacid dehalogenase-like hydrolase IPR006402; HAD-superfamily hydrolase, subfamily IA, variant 3 IPR015865; Riboflavin kinase domain, bacterial/eukaryotic IPR023214; HAD-like domain IPR023465; Riboflavin kinase domain IPR023468; Riboflavin kinase	5	GO:0003824; catalytic activity; Molecular Function GO:0008152; metabolic process; Biological Process GO:0008531; riboflavin kinase activity; Molecular Function GO:0009231; riboflavin biosynthetic process; Biological Process GO:0016787; hydrolase activity; Molecular Function	riboflavin kinase (EC:2.7.1.26); K00861 riboflavin kinase [EC:2.7.1.26]
Pa1	10584896	Pm001489	1	IPR021410; Protein of unknown function DUF3049	NA	NA	NA
Pa1	10584896	Pm001490	7	IPR005833; Haloacid dehydrogenase/epoxide hydrolase IPR005834; Haloacid dehalogenase-like hydrolase IPR006402; HAD-superfamily hydrolase, subfamily IA, variant 3 IPR015865; Riboflavin kinase domain, bacterial/eukaryotic IPR023214; HAD-like domain IPR023465; Riboflavin kinase domain IPR023468; Riboflavin kinase	5	GO:0003824; catalytic activity; Molecular Function GO:0008152; metabolic process; Biological Process GO:0008531; riboflavin kinase activity; Molecular Function GO:0009231; riboflavin biosynthetic process; Biological Process GO:0016787; hydrolase activity; Molecular Function	riboflavin kinase (EC:2.7.1.26); K00861 riboflavin kinase [EC:2.7.1.26]
Pa1	10614292	Pm001491	2	IPR007900; Transcription initiation factor TFIID component TAF4 IPR022003; RST domain of plant C-terminal	3	GO:0005669; transcription factor TFIID complex; Cellular Component GO:0006352; transcription initiation, DNA-dependent; Biological Process GO:0016986; transcription initiation factor activity; Molecular Function	NA
Pa1	10637898	Pm001493	1	IPR002885; Pentatricopeptide repeat	NA	NA	Cell division protein ftsH, putative (EC:3.6.4.3); K03798 cell division protease FtsH [EC:3.4.24.-]
Pa1	10637898	Pm001494	2	IPR002885; Pentatricopeptide repeat IPR011990; Tetratricopeptide-like helical	1	GO:0005488; binding; Molecular Function	Cell division protein ftsH, putative (EC:3.6.4.3); K03798 cell division protease FtsH [EC:3.4.24.-]
Pa1	10721483	Pm001502	1	IPR020966; Malate transporter, aliminium toerance	1	GO:0010044; response to aluminum ion; Biological Process	NA
Pa1	10852785	Pm001509	NA	NA	NA	NA	hypothetical protein; K00703 starch synthase [EC:2.4.1.21]
Pa1	10852785	Pm001510	NA	NA	NA	NA	NA
Pa1	11019702	Pm001524	NA	NA	NA	NA	NA
Pa1	11019702	Pm001525	NA	NA	NA	NA	NA
Pa1	11051068	Pm001528	4	IPR000719; Protein kinase, catalytic domain IPR001245; Serine-threonine/tyrosine-protein kinase IPR011009; Protein kinase-like domain IPR020635; Tyrosine-protein kinase, catalytic domain	3	GO:0004672; protein kinase activity; Molecular Function GO:0005524; ATP binding; Molecular Function GO:0006468; protein phosphorylation; Biological Process	Os02g0513000; K13430 serine/threonine-protein kinase PBS1 [EC:2.7.11.1]
Pa1	11147554	Pm001540	NA	NA	NA	NA	NA
Pa1	11147554	Pm001541	3	IPR001394; Peptidase C19, ubiquitin carboxyl-terminal hydrolase 2 IPR006615; Peptidase C19, ubiquitin-specific peptidase, DUSP domain IPR018200; Peptidase C19, ubiquitin carboxyl-terminal hydrolase 2, conserved site	2	GO:0004221; ubiquitin thiolesterase activity; Molecular Function GO:0006511; ubiquitin-dependent protein catabolic process; Biological Process	Ubiquitin carboxyl-terminal hydrolase, putative (EC:3.1.2.15); K11835 ubiquitin carboxyl-terminal hydrolase 4/11/15 [EC:3.1.2.15]
Pa1	11477446	Pm001574	5	IPR001394; Peptidase C19, ubiquitin carboxyl-terminal hydrolase 2 IPR002083; MATH IPR008974; TRAF-like IPR013322; TRAF-type IPR018200; Peptidase C19, ubiquitin carboxyl-terminal hydrolase 2, conserved site	3	GO:0004221; ubiquitin thiolesterase activity; Molecular Function GO:0005515; protein binding; Molecular Function GO:0006511; ubiquitin-dependent protein catabolic process; Biological Process	hypothetical protein LOC100266796; K11838 ubiquitin carboxyl-terminal hydrolase 7 [EC:3.1.2.15]
Pa1	11593973	Pm001586	NA	NA	NA	NA	NA
Pa1	11593973	Pm001587	3	IPR001764; Glycoside hydrolase, family 3, N-terminal IPR002772; Glycoside hydrolase, family 3, C-terminal IPR017853; Glycoside hydrolase, superfamily	2	GO:0004553; hydrolase activity, hydrolyzing O-glycosyl compounds; Molecular Function GO:0005975; carbohydrate metabolic process; Biological Process	hypothetical protein LOC100255282; K01188 beta-glucosidase [EC:3.2.1.21]
Pa1	11651404	Pm001595	3	IPR001764; Glycoside hydrolase, family 3, N-terminal IPR002772; Glycoside hydrolase, family 3, C-terminal IPR017853; Glycoside hydrolase, superfamily	2	GO:0004553; hydrolase activity, hydrolyzing O-glycosyl compounds; Molecular Function GO:0005975; carbohydrate metabolic process; Biological Process	hypothetical protein LOC100255282; K01188 beta-glucosidase [EC:3.2.1.21]
Pa1	11651404	Pm001596	NA	NA	NA	NA	NA
Pa1	11688798	Pm001597	2	IPR000209; Peptidase S8/S53, subtilisin/kexin/sedolisin IPR015500; Peptidase S8, subtilisin-related	2	GO:0004252; serine-type endopeptidase activity; Molecular Function GO:0006508; proteolysis; Biological Process	NA
Pa1	12065801	Pm001647	5	IPR001453; Molybdopterin binding IPR005110; MoeA, N-terminal and linker domain IPR005111; MoeA, C-terminal, domain IV IPR008284; Molybdenum cofactor biosynthesis, conserved site IPR020817; Molybdenum cofactor synthesis	2	GO:0006777; Mo-molybdopterin cofactor biosynthetic process; Biological Process GO:0032324; molybdopterin cofactor biosynthetic process; Biological Process	molybdopterin biosynthesis protein, putative; K03750 molybdopterin biosynthesis protein MoeA
Pa1	12290991	Pm001666	3	IPR006607; Protein of unknown function DM15 IPR006630; RNA-binding protein Lupus La IPR011991; Winged helix-turn-helix transcription repressor DNA-binding	NA	NA	ssb, wu:fb17f11, zgc:55588; Sjogren syndrome antigen B (autoantigen La); K11090 lupus La protein
Pa1	12352069	Pm001670	NA	NA	NA	NA	NA
Pa1	12352069	Pm001671	2	IPR004827; Basic-leucine zipper (bZIP) transcription factor IPR011616; bZIP transcription factor, bZIP-1	4	GO:0003700; sequence-specific DNA binding transcription factor activity; Molecular Function GO:0006355; regulation of transcription, DNA-dependent; Biological Process GO:0043565; sequence-specific DNA binding; Molecular Function GO:0046983; protein dimerization activity; Molecular Function	hypothetical protein; K14432 ABA responsive element binding factor
Pa1	12450740	Pm001680	6	IPR000719; Protein kinase, catalytic domain IPR001245; Serine-threonine/tyrosine-protein kinase IPR002290; Serine/threonine-protein kinase domain IPR008271; Serine/threonine-protein kinase, active site IPR011009; Protein kinase-like domain IPR020635; Tyrosine-protein kinase, catalytic domain	4	GO:0004672; protein kinase activity; Molecular Function GO:0004674; protein serine/threonine kinase activity; Molecular Function GO:0005524; ATP binding; Molecular Function GO:0006468; protein phosphorylation; Biological Process	hypothetical protein; K04733 interleukin-1 receptor-associated kinase 4 [EC:2.7.11.1]
Pa1	12450740	Pm001681	NA	NA	NA	NA	hypothetical protein LOC100251380; K10880 DNA-repair protein XRCC3
Pa1	12567685	Pm001692	NA	NA	NA	NA	NA
Pa1	12567685	Pm001693	2	IPR008985; Concanavalin A-like lectin/glucanase IPR014895; Alginate lyase 2	NA	NA	NA
Pa1	12585849	Pm001694	7	IPR002085; Alcohol dehydrogenase superfamily, zinc-containing IPR002328; Alcohol dehydrogenase, zinc-containing, conserved site IPR011032; GroES-like IPR013149; Alcohol dehydrogenase, C-terminal IPR013154; Alcohol dehydrogenase GroES-like IPR016040; NAD(P)-binding domain IPR020843; Polyketide synthase, enoylreductase	7	GO:0003824; catalytic activity; Molecular Function GO:0005488; binding; Molecular Function GO:0008152; metabolic process; Biological Process GO:0008270; zinc ion binding; Molecular Function GO:0016491; oxidoreductase activity; Molecular Function GO:0016747; transferase activity, transferring acyl groups other than amino-acyl groups; Molecular Function GO:0055114; oxidation-reduction process; Biol…	hypothetical protein LOC100245522; K00083 cinnamyl-alcohol dehydrogenase [EC:1.1.1.195]
Pa1	12585849	Pm001695	2	IPR002938; Monooxygenase, FAD-binding IPR003042; Aromatic-ring hydroxylase-like	4	GO:0004497; monooxygenase activity; Molecular Function GO:0008152; metabolic process; Biological Process GO:0016491; oxidoreductase activity; Molecular Function GO:0055114; oxidation-reduction process; Biological Process	AO090003000349; salicylate 1-monooxygenase SalA; K00480 salicylate hydroxylase [EC:1.14.13.1]
Pa1	13094593	Pm001741	1	IPR002775; DNA/RNA-binding protein Alba-like	1	GO:0003676; nucleic acid binding; Molecular Function	hypothetical protein; K14525 ribonucleases P/MRP protein subunit RPP25 [EC:3.1.26.5]
Pa1	13151308	Pm001746	3	IPR004123; mRNA splicing factor, thioredoxin-like U5 snRNP IPR012335; Thioredoxin fold IPR012336; Thioredoxin-like fold	2	GO:0005681; spliceosomal complex; Cellular Component GO:0007067; mitosis; Biological Process	pco104916; LOC100282486; K12859 U5 snRNP protein, DIM1 family
Pa1	13151308	Pm001747	NA	NA	NA	NA	NA
Pa1	13334690	Pm001763	1	IPR003746; Protein of unknown function DUF167	NA	NA	hypothetical protein LOC100259033; K09131 hypothetical protein
Pa1	13334690	Pm001764	8	IPR000719; Protein kinase, catalytic domain IPR000858; S-locus glycoprotein IPR001245; Serine-threonine/tyrosine-protein kinase IPR001480; Bulb-type lectin domain IPR002290; Serine/threonine-protein kinase domain IPR011009; Protein kinase-like domain IPR017441; Protein kinase, ATP binding site IPR020635; Tyrosine-protein kinase, catalytic domain	6	GO:0004672; protein kinase activity; Molecular Function GO:0004674; protein serine/threonine kinase activity; Molecular Function GO:0005524; ATP binding; Molecular Function GO:0005529; sugar binding; Molecular Function GO:0006468; protein phosphorylation; Biological Process GO:0048544; recognition of pollen; Biological Process	receptor serine-threonine protein kinase, putative (EC:2.7.10.2); K04733 interleukin-1 receptor-associated kinase 4 [EC:2.7.11.1]
Pa1	13542522	Pm001787	NA	NA	NA	NA	NA
Pa1	13542522	Pm001788	NA	NA	NA	NA	NA
Pa1	13578351	Pm001792	2	IPR000915; Ribosomal protein L6E IPR014722; Translation protein SH3-like, subgroup	4	GO:0003735; structural constituent of ribosome; Molecular Function GO:0005622; intracellular; Cellular Component GO:0005840; ribosome; Cellular Component GO:0006412; translation; Biological Process	60S ribosomal protein L6, putative; K02934 large subunit ribosomal protein L6e
Pa1	13578351	Pm001793	NA	NA	NA	NA	NA
Pa1	13590547	Pm001794	NA	NA	NA	NA	NA
Pa1	13590547	Pm001795	NA	NA	NA	NA	NA
Pa1	13851464	Pm001813	NA	NA	NA	NA	NA
Pa1	13960202	Pm001823	3	IPR000361; FeS cluster biogenesis IPR016092; FeS cluster insertion IPR017870; FeS cluster insertion, C-terminal, conserved site	3	GO:0005198; structural molecule activity; Molecular Function GO:0016226; iron-sulfur cluster assembly; Biological Process GO:0051536; iron-sulfur cluster binding; Molecular Function	hypothetical protein LOC100249101; K13628 iron-sulfur cluster assembly protein
Pa1	14012124	Pm001830	NA	NA	NA	NA	NA
Pa1	14012124	Pm001831	3	IPR005570; RNA polymerase, Rpb8 IPR012340; Nucleic acid-binding, OB-fold IPR016027; Nucleic acid-binding, OB-fold-like	1	GO:0006350; transcription; Biological Process	Os03g0845700; K03016 DNA-directed RNA polymerases I, II, and III subunit RPABC3
Pa1	14081062	Pm001836	3	IPR000891; Pyruvate carboxyltransferase IPR002034; Alpha-isopropylmalate/homocitrate synthase, conserved site IPR013785; Aldolase-type TIM barrel	4	GO:0003824; catalytic activity; Molecular Function GO:0008152; metabolic process; Biological Process GO:0019752; carboxylic acid metabolic process; Biological Process GO:0046912; transferase activity, transferring acyl groups, acyl groups converted into alkyl on transfer; Molecular Function	isopropylmalate synthase, putative (EC:2.3.3.13); K01649 2-isopropylmalate synthase [EC:2.3.3.13]
Pa1	14081062	Pm001837	NA	NA	NA	NA	NA
Pa1	14142311	Pm001843	NA	NA	NA	NA	NA
Pa1	14142311	Pm001844	NA	NA	NA	NA	NA
Pa1	14176659	Pm001848	1	IPR006121; Heavy metal transport/detoxification protein	2	GO:0030001; metal ion transport; Biological Process GO:0046872; metal ion binding; Molecular Function	NA
Pa1	14176659	Pm001849	NA	NA	NA	NA	NA
Pa1	14396558	Pm001867	NA	NA	NA	NA	Os04g0349500; K02995 small subunit ribosomal protein S8e
Pa1	14396558	Pm001868	1	IPR018731; Autophagy-related protein 13	NA	NA	DEHA2E09020p; K08331 autophagy-related protein 13
Pa1	14460013	Pm001871	NA	NA	NA	NA	NA
Pa1	14460013	Pm001872	1	IPR003653; Peptidase C48, SUMO/Sentrin/Ubl1	2	GO:0006508; proteolysis; Biological Process GO:0008234; cysteine-type peptidase activity; Molecular Function	NA
Pa1	14832969	Pm001911	NA	NA	NA	NA	NA
Pa1	14832969	Pm001912	1	IPR000620; Drug/metabolite transporter	1	GO:0016020; membrane; Cellular Component	NA
Pa1	14833265	Pm001911	NA	NA	NA	NA	NA
Pa1	14833265	Pm001912	1	IPR000620; Drug/metabolite transporter	1	GO:0016020; membrane; Cellular Component	NA
Pa1	14905204	Pm001916	2	IPR000767; Disease resistance protein IPR002182; NB-ARC	3	GO:0005524; ATP binding; Molecular Function GO:0006915; apoptosis; Biological Process GO:0006952; defense response; Biological Process	hypothetical protein LOC100258314; K01164 ribonuclease P/MRP protein subunit POP1 [EC:3.1.26.5]
Pa1	14986688	Pm001926	6	IPR001117; Multicopper oxidase, type 1 IPR002355; Multicopper oxidase, copper-binding site IPR008972; Cupredoxin IPR011706; Multicopper oxidase, type 2 IPR011707; Multicopper oxidase, type 3 IPR017760; L-ascorbate oxidase, plants	5	GO:0005507; copper ion binding; Molecular Function GO:0005576; extracellular region; Cellular Component GO:0008447; L-ascorbate oxidase activity; Molecular Function GO:0016491; oxidoreductase activity; Molecular Function GO:0055114; oxidation-reduction process; Biological Process	hypothetical protein LOC100251280; K00423 L-ascorbate oxidase [EC:1.10.3.3]
Pa1	15048954	Pm001932	NA	NA	NA	NA	NA
Pa1	15048954	Pm001933	1	IPR003653; Peptidase C48, SUMO/Sentrin/Ubl1	2	GO:0006508; proteolysis; Biological Process GO:0008234; cysteine-type peptidase activity; Molecular Function	NA
Pa1	15064468	Pm001934	NA	NA	NA	NA	hypothetical protein; K03036 26S proteasome regulatory subunit N6
Pa1	15064468	Pm001935	3	IPR001623; Heat shock protein DnaJ, N-terminal IPR003095; Heat shock protein DnaJ IPR018253; Heat shock protein DnaJ, conserved site	3	GO:0006457; protein folding; Biological Process GO:0031072; heat shock protein binding; Molecular Function GO:0051082; unfolded protein binding; Molecular Function	hypothetical protein ; K09510 DnaJ homolog subfamily B member 4
Pa1	15119996	Pm001937	NA	NA	NA	NA	NA
Pa1	15119996	Pm001938	2	IPR004147; ABC-1 IPR011009; Protein kinase-like domain	NA	NA	Os09g0250700; K08869 aarF domain-containing kinase
Pa1	15134278	Pm001938	2	IPR004147; ABC-1 IPR011009; Protein kinase-like domain	NA	NA	Os09g0250700; K08869 aarF domain-containing kinase
Pa1	15210911	Pm001948	3	IPR000595; Cyclic nucleotide-binding domain IPR014710; RmlC-like jelly roll fold IPR018490; Cyclic nucleotide-binding-like	NA	NA	ATCNGC3 (CYCLIC NUCLEOTIDE GATED CHANNEL 3); calmodulin binding / cyclic nucleotide binding / ion channel; K05391 cyclic nucleotide gated channel, other eukaryote
Pa1	15210911	Pm001949	3	IPR000595; Cyclic nucleotide-binding domain IPR014710; RmlC-like jelly roll fold IPR018490; Cyclic nucleotide-binding-like	NA	NA	CNGC1; CNGC1 (CYCLIC NUCLEOTIDE GATED CHANNEL 1); calmodulin binding / cation channel/ cyclic nucleotide binding / intracellular cyclic nucleotide activated cation channel/ inward rectifier potassium channel; K05391 cyclic nucleotide gated channel, other eukaryote
Pa1	15280114	Pm001955	NA	NA	NA	NA	NA
Pa1	15280114	Pm001956	NA	NA	NA	NA	NA
Pa1	15348400	Pm001959	2	IPR001024; Lipoxygenase, LH2 IPR008976; Lipase/lipooxygenase, PLAT/LH2	1	GO:0005515; protein binding; Molecular Function	NA
Pa1	15348400	Pm001960	5	IPR001440; Tetratricopeptide TPR-1 IPR011990; Tetratricopeptide-like helical IPR013026; Tetratricopeptide repeat-containing IPR013105; Tetratricopeptide TPR2 IPR019734; Tetratricopeptide repeat	2	GO:0005488; binding; Molecular Function GO:0005515; protein binding; Molecular Function	AGAP008985-PA; K09527 DnaJ homolog subfamily C member 7
Pa1	15744912	Pm002007	5	IPR000048; IQ motif, EF-hand binding site IPR002909; Cell surface receptor IPT/TIG IPR005559; CG-1 IPR013783; Immunoglobulin-like fold IPR014756; Immunoglobulin E-set	5	GO:0005515; protein binding; Molecular Function GO:0005516; calmodulin binding; Molecular Function GO:0005634; nucleus; Cellular Component GO:0030528; transcription regulator activity; Molecular Function GO:0045449; regulation of transcription; Biological Process	NA
Pa1	15913530	Pm002029	NA	NA	NA	NA	NA
Pa1	15913530	Pm002030	NA	NA	NA	NA	NA
Pa1	16032064	Pm002042	NA	NA	NA	NA	NA
Pa1	16032064	Pm002043	NA	NA	NA	NA	NA
Pa1	16044018	Pm002043	NA	NA	NA	NA	NA
Pa1	16044018	Pm002044	2	IPR001611; Leucine-rich repeat IPR011713; Leucine-rich repeat 3	1	GO:0005515; protein binding; Molecular Function	ATP binding / protein binding; K06685 maintenance of ploidy protein MOB1 (MPS1 binder 1)
Pa1	16778275	Pm002119	2	IPR005814; Aminotransferase class-III IPR015421; Pyridoxal phosphate-dependent transferase, major region, subdomain 1	3	GO:0003824; catalytic activity; Molecular Function GO:0008483; transaminase activity; Molecular Function GO:0030170; pyridoxal phosphate binding; Molecular Function	hypothetical protein; K00833 adenosylmethionine-8-amino-7-oxononanoate aminotransferase [EC:2.6.1.62]
Pa1	16778275	Pm002120	3	IPR001841; Zinc finger, RING-type IPR013083; Zinc finger, RING/FYVE/PHD-type IPR018957; Zinc finger, C3HC4 RING-type	2	GO:0005515; protein binding; Molecular Function GO:0008270; zinc ion binding; Molecular Function	zgc:158807; K11982 E3 ubiquitin-protein ligase RNF115/126 [EC:6.3.2.19]
Pa1	16907794	Pm002129	1	IPR002528; Multi antimicrobial extrusion protein	5	GO:0006855; drug transmembrane transport; Biological Process GO:0015238; drug transmembrane transporter activity; Molecular Function GO:0015297; antiporter activity; Molecular Function GO:0016020; membrane; Cellular Component GO:0055085; transmembrane transport; Biological Process	NA
Pa1	16907794	Pm002130	NA	NA	NA	NA	NA
Pa1	16921488	Pm002130	NA	NA	NA	NA	NA
Pa1	16921488	Pm002131	NA	NA	NA	NA	NA
Pa1	17164402	Pm002165	2	IPR001752; Kinesin, motor domain IPR019821; Kinesin, motor region, conserved site	3	GO:0003777; microtubule motor activity; Molecular Function GO:0005524; ATP binding; Molecular Function GO:0007018; microtubule-based movement; Biological Process	ATP binding protein, putative; K10406 kinesin family member C2/C3
Pa1	17372936	Pm002178	1	IPR019557; Aminotransferase-like, plant mobile domain	NA	NA	NA
Pa1	17372936	Pm002179	3	IPR000767; Disease resistance protein IPR001611; Leucine-rich repeat IPR002182; NB-ARC	4	GO:0005515; protein binding; Molecular Function GO:0005524; ATP binding; Molecular Function GO:0006915; apoptosis; Biological Process GO:0006952; defense response; Biological Process	Disease resistance protein RPM1, putative (EC:3.1.3.16); K13457 disease resistance protein RPM1
Pa1	17801720	Pm002222	NA	NA	NA	NA	hypothetical protein LOC100255395; K12349 neutral ceramidase [EC:3.5.1.23]
Pa1	17801720	Pm002223	7	IPR000719; Protein kinase, catalytic domain IPR001245; Serine-threonine/tyrosine-protein kinase IPR002290; Serine/threonine-protein kinase domain IPR003613; U box domain IPR011009; Protein kinase-like domain IPR013083; Zinc finger, RING/FYVE/PHD-type IPR020635; Tyrosine-protein kinase, catalytic domain	7	GO:0000151; ubiquitin ligase complex; Cellular Component GO:0004672; protein kinase activity; Molecular Function GO:0004674; protein serine/threonine kinase activity; Molecular Function GO:0004842; ubiquitin-protein ligase activity; Molecular Function GO:0005524; ATP binding; Molecular Function GO:0006468; protein phosphorylation; Biological Process GO:0016567; protein ubiquitination; Biological …	protein kinase family protein; K04733 interleukin-1 receptor-associated kinase 4 [EC:2.7.11.1]
Pa1	18468830	Pm002294	NA	NA	NA	NA	NA
Pa1	18468830	Pm002295	1	IPR013256; Chromatin SPT2	NA	NA	NA
Pa1	18699909	Pm002327	5	IPR001356; Homeobox IPR003106; Leucine zipper, homeobox-associated IPR009057; Homeodomain-like IPR012287; Homeodomain-related IPR017970; Homeobox, conserved site	8	GO:0003677; DNA binding; Molecular Function GO:0003700; sequence-specific DNA binding transcription factor activity; Molecular Function GO:0005515; protein binding; Molecular Function GO:0005634; nucleus; Cellular Component GO:0006355; regulation of transcription, DNA-dependent; Biological Process GO:0030528; transcription regulator activity; Molecular Function GO:0043565; sequence-specific DNA b…	HAT22; HAT22; transcription factor; K09338 homeobox-leucine zipper protein
Pa1	18699909	Pm002328	NA	NA	NA	NA	NA
Pa1	18758750	Pm002333	NA	NA	NA	NA	NA
Pa1	18758750	Pm002334	2	IPR002885; Pentatricopeptide repeat IPR011990; Tetratricopeptide-like helical	1	GO:0005488; binding; Molecular Function	Cell division protein ftsH, putative (EC:3.6.4.3); K03798 cell division protease FtsH [EC:3.4.24.-]
Pa1	19067228	Pm002376	5	IPR003579; Ras small GTPase, Rab type IPR005225; Small GTP-binding protein IPR006687; Small GTPase SAR1-type IPR006688; ADP-ribosylation factor IPR006689; ARF/SAR superfamily	5	GO:0005525; GTP binding; Molecular Function GO:0005622; intracellular; Cellular Component GO:0006886; intracellular protein transport; Biological Process GO:0007264; small GTPase mediated signal transduction; Biological Process GO:0015031; protein transport; Biological Process	ATARLA1C (ADP-ribosylation factor-like A1C); GTP binding; K07977 Arf/Sar family, other
Pa1	19067228	Pm002377	NA	NA	NA	NA	NA
Pa1	19292278	Pm002404	1	IPR004883; Lateral organ boundaries, LOB	NA	NA	NA
Pa1	19292278	Pm002405	NA	NA	NA	NA	NA
Pa1	19345480	Pm002410	4	IPR000210; BTB/POZ-like IPR004249; NPH3 IPR011333; BTB/POZ fold IPR013069; BTB/POZ	3	GO:0004871; signal transducer activity; Molecular Function GO:0005515; protein binding; Molecular Function GO:0009416; response to light stimulus; Biological Process	NA
Pa1	19345480	Pm002411	NA	NA	NA	NA	NA
Pa1	19860026	Pm002488	2	IPR006514; Conserved hypothetical protein CHP01627 IPR021148; Protein of unknown function DUF579	NA	NA	NA
Pa1	19860026	Pm002489	6	IPR000719; Protein kinase, catalytic domain IPR001611; Leucine-rich repeat IPR002290; Serine/threonine-protein kinase domain IPR011009; Protein kinase-like domain IPR017442; Serine/threonine-protein kinase-like domain IPR020635; Tyrosine-protein kinase, catalytic domain	5	GO:0004672; protein kinase activity; Molecular Function GO:0004674; protein serine/threonine kinase activity; Molecular Function GO:0005515; protein binding; Molecular Function GO:0005524; ATP binding; Molecular Function GO:0006468; protein phosphorylation; Biological Process	serine/threonine-protein kinase bri1, putative (EC:2.7.11.25 3.1.3.16); K13415 protein brassinosteroid insensitive 1 [EC:2.7.10.1 2.7.11.1]
Pa1	20012732	Pm002513	2	IPR000326; Phosphatidic acid phosphatase type 2/haloperoxidase IPR016118; Phosphatidic acid phosphatase/chloroperoxidase, N-terminal	2	GO:0003824; catalytic activity; Molecular Function GO:0016020; membrane; Cellular Component	hypothetical protein; K07252 dolichyldiphosphatase [EC:3.6.1.43]
Pa1	20012732	Pm002514	3	IPR000225; Armadillo IPR011989; Armadillo-like helical IPR016024; Armadillo-type fold	2	GO:0005488; binding; Molecular Function GO:0005515; protein binding; Molecular Function	NA
Pa1	20050153	Pm002521	3	IPR000823; Plant peroxidase IPR002016; Haem peroxidase, plant/fungal/bacterial IPR010255; Haem peroxidase	4	GO:0004601; peroxidase activity; Molecular Function GO:0006979; response to oxidative stress; Biological Process GO:0020037; heme binding; Molecular Function GO:0055114; oxidation-reduction process; Biological Process	hypothetical protein LOC100256842; K00430 peroxidase [EC:1.11.1.7]
Pa1	20050153	Pm002522	1	IPR012881; Protein of unknown function DUF1685	NA	NA	NA
Pa1	21458205	Pm002778	11	IPR000719; Protein kinase, catalytic domain IPR001611; Leucine-rich repeat IPR002290; Serine/threonine-protein kinase domain IPR003591; Leucine-rich repeat, typical subtype IPR008271; Serine/threonine-protein kinase, active site IPR011009; Protein kinase-like domain IPR013210; Leucine-rich repeat-containing N-terminal, type 2 IPR013320; Concanavalin A-like lectin/glucanase, subgroup IPR017441; Pr…	5	GO:0004672; protein kinase activity; Molecular Function GO:0004674; protein serine/threonine kinase activity; Molecular Function GO:0005515; protein binding; Molecular Function GO:0005524; ATP binding; Molecular Function GO:0006468; protein phosphorylation; Biological Process	EFR; EFR (EF-TU RECEPTOR); ATP binding / kinase/ protein serine/threonine kinase; K13428 LRR receptor-like serine/threonine-protein kinase EFR [EC:2.7.11.1]
Pa1	21458205	Pm002779	NA	NA	NA	NA	NA
Pa1	21771426	Pm002841	2	IPR002136; Ribosomal protein L4/L1e IPR023574; Ribosomal protein L4 domain	3	GO:0003735; structural constituent of ribosome; Molecular Function GO:0005840; ribosome; Cellular Component GO:0006412; translation; Biological Process	hypothetical protein LOC100255110; K02930 large subunit ribosomal protein L4e

## Sheet: E-Pistil Number
PmID	PmPosition	gene	GENE_num	GENE	GO_num	GO	KEGG
Pa1	3023751	Pm000480	3	IPR011016; Zinc finger, RING-CH-type IPR013083; Zinc finger, RING/FYVE/PHD-type IPR018957; Zinc finger, C3HC4 RING-type	1	GO:0008270; zinc ion binding; Molecular Function	hypothetical protein; K10661 E3 ubiquitin-protein ligase MARCH6 [EC:6.3.2.19]
Pa1	3053576	Pm000486	4	IPR001245; Serine-threonine/tyrosine-protein kinase IPR002290; Serine/threonine-protein kinase domain IPR011009; Protein kinase-like domain IPR020635; Tyrosine-protein kinase, catalytic domain	4	GO:0004672; protein kinase activity; Molecular Function GO:0004674; protein serine/threonine kinase activity; Molecular Function GO:0005524; ATP binding; Molecular Function GO:0006468; protein phosphorylation; Biological Process	hypothetical protein; K14500 BR-signaling kinase [EC:2.7.11.1]
Pa1	3083407	Pm000490	1	IPR021916; Protein of unknown function DUF3527	NA	NA	NA
Pa1	3083407	Pm000491	2	IPR002068; Heat shock protein Hsp20 IPR008978; HSP20-like chaperone	NA	NA	hypothetical protein; K13993 HSP20 family protein
Pa1	4337047	Pm000715	1	IPR005202; Transcription factor GRAS	NA	NA	GAL1; GAI1-like E3 ubiquitin ligase protein; K14494 DELLA protein
Pa1	4337047	Pm000716	1	IPR005202; Transcription factor GRAS	NA	NA	GRAS86; DELLA domain GRAS family transcription factor, GA insensitive (GAI), GA1-3 1 (RGA1) repressor protein; K14494 DELLA protein
Pa1	4395757	Pm000723	1	IPR010742; Rab5-interacting	NA	NA	NA
Pa1	4461170	Pm000735	1	IPR002885; Pentatricopeptide repeat	NA	NA	nucleobase:cation symporter; K03457 nucleobase:cation symporter-1, NCS1 family
Pa1	4461170	Pm000736	9	IPR000719; Protein kinase, catalytic domain IPR002290; Serine/threonine-protein kinase domain IPR003527; MAP kinase, conserved site IPR008271; Serine/threonine-protein kinase, active site IPR008351; JNK MAP kinase IPR011009; Protein kinase-like domain IPR017441; Protein kinase, ATP binding site IPR017442; Serine/threonine-protein kinase-like domain IPR020635; Tyrosine-protein kinase, catalytic do…	5	GO:0004672; protein kinase activity; Molecular Function GO:0004674; protein serine/threonine kinase activity; Molecular Function GO:0004707; MAP kinase activity; Molecular Function GO:0005524; ATP binding; Molecular Function GO:0006468; protein phosphorylation; Biological Process	hypothetical protein LOC100251947; K04371 extracellular signal-regulated kinase 1/2 [EC:2.7.11.24]
Pa1	4476127	Pm000738	6	IPR002085; Alcohol dehydrogenase superfamily, zinc-containing IPR011032; GroES-like IPR013149; Alcohol dehydrogenase, C-terminal IPR013154; Alcohol dehydrogenase GroES-like IPR016040; NAD(P)-binding domain IPR020843; Polyketide synthase, enoylreductase	7	GO:0003824; catalytic activity; Molecular Function GO:0005488; binding; Molecular Function GO:0008152; metabolic process; Biological Process GO:0008270; zinc ion binding; Molecular Function GO:0016491; oxidoreductase activity; Molecular Function GO:0016747; transferase activity, transferring acyl groups other than amino-acyl groups; Molecular Function GO:0055114; oxidation-reduction process; Biol…	zinc binding dehydrogenase, putative (EC:1.3.1.38); K07512 mitochondrial trans-2-enoyl-CoA reductase [EC:1.3.1.38]
Pa1	4889533	Pm000799	4	IPR006044; 11-S seed storage protein, plant IPR006045; Cupin 1 IPR011051; Cupin, RmlC-type IPR014710; RmlC-like jelly roll fold	1	GO:0045735; nutrient reservoir activity; Molecular Function	NA
Pa1	5463963	Pm000904	NA	NA	NA	NA	NA
Pa1	5574265	Pm000916	1	IPR009395; GCN5-like 1	NA	NA	NA
Pa1	5574265	Pm000917	3	IPR002496; Phosphoribosyl-AMP cyclohydrolase IPR008179; Phosphoribosyl-ATP pyrophosphohydrolase IPR021130; Phosphoribosyl-ATP pyrophosphohydrolase-like	3	GO:0000105; histidine biosynthetic process; Biological Process GO:0004635; phosphoribosyl-AMP cyclohydrolase activity; Molecular Function GO:0004636; phosphoribosyl-ATP diphosphatase activity; Molecular Function	hypothetical protein LOC100258301; K11755 phosphoribosyl-ATP pyrophosphohydrolase / phosphoribosyl-AMP cyclohydrolase [EC:3.6.1.31 3.5.4.19]
Pa1	5939412	Pm000967	5	IPR002016; Haem peroxidase, plant/fungal/bacterial IPR002207; Plant ascorbate peroxidase IPR010255; Haem peroxidase IPR019793; Peroxidases heam-ligand binding site IPR019794; Peroxidase, active site	4	GO:0004601; peroxidase activity; Molecular Function GO:0006979; response to oxidative stress; Biological Process GO:0020037; heme binding; Molecular Function GO:0055114; oxidation-reduction process; Biological Process	hypothetical protein; K00434 L-ascorbate peroxidase [EC:1.11.1.11]
Pa1	5939412	Pm000968	1	IPR004147; ABC-1	NA	NA	Os04g0660200; K08869 aarF domain-containing kinase
Pa1	6063389	Pm000977	NA	NA	NA	NA	NA
Pa1	6063389	Pm000978	NA	NA	NA	NA	NA
Pa1	6139040	Pm000985	2	IPR001353; Proteasome, subunit alpha/beta IPR023333; Proteasome B-type subunit	3	GO:0004298; threonine-type endopeptidase activity; Molecular Function GO:0005839; proteasome core complex; Cellular Component GO:0051603; proteolysis involved in cellular protein catabolic process; Biological Process	hypothetical protein LOC100263853; K02736 20S proteasome subunit beta 7 [EC:3.4.25.1]
Pa1	6308538	Pm001006	1	IPR000782; FAS1 domain	NA	NA	NA
Pa1	6308538	Pm001007	1	IPR000782; FAS1 domain	NA	NA	NA
Pa1	8018784	Pm001211	1	IPR002100; Transcription factor, MADS-box	4	GO:0003700; sequence-specific DNA binding transcription factor activity; Molecular Function GO:0005634; nucleus; Cellular Component GO:0006355; regulation of transcription, DNA-dependent; Biological Process GO:0043565; sequence-specific DNA binding; Molecular Function	NA
Pa1	8018784	Pm001212	8	IPR001965; Zinc finger, PHD-type IPR004022; DDT domain IPR011011; Zinc finger, FYVE/PHD-type IPR013083; Zinc finger, RING/FYVE/PHD-type IPR018500; DDT domain, subgroup IPR018501; DDT domain superfamily IPR019786; Zinc finger, PHD-type, conserved site IPR019787; Zinc finger, PHD-finger	2	GO:0005515; protein binding; Molecular Function GO:0008270; zinc ion binding; Molecular Function	fetal alzheimer antigen, falz, putative (EC:2.3.1.48); K11728 nucleosome-remodeling factor subunit BPTF
Pa1	8283839	Pm001236	NA	NA	NA	NA	NA
Pa1	8283839	Pm001237	4	IPR000988; Ribosomal protein L24e IPR011017; TRASH IPR023441; Ribosomal protein L24e domain IPR023442; Ribosomal protein L24e, conserved site	3	GO:0003735; structural constituent of ribosome; Molecular Function GO:0005840; ribosome; Cellular Component GO:0006412; translation; Biological Process	hypothetical protein LOC100250021; K02896 large subunit ribosomal protein L24e
Pa1	9548333	Pm001366	NA	NA	NA	NA	NA
Pa1	9548333	Pm001367	2	IPR000058; Zinc finger, AN1-type IPR002653; Zinc finger, A20-type	2	GO:0003677; DNA binding; Molecular Function GO:0008270; zinc ion binding; Molecular Function	MGC52567; similar to testis-specific gene including a ubiquitin-likely domain; K12163 AN1-type zinc finger and ubiquitin domain-containing protein 1
Pa1	10005558	Pm001427	NA	NA	NA	NA	NA
Pa1	10005558	Pm001428	NA	NA	NA	NA	NA
Pa1	10117167	Pm001440	4	IPR002198; Short-chain dehydrogenase/reductase SDR IPR002347; Glucose/ribitol dehydrogenase IPR016040; NAD(P)-binding domain IPR020904; Short-chain dehydrogenase/reductase, conserved site	5	GO:0003824; catalytic activity; Molecular Function GO:0005488; binding; Molecular Function GO:0008152; metabolic process; Biological Process GO:0016491; oxidoreductase activity; Molecular Function GO:0055114; oxidation-reduction process; Biological Process	Os04g0179200; K13070 momilactone-A synthase [EC:1.1.1.295]
Pa1	10117167	Pm001441	4	IPR002198; Short-chain dehydrogenase/reductase SDR IPR002347; Glucose/ribitol dehydrogenase IPR016040; NAD(P)-binding domain IPR020904; Short-chain dehydrogenase/reductase, conserved site	5	GO:0003824; catalytic activity; Molecular Function GO:0005488; binding; Molecular Function GO:0008152; metabolic process; Biological Process GO:0016491; oxidoreductase activity; Molecular Function GO:0055114; oxidation-reduction process; Biological Process	Os04g0179200; K13070 momilactone-A synthase [EC:1.1.1.295]
Pa1	10150959	Pm001443	4	IPR001360; Glycoside hydrolase, family 1 IPR013781; Glycoside hydrolase, subgroup, catalytic core IPR017853; Glycoside hydrolase, superfamily IPR018120; Glycoside hydrolase, family 1, active site	4	GO:0003824; catalytic activity; Molecular Function GO:0004553; hydrolase activity, hydrolyzing O-glycosyl compounds; Molecular Function GO:0005975; carbohydrate metabolic process; Biological Process GO:0043169; cation binding; Molecular Function	beta-glucosidase, putative (EC:3.2.1.21); K01188 beta-glucosidase [EC:3.2.1.21]
Pa1	10150959	Pm001444	3	IPR001360; Glycoside hydrolase, family 1 IPR013781; Glycoside hydrolase, subgroup, catalytic core IPR017853; Glycoside hydrolase, superfamily	4	GO:0003824; catalytic activity; Molecular Function GO:0004553; hydrolase activity, hydrolyzing O-glycosyl compounds; Molecular Function GO:0005975; carbohydrate metabolic process; Biological Process GO:0043169; cation binding; Molecular Function	hypothetical protein; K01188 beta-glucosidase [EC:3.2.1.21]
Pa1	10267564	Pm001454	NA	NA	NA	NA	hypothetical protein; K11578 centromere/kinetochore protein ZW10
Pa1	10267564	Pm001455	1	IPR017498; Photosystem I PsaO	NA	NA	hypothetical protein; K14332 photosystem I subunit PsaO
Pa1	10279156	Pm001455	1	IPR017498; Photosystem I PsaO	NA	NA	hypothetical protein; K14332 photosystem I subunit PsaO
Pa1	10279156	Pm001456	3	IPR001327; Pyridine nucleotide-disulphide oxidoreductase, NAD-binding region IPR013027; FAD-dependent pyridine nucleotide-disulphide oxidoreductase IPR016040; NAD(P)-binding domain	6	GO:0003824; catalytic activity; Molecular Function GO:0005488; binding; Molecular Function GO:0008152; metabolic process; Biological Process GO:0016491; oxidoreductase activity; Molecular Function GO:0050660; flavin adenine dinucleotide binding; Molecular Function GO:0055114; oxidation-reduction process; Biological Process	AMID-like mitochondrial oxidoreductase (EC:1.-.-.-); K00540 [EC:1.-.-.-]
Pa1	10319172	Pm001460	3	IPR001344; Chlorophyll A-B binding protein, plant IPR022796; Chlorophyll A-B binding protein IPR023329; Chlorophyll a/b binding protein domain	2	GO:0009765; photosynthesis, light harvesting; Biological Process GO:0016020; membrane; Cellular Component	hypothetical protein LOC100250504; K08912 light-harvesting complex II chlorophyll a/b binding protein 1
Pa1	10319172	Pm001461	NA	NA	NA	NA	NA
Pa1	10329159	Pm001461	NA	NA	NA	NA	NA
Pa1	10329159	Pm001462	1	IPR020683; Ankyrin repeat-containing domain	NA	NA	NA
Pa1	10333752	Pm001461	NA	NA	NA	NA	NA
Pa1	10333752	Pm001462	1	IPR020683; Ankyrin repeat-containing domain	NA	NA	NA
Pa1	10380660	Pm001466	NA	NA	NA	NA	NA
Pa1	10380660	Pm001467	1	IPR003441; No apical meristem (NAM) protein	2	GO:0003677; DNA binding; Molecular Function GO:0045449; regulation of transcription; Biological Process	NA
Pa1	10381516	Pm001466	NA	NA	NA	NA	NA
Pa1	10381516	Pm001467	1	IPR003441; No apical meristem (NAM) protein	2	GO:0003677; DNA binding; Molecular Function GO:0045449; regulation of transcription; Biological Process	NA
Pa1	10572845	Pm001489	1	IPR021410; Protein of unknown function DUF3049	NA	NA	NA
Pa1	10572845	Pm001490	7	IPR005833; Haloacid dehydrogenase/epoxide hydrolase IPR005834; Haloacid dehalogenase-like hydrolase IPR006402; HAD-superfamily hydrolase, subfamily IA, variant 3 IPR015865; Riboflavin kinase domain, bacterial/eukaryotic IPR023214; HAD-like domain IPR023465; Riboflavin kinase domain IPR023468; Riboflavin kinase	5	GO:0003824; catalytic activity; Molecular Function GO:0008152; metabolic process; Biological Process GO:0008531; riboflavin kinase activity; Molecular Function GO:0009231; riboflavin biosynthetic process; Biological Process GO:0016787; hydrolase activity; Molecular Function	riboflavin kinase (EC:2.7.1.26); K00861 riboflavin kinase [EC:2.7.1.26]
Pa1	10584896	Pm001489	1	IPR021410; Protein of unknown function DUF3049	NA	NA	NA
Pa1	10584896	Pm001490	7	IPR005833; Haloacid dehydrogenase/epoxide hydrolase IPR005834; Haloacid dehalogenase-like hydrolase IPR006402; HAD-superfamily hydrolase, subfamily IA, variant 3 IPR015865; Riboflavin kinase domain, bacterial/eukaryotic IPR023214; HAD-like domain IPR023465; Riboflavin kinase domain IPR023468; Riboflavin kinase	5	GO:0003824; catalytic activity; Molecular Function GO:0008152; metabolic process; Biological Process GO:0008531; riboflavin kinase activity; Molecular Function GO:0009231; riboflavin biosynthetic process; Biological Process GO:0016787; hydrolase activity; Molecular Function	riboflavin kinase (EC:2.7.1.26); K00861 riboflavin kinase [EC:2.7.1.26]
Pa1	10614292	Pm001491	2	IPR007900; Transcription initiation factor TFIID component TAF4 IPR022003; RST domain of plant C-terminal	3	GO:0005669; transcription factor TFIID complex; Cellular Component GO:0006352; transcription initiation, DNA-dependent; Biological Process GO:0016986; transcription initiation factor activity; Molecular Function	NA
Pa1	10637898	Pm001493	1	IPR002885; Pentatricopeptide repeat	NA	NA	Cell division protein ftsH, putative (EC:3.6.4.3); K03798 cell division protease FtsH [EC:3.4.24.-]
Pa1	10637898	Pm001494	2	IPR002885; Pentatricopeptide repeat IPR011990; Tetratricopeptide-like helical	1	GO:0005488; binding; Molecular Function	Cell division protein ftsH, putative (EC:3.6.4.3); K03798 cell division protease FtsH [EC:3.4.24.-]
Pa1	10721483	Pm001502	1	IPR020966; Malate transporter, aliminium toerance	1	GO:0010044; response to aluminum ion; Biological Process	NA
Pa1	10852785	Pm001509	NA	NA	NA	NA	hypothetical protein; K00703 starch synthase [EC:2.4.1.21]
Pa1	10852785	Pm001510	NA	NA	NA	NA	NA
Pa1	11019702	Pm001524	NA	NA	NA	NA	NA
Pa1	11019702	Pm001525	NA	NA	NA	NA	NA
Pa1	11051068	Pm001528	4	IPR000719; Protein kinase, catalytic domain IPR001245; Serine-threonine/tyrosine-protein kinase IPR011009; Protein kinase-like domain IPR020635; Tyrosine-protein kinase, catalytic domain	3	GO:0004672; protein kinase activity; Molecular Function GO:0005524; ATP binding; Molecular Function GO:0006468; protein phosphorylation; Biological Process	Os02g0513000; K13430 serine/threonine-protein kinase PBS1 [EC:2.7.11.1]
Pa1	11147554	Pm001540	NA	NA	NA	NA	NA
Pa1	11147554	Pm001541	3	IPR001394; Peptidase C19, ubiquitin carboxyl-terminal hydrolase 2 IPR006615; Peptidase C19, ubiquitin-specific peptidase, DUSP domain IPR018200; Peptidase C19, ubiquitin carboxyl-terminal hydrolase 2, conserved site	2	GO:0004221; ubiquitin thiolesterase activity; Molecular Function GO:0006511; ubiquitin-dependent protein catabolic process; Biological Process	Ubiquitin carboxyl-terminal hydrolase, putative (EC:3.1.2.15); K11835 ubiquitin carboxyl-terminal hydrolase 4/11/15 [EC:3.1.2.15]
Pa1	11477446	Pm001574	5	IPR001394; Peptidase C19, ubiquitin carboxyl-terminal hydrolase 2 IPR002083; MATH IPR008974; TRAF-like IPR013322; TRAF-type IPR018200; Peptidase C19, ubiquitin carboxyl-terminal hydrolase 2, conserved site	3	GO:0004221; ubiquitin thiolesterase activity; Molecular Function GO:0005515; protein binding; Molecular Function GO:0006511; ubiquitin-dependent protein catabolic process; Biological Process	hypothetical protein LOC100266796; K11838 ubiquitin carboxyl-terminal hydrolase 7 [EC:3.1.2.15]
Pa1	11593973	Pm001586	NA	NA	NA	NA	NA
Pa1	11593973	Pm001587	3	IPR001764; Glycoside hydrolase, family 3, N-terminal IPR002772; Glycoside hydrolase, family 3, C-terminal IPR017853; Glycoside hydrolase, superfamily	2	GO:0004553; hydrolase activity, hydrolyzing O-glycosyl compounds; Molecular Function GO:0005975; carbohydrate metabolic process; Biological Process	hypothetical protein LOC100255282; K01188 beta-glucosidase [EC:3.2.1.21]
Pa1	11651404	Pm001595	3	IPR001764; Glycoside hydrolase, family 3, N-terminal IPR002772; Glycoside hydrolase, family 3, C-terminal IPR017853; Glycoside hydrolase, superfamily	2	GO:0004553; hydrolase activity, hydrolyzing O-glycosyl compounds; Molecular Function GO:0005975; carbohydrate metabolic process; Biological Process	hypothetical protein LOC100255282; K01188 beta-glucosidase [EC:3.2.1.21]
Pa1	11651404	Pm001596	NA	NA	NA	NA	NA
Pa1	11688798	Pm001597	2	IPR000209; Peptidase S8/S53, subtilisin/kexin/sedolisin IPR015500; Peptidase S8, subtilisin-related	2	GO:0004252; serine-type endopeptidase activity; Molecular Function GO:0006508; proteolysis; Biological Process	NA
Pa1	12065801	Pm001647	5	IPR001453; Molybdopterin binding IPR005110; MoeA, N-terminal and linker domain IPR005111; MoeA, C-terminal, domain IV IPR008284; Molybdenum cofactor biosynthesis, conserved site IPR020817; Molybdenum cofactor synthesis	2	GO:0006777; Mo-molybdopterin cofactor biosynthetic process; Biological Process GO:0032324; molybdopterin cofactor biosynthetic process; Biological Process	molybdopterin biosynthesis protein, putative; K03750 molybdopterin biosynthesis protein MoeA
Pa1	12290991	Pm001666	3	IPR006607; Protein of unknown function DM15 IPR006630; RNA-binding protein Lupus La IPR011991; Winged helix-turn-helix transcription repressor DNA-binding	NA	NA	ssb, wu:fb17f11, zgc:55588; Sjogren syndrome antigen B (autoantigen La); K11090 lupus La protein
Pa1	12352069	Pm001670	NA	NA	NA	NA	NA
Pa1	12352069	Pm001671	2	IPR004827; Basic-leucine zipper (bZIP) transcription factor IPR011616; bZIP transcription factor, bZIP-1	4	GO:0003700; sequence-specific DNA binding transcription factor activity; Molecular Function GO:0006355; regulation of transcription, DNA-dependent; Biological Process GO:0043565; sequence-specific DNA binding; Molecular Function GO:0046983; protein dimerization activity; Molecular Function	hypothetical protein; K14432 ABA responsive element binding factor
Pa1	12450740	Pm001680	6	IPR000719; Protein kinase, catalytic domain IPR001245; Serine-threonine/tyrosine-protein kinase IPR002290; Serine/threonine-protein kinase domain IPR008271; Serine/threonine-protein kinase, active site IPR011009; Protein kinase-like domain IPR020635; Tyrosine-protein kinase, catalytic domain	4	GO:0004672; protein kinase activity; Molecular Function GO:0004674; protein serine/threonine kinase activity; Molecular Function GO:0005524; ATP binding; Molecular Function GO:0006468; protein phosphorylation; Biological Process	hypothetical protein; K04733 interleukin-1 receptor-associated kinase 4 [EC:2.7.11.1]
Pa1	12450740	Pm001681	NA	NA	NA	NA	hypothetical protein LOC100251380; K10880 DNA-repair protein XRCC3
Pa1	12567685	Pm001692	NA	NA	NA	NA	NA
Pa1	12567685	Pm001693	2	IPR008985; Concanavalin A-like lectin/glucanase IPR014895; Alginate lyase 2	NA	NA	NA
Pa1	12585849	Pm001694	7	IPR002085; Alcohol dehydrogenase superfamily, zinc-containing IPR002328; Alcohol dehydrogenase, zinc-containing, conserved site IPR011032; GroES-like IPR013149; Alcohol dehydrogenase, C-terminal IPR013154; Alcohol dehydrogenase GroES-like IPR016040; NAD(P)-binding domain IPR020843; Polyketide synthase, enoylreductase	7	GO:0003824; catalytic activity; Molecular Function GO:0005488; binding; Molecular Function GO:0008152; metabolic process; Biological Process GO:0008270; zinc ion binding; Molecular Function GO:0016491; oxidoreductase activity; Molecular Function GO:0016747; transferase activity, transferring acyl groups other than amino-acyl groups; Molecular Function GO:0055114; oxidation-reduction process; Biol…	hypothetical protein LOC100245522; K00083 cinnamyl-alcohol dehydrogenase [EC:1.1.1.195]
Pa1	12585849	Pm001695	2	IPR002938; Monooxygenase, FAD-binding IPR003042; Aromatic-ring hydroxylase-like	4	GO:0004497; monooxygenase activity; Molecular Function GO:0008152; metabolic process; Biological Process GO:0016491; oxidoreductase activity; Molecular Function GO:0055114; oxidation-reduction process; Biological Process	AO090003000349; salicylate 1-monooxygenase SalA; K00480 salicylate hydroxylase [EC:1.14.13.1]
Pa1	13094593	Pm001741	1	IPR002775; DNA/RNA-binding protein Alba-like	1	GO:0003676; nucleic acid binding; Molecular Function	hypothetical protein; K14525 ribonucleases P/MRP protein subunit RPP25 [EC:3.1.26.5]
Pa1	13151308	Pm001746	3	IPR004123; mRNA splicing factor, thioredoxin-like U5 snRNP IPR012335; Thioredoxin fold IPR012336; Thioredoxin-like fold	2	GO:0005681; spliceosomal complex; Cellular Component GO:0007067; mitosis; Biological Process	pco104916; LOC100282486; K12859 U5 snRNP protein, DIM1 family
Pa1	13151308	Pm001747	NA	NA	NA	NA	NA
Pa1	13334690	Pm001763	1	IPR003746; Protein of unknown function DUF167	NA	NA	hypothetical protein LOC100259033; K09131 hypothetical protein
Pa1	13334690	Pm001764	8	IPR000719; Protein kinase, catalytic domain IPR000858; S-locus glycoprotein IPR001245; Serine-threonine/tyrosine-protein kinase IPR001480; Bulb-type lectin domain IPR002290; Serine/threonine-protein kinase domain IPR011009; Protein kinase-like domain IPR017441; Protein kinase, ATP binding site IPR020635; Tyrosine-protein kinase, catalytic domain	6	GO:0004672; protein kinase activity; Molecular Function GO:0004674; protein serine/threonine kinase activity; Molecular Function GO:0005524; ATP binding; Molecular Function GO:0005529; sugar binding; Molecular Function GO:0006468; protein phosphorylation; Biological Process GO:0048544; recognition of pollen; Biological Process	receptor serine-threonine protein kinase, putative (EC:2.7.10.2); K04733 interleukin-1 receptor-associated kinase 4 [EC:2.7.11.1]
Pa1	13542522	Pm001787	NA	NA	NA	NA	NA
Pa1	13542522	Pm001788	NA	NA	NA	NA	NA
Pa1	13578351	Pm001792	2	IPR000915; Ribosomal protein L6E IPR014722; Translation protein SH3-like, subgroup	4	GO:0003735; structural constituent of ribosome; Molecular Function GO:0005622; intracellular; Cellular Component GO:0005840; ribosome; Cellular Component GO:0006412; translation; Biological Process	60S ribosomal protein L6, putative; K02934 large subunit ribosomal protein L6e
Pa1	13578351	Pm001793	NA	NA	NA	NA	NA
Pa1	13590547	Pm001794	NA	NA	NA	NA	NA
Pa1	13590547	Pm001795	NA	NA	NA	NA	NA
Pa1	13960202	Pm001823	3	IPR000361; FeS cluster biogenesis IPR016092; FeS cluster insertion IPR017870; FeS cluster insertion, C-terminal, conserved site	3	GO:0005198; structural molecule activity; Molecular Function GO:0016226; iron-sulfur cluster assembly; Biological Process GO:0051536; iron-sulfur cluster binding; Molecular Function	hypothetical protein LOC100249101; K13628 iron-sulfur cluster assembly protein
Pa1	14012124	Pm001830	NA	NA	NA	NA	NA
Pa1	14012124	Pm001831	3	IPR005570; RNA polymerase, Rpb8 IPR012340; Nucleic acid-binding, OB-fold IPR016027; Nucleic acid-binding, OB-fold-like	1	GO:0006350; transcription; Biological Process	Os03g0845700; K03016 DNA-directed RNA polymerases I, II, and III subunit RPABC3
Pa1	14081062	Pm001836	3	IPR000891; Pyruvate carboxyltransferase IPR002034; Alpha-isopropylmalate/homocitrate synthase, conserved site IPR013785; Aldolase-type TIM barrel	4	GO:0003824; catalytic activity; Molecular Function GO:0008152; metabolic process; Biological Process GO:0019752; carboxylic acid metabolic process; Biological Process GO:0046912; transferase activity, transferring acyl groups, acyl groups converted into alkyl on transfer; Molecular Function	isopropylmalate synthase, putative (EC:2.3.3.13); K01649 2-isopropylmalate synthase [EC:2.3.3.13]
Pa1	14081062	Pm001837	NA	NA	NA	NA	NA
Pa1	14142311	Pm001843	NA	NA	NA	NA	NA
Pa1	14142311	Pm001844	NA	NA	NA	NA	NA
Pa1	14176659	Pm001848	1	IPR006121; Heavy metal transport/detoxification protein	2	GO:0030001; metal ion transport; Biological Process GO:0046872; metal ion binding; Molecular Function	NA
Pa1	14176659	Pm001849	NA	NA	NA	NA	NA
Pa1	14460013	Pm001871	NA	NA	NA	NA	NA
Pa1	14460013	Pm001872	1	IPR003653; Peptidase C48, SUMO/Sentrin/Ubl1	2	GO:0006508; proteolysis; Biological Process GO:0008234; cysteine-type peptidase activity; Molecular Function	NA
Pa1	14832969	Pm001911	NA	NA	NA	NA	NA
Pa1	14832969	Pm001912	1	IPR000620; Drug/metabolite transporter	1	GO:0016020; membrane; Cellular Component	NA
Pa1	14833265	Pm001911	NA	NA	NA	NA	NA
Pa1	14833265	Pm001912	1	IPR000620; Drug/metabolite transporter	1	GO:0016020; membrane; Cellular Component	NA
Pa1	14905204	Pm001916	2	IPR000767; Disease resistance protein IPR002182; NB-ARC	3	GO:0005524; ATP binding; Molecular Function GO:0006915; apoptosis; Biological Process GO:0006952; defense response; Biological Process	hypothetical protein LOC100258314; K01164 ribonuclease P/MRP protein subunit POP1 [EC:3.1.26.5]
Pa1	14986688	Pm001926	6	IPR001117; Multicopper oxidase, type 1 IPR002355; Multicopper oxidase, copper-binding site IPR008972; Cupredoxin IPR011706; Multicopper oxidase, type 2 IPR011707; Multicopper oxidase, type 3 IPR017760; L-ascorbate oxidase, plants	5	GO:0005507; copper ion binding; Molecular Function GO:0005576; extracellular region; Cellular Component GO:0008447; L-ascorbate oxidase activity; Molecular Function GO:0016491; oxidoreductase activity; Molecular Function GO:0055114; oxidation-reduction process; Biological Process	hypothetical protein LOC100251280; K00423 L-ascorbate oxidase [EC:1.10.3.3]
Pa1	15048954	Pm001932	NA	NA	NA	NA	NA
Pa1	15048954	Pm001933	1	IPR003653; Peptidase C48, SUMO/Sentrin/Ubl1	2	GO:0006508; proteolysis; Biological Process GO:0008234; cysteine-type peptidase activity; Molecular Function	NA
Pa1	15064468	Pm001934	NA	NA	NA	NA	hypothetical protein; K03036 26S proteasome regulatory subunit N6
Pa1	15064468	Pm001935	3	IPR001623; Heat shock protein DnaJ, N-terminal IPR003095; Heat shock protein DnaJ IPR018253; Heat shock protein DnaJ, conserved site	3	GO:0006457; protein folding; Biological Process GO:0031072; heat shock protein binding; Molecular Function GO:0051082; unfolded protein binding; Molecular Function	hypothetical protein ; K09510 DnaJ homolog subfamily B member 4
Pa1	15134278	Pm001938	2	IPR004147; ABC-1 IPR011009; Protein kinase-like domain	NA	NA	Os09g0250700; K08869 aarF domain-containing kinase
Pa1	15210911	Pm001948	3	IPR000595; Cyclic nucleotide-binding domain IPR014710; RmlC-like jelly roll fold IPR018490; Cyclic nucleotide-binding-like	NA	NA	ATCNGC3 (CYCLIC NUCLEOTIDE GATED CHANNEL 3); calmodulin binding / cyclic nucleotide binding / ion channel; K05391 cyclic nucleotide gated channel, other eukaryote
Pa1	15210911	Pm001949	3	IPR000595; Cyclic nucleotide-binding domain IPR014710; RmlC-like jelly roll fold IPR018490; Cyclic nucleotide-binding-like	NA	NA	CNGC1; CNGC1 (CYCLIC NUCLEOTIDE GATED CHANNEL 1); calmodulin binding / cation channel/ cyclic nucleotide binding / intracellular cyclic nucleotide activated cation channel/ inward rectifier potassium channel; K05391 cyclic nucleotide gated channel, other eukaryote
Pa1	15280114	Pm001955	NA	NA	NA	NA	NA
Pa1	15280114	Pm001956	NA	NA	NA	NA	NA
Pa1	15348400	Pm001959	2	IPR001024; Lipoxygenase, LH2 IPR008976; Lipase/lipooxygenase, PLAT/LH2	1	GO:0005515; protein binding; Molecular Function	NA
Pa1	15348400	Pm001960	5	IPR001440; Tetratricopeptide TPR-1 IPR011990; Tetratricopeptide-like helical IPR013026; Tetratricopeptide repeat-containing IPR013105; Tetratricopeptide TPR2 IPR019734; Tetratricopeptide repeat	2	GO:0005488; binding; Molecular Function GO:0005515; protein binding; Molecular Function	AGAP008985-PA; K09527 DnaJ homolog subfamily C member 7
Pa1	15744912	Pm002007	5	IPR000048; IQ motif, EF-hand binding site IPR002909; Cell surface receptor IPT/TIG IPR005559; CG-1 IPR013783; Immunoglobulin-like fold IPR014756; Immunoglobulin E-set	5	GO:0005515; protein binding; Molecular Function GO:0005516; calmodulin binding; Molecular Function GO:0005634; nucleus; Cellular Component GO:0030528; transcription regulator activity; Molecular Function GO:0045449; regulation of transcription; Biological Process	NA
Pa1	15913530	Pm002029	NA	NA	NA	NA	NA
Pa1	15913530	Pm002030	NA	NA	NA	NA	NA
Pa1	16032064	Pm002042	NA	NA	NA	NA	NA
Pa1	16032064	Pm002043	NA	NA	NA	NA	NA
Pa1	16044018	Pm002043	NA	NA	NA	NA	NA
Pa1	16044018	Pm002044	2	IPR001611; Leucine-rich repeat IPR011713; Leucine-rich repeat 3	1	GO:0005515; protein binding; Molecular Function	ATP binding / protein binding; K06685 maintenance of ploidy protein MOB1 (MPS1 binder 1)
Pa1	16778275	Pm002119	2	IPR005814; Aminotransferase class-III IPR015421; Pyridoxal phosphate-dependent transferase, major region, subdomain 1	3	GO:0003824; catalytic activity; Molecular Function GO:0008483; transaminase activity; Molecular Function GO:0030170; pyridoxal phosphate binding; Molecular Function	hypothetical protein; K00833 adenosylmethionine-8-amino-7-oxononanoate aminotransferase [EC:2.6.1.62]
Pa1	16778275	Pm002120	3	IPR001841; Zinc finger, RING-type IPR013083; Zinc finger, RING/FYVE/PHD-type IPR018957; Zinc finger, C3HC4 RING-type	2	GO:0005515; protein binding; Molecular Function GO:0008270; zinc ion binding; Molecular Function	zgc:158807; K11982 E3 ubiquitin-protein ligase RNF115/126 [EC:6.3.2.19]
Pa1	16907794	Pm002129	1	IPR002528; Multi antimicrobial extrusion protein	5	GO:0006855; drug transmembrane transport; Biological Process GO:0015238; drug transmembrane transporter activity; Molecular Function GO:0015297; antiporter activity; Molecular Function GO:0016020; membrane; Cellular Component GO:0055085; transmembrane transport; Biological Process	NA
Pa1	16907794	Pm002130	NA	NA	NA	NA	NA
Pa1	16921488	Pm002130	NA	NA	NA	NA	NA
Pa1	16921488	Pm002131	NA	NA	NA	NA	NA
Pa1	17164402	Pm002165	2	IPR001752; Kinesin, motor domain IPR019821; Kinesin, motor region, conserved site	3	GO:0003777; microtubule motor activity; Molecular Function GO:0005524; ATP binding; Molecular Function GO:0007018; microtubule-based movement; Biological Process	ATP binding protein, putative; K10406 kinesin family member C2/C3
Pa1	17372936	Pm002178	1	IPR019557; Aminotransferase-like, plant mobile domain	NA	NA	NA
Pa1	17372936	Pm002179	3	IPR000767; Disease resistance protein IPR001611; Leucine-rich repeat IPR002182; NB-ARC	4	GO:0005515; protein binding; Molecular Function GO:0005524; ATP binding; Molecular Function GO:0006915; apoptosis; Biological Process GO:0006952; defense response; Biological Process	Disease resistance protein RPM1, putative (EC:3.1.3.16); K13457 disease resistance protein RPM1
Pa1	17801720	Pm002222	NA	NA	NA	NA	hypothetical protein LOC100255395; K12349 neutral ceramidase [EC:3.5.1.23]
Pa1	17801720	Pm002223	7	IPR000719; Protein kinase, catalytic domain IPR001245; Serine-threonine/tyrosine-protein kinase IPR002290; Serine/threonine-protein kinase domain IPR003613; U box domain IPR011009; Protein kinase-like domain IPR013083; Zinc finger, RING/FYVE/PHD-type IPR020635; Tyrosine-protein kinase, catalytic domain	7	GO:0000151; ubiquitin ligase complex; Cellular Component GO:0004672; protein kinase activity; Molecular Function GO:0004674; protein serine/threonine kinase activity; Molecular Function GO:0004842; ubiquitin-protein ligase activity; Molecular Function GO:0005524; ATP binding; Molecular Function GO:0006468; protein phosphorylation; Biological Process GO:0016567; protein ubiquitination; Biological …	protein kinase family protein; K04733 interleukin-1 receptor-associated kinase 4 [EC:2.7.11.1]
Pa1	18468830	Pm002294	NA	NA	NA	NA	NA
Pa1	18468830	Pm002295	1	IPR013256; Chromatin SPT2	NA	NA	NA
Pa1	18699909	Pm002327	5	IPR001356; Homeobox IPR003106; Leucine zipper, homeobox-associated IPR009057; Homeodomain-like IPR012287; Homeodomain-related IPR017970; Homeobox, conserved site	8	GO:0003677; DNA binding; Molecular Function GO:0003700; sequence-specific DNA binding transcription factor activity; Molecular Function GO:0005515; protein binding; Molecular Function GO:0005634; nucleus; Cellular Component GO:0006355; regulation of transcription, DNA-dependent; Biological Process GO:0030528; transcription regulator activity; Molecular Function GO:0043565; sequence-specific DNA b…	HAT22; HAT22; transcription factor; K09338 homeobox-leucine zipper protein
Pa1	18699909	Pm002328	NA	NA	NA	NA	NA
Pa1	18758750	Pm002333	NA	NA	NA	NA	NA
Pa1	18758750	Pm002334	2	IPR002885; Pentatricopeptide repeat IPR011990; Tetratricopeptide-like helical	1	GO:0005488; binding; Molecular Function	Cell division protein ftsH, putative (EC:3.6.4.3); K03798 cell division protease FtsH [EC:3.4.24.-]
Pa1	19067228	Pm002376	5	IPR003579; Ras small GTPase, Rab type IPR005225; Small GTP-binding protein IPR006687; Small GTPase SAR1-type IPR006688; ADP-ribosylation factor IPR006689; ARF/SAR superfamily	5	GO:0005525; GTP binding; Molecular Function GO:0005622; intracellular; Cellular Component GO:0006886; intracellular protein transport; Biological Process GO:0007264; small GTPase mediated signal transduction; Biological Process GO:0015031; protein transport; Biological Process	ATARLA1C (ADP-ribosylation factor-like A1C); GTP binding; K07977 Arf/Sar family, other
Pa1	19067228	Pm002377	NA	NA	NA	NA	NA
Pa1	19345480	Pm002410	4	IPR000210; BTB/POZ-like IPR004249; NPH3 IPR011333; BTB/POZ fold IPR013069; BTB/POZ	3	GO:0004871; signal transducer activity; Molecular Function GO:0005515; protein binding; Molecular Function GO:0009416; response to light stimulus; Biological Process	NA
Pa1	19345480	Pm002411	NA	NA	NA	NA	NA
Pa1	19860026	Pm002488	2	IPR006514; Conserved hypothetical protein CHP01627 IPR021148; Protein of unknown function DUF579	NA	NA	NA
Pa1	19860026	Pm002489	6	IPR000719; Protein kinase, catalytic domain IPR001611; Leucine-rich repeat IPR002290; Serine/threonine-protein kinase domain IPR011009; Protein kinase-like domain IPR017442; Serine/threonine-protein kinase-like domain IPR020635; Tyrosine-protein kinase, catalytic domain	5	GO:0004672; protein kinase activity; Molecular Function GO:0004674; protein serine/threonine kinase activity; Molecular Function GO:0005515; protein binding; Molecular Function GO:0005524; ATP binding; Molecular Function GO:0006468; protein phosphorylation; Biological Process	serine/threonine-protein kinase bri1, putative (EC:2.7.11.25 3.1.3.16); K13415 protein brassinosteroid insensitive 1 [EC:2.7.10.1 2.7.11.1]
Pa1	20050153	Pm002521	3	IPR000823; Plant peroxidase IPR002016; Haem peroxidase, plant/fungal/bacterial IPR010255; Haem peroxidase	4	GO:0004601; peroxidase activity; Molecular Function GO:0006979; response to oxidative stress; Biological Process GO:0020037; heme binding; Molecular Function GO:0055114; oxidation-reduction process; Biological Process	hypothetical protein LOC100256842; K00430 peroxidase [EC:1.11.1.7]
Pa1	20050153	Pm002522	1	IPR012881; Protein of unknown function DUF1685	NA	NA	NA
Pa1	21771426	Pm002841	2	IPR002136; Ribosomal protein L4/L1e IPR023574; Ribosomal protein L4 domain	3	GO:0003735; structural constituent of ribosome; Molecular Function GO:0005840; ribosome; Cellular Component GO:0006412; translation; Biological Process	hypothetical protein LOC100255110; K02930 large subunit ribosomal protein L4e

## Sheet: F-Blossom Bud Number
PmID	PmPosition	gene	GENE_num	GENE	GO_num	GO	KEGG
Pa1	4461170	Pm000735	1	IPR002885; Pentatricopeptide repeat	NA	NA	nucleobase:cation symporter; K03457 nucleobase:cation symporter-1, NCS1 family
Pa1	4461170	Pm000736	9	IPR000719; Protein kinase, catalytic domain IPR002290; Serine/threonine-protein kinase domain IPR003527; MAP kinase, conserved site IPR008271; Serine/threonine-protein kinase, active site IPR008351; JNK MAP kinase IPR011009; Protein kinase-like domain IPR017441; Protein kinase, ATP binding site IPR017442; Serine/threonine-protein kinase-like domain IPR020635; Tyrosine-protein kinase, catalytic do…	5	GO:0004672; protein kinase activity; Molecular Function GO:0004674; protein serine/threonine kinase activity; Molecular Function GO:0004707; MAP kinase activity; Molecular Function GO:0005524; ATP binding; Molecular Function GO:0006468; protein phosphorylation; Biological Process	hypothetical protein LOC100251947; K04371 extracellular signal-regulated kinase 1/2 [EC:2.7.11.24]
Pa1	8018784	Pm001211	1	IPR002100; Transcription factor, MADS-box	4	GO:0003700; sequence-specific DNA binding transcription factor activity; Molecular Function GO:0005634; nucleus; Cellular Component GO:0006355; regulation of transcription, DNA-dependent; Biological Process GO:0043565; sequence-specific DNA binding; Molecular Function	NA
Pa1	8018784	Pm001212	8	IPR001965; Zinc finger, PHD-type IPR004022; DDT domain IPR011011; Zinc finger, FYVE/PHD-type IPR013083; Zinc finger, RING/FYVE/PHD-type IPR018500; DDT domain, subgroup IPR018501; DDT domain superfamily IPR019786; Zinc finger, PHD-type, conserved site IPR019787; Zinc finger, PHD-finger	2	GO:0005515; protein binding; Molecular Function GO:0008270; zinc ion binding; Molecular Function	fetal alzheimer antigen, falz, putative (EC:2.3.1.48); K11728 nucleosome-remodeling factor subunit BPTF
Pa1	8853332	Pm001300	NA	NA	NA	NA	NA
Pa1	8853332	Pm001301	4	IPR000266; Ribosomal protein S17 IPR012340; Nucleic acid-binding, OB-fold IPR016027; Nucleic acid-binding, OB-fold-like IPR019984; Ribosomal protein S17, bacterial-type	4	GO:0003735; structural constituent of ribosome; Molecular Function GO:0005622; intracellular; Cellular Component GO:0005840; ribosome; Cellular Component GO:0006412; translation; Biological Process	hypothetical protein; K02961 small subunit ribosomal protein S17
Pa1	10085567	Pm001434	1	IPR004864; Late embryogenesis abundant protein, group 2	NA	NA	NA
Pa1	10085567	Pm001435	2	IPR011009; Protein kinase-like domain IPR017441; Protein kinase, ATP binding site	3	GO:0004672; protein kinase activity; Molecular Function GO:0005524; ATP binding; Molecular Function GO:0006468; protein phosphorylation; Biological Process	NA
Pa4	19680281	Pm015472	NA	NA	NA	NA	NA
Pa4	19680281	Pm015473	6	IPR001357; BRCT IPR001841; Zinc finger, RING-type IPR011011; Zinc finger, FYVE/PHD-type IPR013083; Zinc finger, RING/FYVE/PHD-type IPR017907; Zinc finger, RING-type, conserved site IPR018957; Zinc finger, C3HC4 RING-type	3	GO:0005515; protein binding; Molecular Function GO:0005622; intracellular; Cellular Component GO:0008270; zinc ion binding; Molecular Function	mutagen-sensitive, putative ; K10728 topoisomerase (DNA) II binding protein 1
Pa6	6821921	Pm021122	1	IPR001563; Peptidase S10, serine carboxypeptidase	2	GO:0004185; serine-type carboxypeptidase activity; Molecular Function GO:0006508; proteolysis; Biological Process	SCPL19; SCPL19; serine-type carboxypeptidase/ sinapoyltransferase; K09756 serine carboxypeptidase-like 19 [EC:3.4.16.- 2.3.1.91]
Pa6	6821921	Pm021123	1	IPR001563; Peptidase S10, serine carboxypeptidase	2	GO:0004185; serine-type carboxypeptidase activity; Molecular Function GO:0006508; proteolysis; Biological Process	SCPL19; SCPL19; serine-type carboxypeptidase/ sinapoyltransferase; K09756 serine carboxypeptidase-like 19 [EC:3.4.16.- 2.3.1.91]
Pa6	7530393	Pm021241	2	IPR011028; Cyclin-like IPR013763; Cyclin-related	NA	NA	cyclin A, putative; K06627 cyclin A
Pa6	7530393	Pm021242	8	IPR001356; Homeobox IPR001965; Zinc finger, PHD-type IPR009057; Homeodomain-like IPR011011; Zinc finger, FYVE/PHD-type IPR012287; Homeodomain-related IPR013083; Zinc finger, RING/FYVE/PHD-type IPR019786; Zinc finger, PHD-type, conserved site IPR019787; Zinc finger, PHD-finger	7	GO:0003677; DNA binding; Molecular Function GO:0003700; sequence-specific DNA binding transcription factor activity; Molecular Function GO:0005515; protein binding; Molecular Function GO:0006355; regulation of transcription, DNA-dependent; Biological Process GO:0008270; zinc ion binding; Molecular Function GO:0043565; sequence-specific DNA binding; Molecular Function GO:0045449; regulation of tra…	hox3, Hox2a; homeobox3; K11657 remodeling and spacing factor 1
Pa6	8006400	Pm021311	1	IPR001563; Peptidase S10, serine carboxypeptidase	2	GO:0004185; serine-type carboxypeptidase activity; Molecular Function GO:0006508; proteolysis; Biological Process	SCPL19; SCPL19; serine-type carboxypeptidase/ sinapoyltransferase; K09756 serine carboxypeptidase-like 19 [EC:3.4.16.- 2.3.1.91]
Pa6	8006400	Pm021312	NA	NA	NA	NA	Os02g0831600; K11596 argonaute
Pa6	8896698	Pm021458	NA	NA	NA	NA	NA
Pa6	9541473	Pm021543	3	IPR003114; Phox-associated domain IPR013937; Sorting nexin, C-terminal IPR013996; PX-associated, sorting nexin 13	NA	NA	NA
Pa6	9959357	Pm021608	4	IPR001841; Zinc finger, RING-type IPR013083; Zinc finger, RING/FYVE/PHD-type IPR017907; Zinc finger, RING-type, conserved site IPR018957; Zinc finger, C3HC4 RING-type	2	GO:0005515; protein binding; Molecular Function GO:0008270; zinc ion binding; Molecular Function	hypothetical protein LOC100245178; K10666 E3 ubiquitin-protein ligase RNF5 [EC:6.3.2.19]
Pa6	10171933	Pm021636	1	IPR005013; Oligosaccharyl transferase complex, subunit Wbp1	3	GO:0004579; dolichyl-diphosphooligosaccharide-protein glycotransferase activity; Molecular Function GO:0005789; endoplasmic reticulum membrane; Cellular Component GO:0018279; protein N-linked glycosylation via asparagine; Biological Process	hypothetical protein LOC100250299; K12670 oligosaccharyltransferase complex subunit beta

## Sheet: G-Petal Color
PmID	PmPosition	gene	GENE_num	GENE	GO_num	GO	KEGG
Pa4	173847	Pm012867	3	IPR002937; Amine oxidase IPR004572; Protoporphyrinogen oxidase IPR016040; NAD(P)-binding domain	6	GO:0003824; catalytic activity; Molecular Function GO:0004729; oxygen-dependent protoporphyrinogen oxidase activity; Molecular Function GO:0005488; binding; Molecular Function GO:0006779; porphyrin biosynthetic process; Biological Process GO:0008152; metabolic process; Biological Process GO:0055114; oxidation-reduction process; Biological Process	protoporphyrinogen oxidase (EC:1.3.3.4); K00231 protoporphyrinogen oxidase [EC:1.3.3.4]
Pa4	173847	Pm012868	2	IPR003311; AUX/IAA protein IPR011525; Aux/IAA-ARF-dimerisation	3	GO:0005634; nucleus; Cellular Component GO:0045449; regulation of transcription; Biological Process GO:0046983; protein dimerization activity; Molecular Function	IAA12; IAA12 (AUXIN-INDUCED PROTEIN 12); transcription factor/ transcription repressor; K14484 auxin-responsive protein IAA
Pa4	538703	Pm012928	NA	NA	NA	NA	NA
Pa4	662175	Pm012945	NA	NA	NA	NA	NA
Pa4	662175	Pm012946	4	IPR000157; Toll-Interleukin receptor IPR000767; Disease resistance protein IPR001611; Leucine-rich repeat IPR002182; NB-ARC	8	GO:0004888; transmembrane receptor activity; Molecular Function GO:0005515; protein binding; Molecular Function GO:0005524; ATP binding; Molecular Function GO:0006915; apoptosis; Biological Process GO:0006952; defense response; Biological Process GO:0007165; signal transduction; Biological Process GO:0031224; intrinsic to membrane; Cellular Component GO:0045087; innate immune response; Biological…	Os07g0186500; K13457 disease resistance protein RPM1
Pa4	1267894	Pm013030	2	IPR000504; RNA recognition motif domain IPR012677; Nucleotide-binding, alpha-beta plait	2	GO:0000166; nucleotide binding; Molecular Function GO:0003676; nucleic acid binding; Molecular Function	hypothetical protein; K11294 nucleolin
Pa4	1567343	Pm013078	3	IPR011016; Zinc finger, RING-CH-type IPR013083; Zinc finger, RING/FYVE/PHD-type IPR018957; Zinc finger, C3HC4 RING-type	1	GO:0008270; zinc ion binding; Molecular Function	similar to GA17942-PA; K10656 E3 ubiquitin-protein ligase MARCH1/8 [EC:6.3.2.19]
Pa4	1567343	Pm013079	NA	NA	NA	NA	NA
Pa4	1915007	Pm013126	4	IPR001330; Prenyltransferase/squalene oxidase IPR002365; Terpene synthase, conserved site IPR008930; Terpenoid cylases/protein prenyltransferase alpha-alpha toroid IPR018333; Squalene cyclase	2	GO:0003824; catalytic activity; Molecular Function GO:0016866; intramolecular transferase activity; Molecular Function	Os02g0139700; K01853 cycloartenol synthase [EC:5.4.99.8]
Pa4	3148232	Pm013306	4	IPR000222; Protein phosphatase 2C, manganese/magnesium aspartate binding site IPR001932; Protein phosphatase 2C-like IPR014045; Protein phosphatase 2C, N-terminal IPR015655; Protein phosphatase 2C	4	GO:0003824; catalytic activity; Molecular Function GO:0004722; protein serine/threonine phosphatase activity; Molecular Function GO:0006470; protein dephosphorylation; Biological Process GO:0008287; protein serine/threonine phosphatase complex; Cellular Component	protein phosphatase 2c, putative (EC:3.1.3.16); K14497 protein phosphatase 2C [EC:3.1.3.16]
Pa4	3361665	Pm013341	5	IPR001944; Glycoside hydrolase, family 35 IPR008979; Galactose-binding domain-like IPR013781; Glycoside hydrolase, subgroup, catalytic core IPR017853; Glycoside hydrolase, superfamily IPR019801; Glycoside hydrolase, family 35, conserved site	4	GO:0003824; catalytic activity; Molecular Function GO:0004553; hydrolase activity, hydrolyzing O-glycosyl compounds; Molecular Function GO:0005975; carbohydrate metabolic process; Biological Process GO:0043169; cation binding; Molecular Function	hypothetical protein; K12309 beta-galactosidase [EC:3.2.1.23]
Pa4	3361665	Pm013342	NA	NA	NA	NA	NA
Pa4	3726051	Pm013381	9	IPR001806; Ras GTPase IPR002041; Ran GTPase IPR003577; Ras small GTPase, Ras type IPR003578; Small GTPase, Rho type IPR003579; Ras small GTPase, Rab type IPR005225; Small GTP-binding protein IPR006688; ADP-ribosylation factor IPR013753; Ras IPR020851; Small GTPase	8	GO:0003924; GTPase activity; Molecular Function GO:0005525; GTP binding; Molecular Function GO:0005622; intracellular; Cellular Component GO:0006886; intracellular protein transport; Biological Process GO:0006913; nucleocytoplasmic transport; Biological Process GO:0007165; signal transduction; Biological Process GO:0007264; small GTPase mediated signal transduction; Biological Process GO:0015031;…	Os01g0179700; K07874 Ras-related protein Rab-1A
Pa4	4160653	Pm013444	3	IPR000642; Peptidase M41 IPR003593; ATPase, AAA+ type, core IPR003959; ATPase, AAA-type, core	5	GO:0000166; nucleotide binding; Molecular Function GO:0004222; metalloendopeptidase activity; Molecular Function GO:0005524; ATP binding; Molecular Function GO:0006508; proteolysis; Biological Process GO:0017111; nucleoside-triphosphatase activity; Molecular Function	AFG3 ATPase family protein ; K08956 AFG3 family protein [EC:3.4.24.-]
Pa4	4177358	Pm013448	2	IPR002110; Ankyrin repeat IPR020683; Ankyrin repeat-containing domain	1	GO:0005515; protein binding; Molecular Function	RIPK4; receptor-interacting serine-threonine kinase 4; K08848 receptor-interacting serine/threonine-protein kinase 4 [EC:2.7.11.1]
Pa4	4177358	Pm013449	NA	NA	NA	NA	NA
Pa4	4393796	Pm013481	12	IPR001680; WD40 repeat IPR004087; K Homology IPR004088; K Homology, type 1 IPR009097; RNA ligase/cyclic nucleotide phosphodiesterase IPR011046; WD40 repeat-like-containing domain IPR015943; WD40/YVTN repeat-like-containing domain IPR017986; WD40-repeat-containing domain IPR018111; K Homology, type 1, subgroup IPR019510; Protein kinase A anchor protein, nuclear localisation signal domain IPR019781…	5	GO:0003723; RNA binding; Molecular Function GO:0003824; catalytic activity; Molecular Function GO:0005515; protein binding; Molecular Function GO:0005622; intracellular; Cellular Component GO:0016070; RNA metabolic process; Biological Process	GI23727 gene product from transcript GI23727-RA; K03362 F-box and WD-40 domain protein 1/11
Pa4	4770347	Pm013537	1	IPR001372; Dynein light chain, type 1/2	2	GO:0005875; microtubule associated complex; Cellular Component GO:0007017; microtubule-based process; Biological Process	dynein cytoplasmic light peptide-like; K10418 dynein light chain LC8-type
Pa4	4770347	Pm013538	1	IPR004864; Late embryogenesis abundant protein, group 2	NA	NA	NA
Pa4	4889518	Pm013558	NA	NA	NA	NA	NA
Pa4	4889518	Pm013559	1	IPR019185; Integral membrane protein SYS1-related	NA	NA	NA
Pa4	5014678	Pm013569	NA	NA	NA	NA	NA
Pa4	5014678	Pm013570	NA	NA	NA	NA	NA
Pa4	5088094	Pm013581	1	IPR010666; Zinc finger, GRF-type	1	GO:0008270; zinc ion binding; Molecular Function	NA
Pa4	5088094	Pm013582	NA	NA	NA	NA	NA
Pa4	5192932	Pm013591	6	IPR008940; Protein prenyltransferase IPR011990; Tetratricopeptide-like helical IPR013026; Tetratricopeptide repeat-containing IPR013105; Tetratricopeptide TPR2 IPR019734; Tetratricopeptide repeat IPR021183; Alpha-acetyltransferase 15, NatA	2	GO:0005488; binding; Molecular Function GO:0005515; protein binding; Molecular Function	NMDA receptor-regulated protein, putative; K00670 peptide alpha-N-acetyltransferase [EC:2.3.1.88]
Pa4	5192932	Pm013592	4	IPR001841; Zinc finger, RING-type IPR011016; Zinc finger, RING-CH-type IPR013083; Zinc finger, RING/FYVE/PHD-type IPR018957; Zinc finger, C3HC4 RING-type	2	GO:0005515; protein binding; Molecular Function GO:0008270; zinc ion binding; Molecular Function	cleavage and polyadenylation specificity factor, putative; K13148 integrator complex subunit 11 [EC:3.1.27.-]
Pa4	5257473	Pm013596	2	IPR003311; AUX/IAA protein IPR011525; Aux/IAA-ARF-dimerisation	3	GO:0005634; nucleus; Cellular Component GO:0045449; regulation of transcription; Biological Process GO:0046983; protein dimerization activity; Molecular Function	Auxin-induced protein AUX22, putative; K14484 auxin-responsive protein IAA
Pa4	5257473	Pm013597	2	IPR003311; AUX/IAA protein IPR011525; Aux/IAA-ARF-dimerisation	3	GO:0005634; nucleus; Cellular Component GO:0045449; regulation of transcription; Biological Process GO:0046983; protein dimerization activity; Molecular Function	AXR3; AXR3 (AUXIN RESISTANT 3); transcription factor; K14484 auxin-responsive protein IAA
Pa4	5642190	Pm013641	1	IPR000555; Mov34/MPN/PAD-1	1	GO:0005515; protein binding; Molecular Function	hypothetical protein LOC100253140; K11864 BRCA1/BRCA2-containing complex subunit 3
Pa4	5642190	Pm013642	1	IPR001876; Zinc finger, RanBP2-type	2	GO:0005622; intracellular; Cellular Component GO:0008270; zinc ion binding; Molecular Function	NA
Pa4	5720411	Pm013650	2	IPR008172; Adenylate cyclase IPR023577; CYTH-like phosphatase domain	2	GO:0004016; adenylate cyclase activity; Molecular Function GO:0006171; cAMP biosynthetic process; Biological Process	NA
Pa4	5720411	Pm013651	6	IPR001650; Helicase, C-terminal IPR001878; Zinc finger, CCHC-type IPR011545; DNA/RNA helicase, DEAD/DEAH box type, N-terminal IPR013084; Zinc finger, CCHC retroviral-type IPR014001; DEAD-like helicase IPR014014; RNA helicase, DEAD-box type, Q motif	5	GO:0003676; nucleic acid binding; Molecular Function GO:0004386; helicase activity; Molecular Function GO:0005524; ATP binding; Molecular Function GO:0008026; ATP-dependent helicase activity; Molecular Function GO:0008270; zinc ion binding; Molecular Function	hypothetical protein LOC100249809; K13116 ATP-dependent RNA helicase DDX41 [EC:3.6.4.13]
Pa4	5732541	Pm013653	3	IPR011992; EF-hand-like domain IPR018247; EF-Hand 1, calcium-binding site IPR018249; EF-HAND 2	1	GO:0005509; calcium ion binding; Molecular Function	hypothetical protein LOC100244675; K06268 protein phosphatase 3, regulatory subunit
Pa4	5732541	Pm013654	3	IPR002023; NADH:ubiquinone oxidoreductase, 24kDa subunit IPR012335; Thioredoxin fold IPR012336; Thioredoxin-like fold	3	GO:0016491; oxidoreductase activity; Molecular Function GO:0051287; NAD or NADH binding; Molecular Function GO:0055114; oxidation-reduction process; Biological Process	NADH-ubiquinone oxidoreductase 24 kDa subunit, putative; K03943 NADH dehydrogenase (ubiquinone) flavoprotein 2 [EC:1.6.5.3 1.6.99.3]
Pa4	5822228	Pm013664	8	IPR000719; Protein kinase, catalytic domain IPR001245; Serine-threonine/tyrosine-protein kinase IPR002290; Serine/threonine-protein kinase domain IPR006016; UspA IPR008271; Serine/threonine-protein kinase, active site IPR011009; Protein kinase-like domain IPR014729; Rossmann-like alpha/beta/alpha sandwich fold IPR020635; Tyrosine-protein kinase, catalytic domain	5	GO:0004672; protein kinase activity; Molecular Function GO:0004674; protein serine/threonine kinase activity; Molecular Function GO:0005524; ATP binding; Molecular Function GO:0006468; protein phosphorylation; Biological Process GO:0006950; response to stress; Biological Process	protein kinase family protein; K04733 interleukin-1 receptor-associated kinase 4 [EC:2.7.11.1]
Pa4	5822259	Pm013664	8	IPR000719; Protein kinase, catalytic domain IPR001245; Serine-threonine/tyrosine-protein kinase IPR002290; Serine/threonine-protein kinase domain IPR006016; UspA IPR008271; Serine/threonine-protein kinase, active site IPR011009; Protein kinase-like domain IPR014729; Rossmann-like alpha/beta/alpha sandwich fold IPR020635; Tyrosine-protein kinase, catalytic domain	5	GO:0004672; protein kinase activity; Molecular Function GO:0004674; protein serine/threonine kinase activity; Molecular Function GO:0005524; ATP binding; Molecular Function GO:0006468; protein phosphorylation; Biological Process GO:0006950; response to stress; Biological Process	protein kinase family protein; K04733 interleukin-1 receptor-associated kinase 4 [EC:2.7.11.1]
Pa4	5845282	Pm013666	2	IPR001739; Methyl-CpG DNA binding IPR016177; DNA-binding, integrase-type	2	GO:0003677; DNA binding; Molecular Function GO:0005634; nucleus; Cellular Component	NA
Pa4	6148430	Pm013713	2	IPR002182; NB-ARC IPR006553; Leucine-rich repeat, cysteine-containing subtype	2	GO:0005524; ATP binding; Molecular Function GO:0006915; apoptosis; Biological Process	hypothetical LOC577951; K10279 F-box and leucine-rich repeat protein 13
Pa4	6549712	Pm013771	1	IPR002999; Tudor domain	1	GO:0003676; nucleic acid binding; Molecular Function	binding; K11267 sister chromatid cohesion protein PDS5
Pa4	6549712	Pm013772	NA	NA	NA	NA	NA
Pa4	6982512	Pm013822	2	IPR003480; Transferase IPR023213; Chloramphenicol acetyltransferase-like domain	1	GO:0016747; transferase activity, transferring acyl groups other than amino-acyl groups; Molecular Function	HCQ7; hydroxycinnamoyl CoA shikimate/quinate hydroxycinnamoyltransferase (EC:2.3.1.133); K13065 shikimate O-hydroxycinnamoyltransferase [EC:2.3.1.133]
Pa4	6982512	Pm013823	2	IPR003480; Transferase IPR023213; Chloramphenicol acetyltransferase-like domain	1	GO:0016747; transferase activity, transferring acyl groups other than amino-acyl groups; Molecular Function	Anthranilate N-benzoyltransferase protein, putative (EC:2.3.1.144); K13065 shikimate O-hydroxycinnamoyltransferase [EC:2.3.1.133]
Pa4	7083151	Pm013829	2	IPR003480; Transferase IPR023213; Chloramphenicol acetyltransferase-like domain	1	GO:0016747; transferase activity, transferring acyl groups other than amino-acyl groups; Molecular Function	Anthranilate N-benzoyltransferase protein, putative (EC:2.3.1.144); K13065 shikimate O-hydroxycinnamoyltransferase [EC:2.3.1.133]
Pa4	7083151	Pm013830	2	IPR003480; Transferase IPR023213; Chloramphenicol acetyltransferase-like domain	1	GO:0016747; transferase activity, transferring acyl groups other than amino-acyl groups; Molecular Function	HCQ7; hydroxycinnamoyl CoA shikimate/quinate hydroxycinnamoyltransferase (EC:2.3.1.133); K13065 shikimate O-hydroxycinnamoyltransferase [EC:2.3.1.133]
Pa4	8462692	Pm014002	4	IPR002194; Chaperonin TCP-1, conserved site IPR002423; Chaperonin Cpn60/TCP-1 IPR012721; T-complex protein 1, theta subunit IPR017998; Chaperone, tailless complex polypeptide 1	4	GO:0005524; ATP binding; Molecular Function GO:0006457; protein folding; Biological Process GO:0044267; cellular protein metabolic process; Biological Process GO:0051082; unfolded protein binding; Molecular Function	hypothetical protein LOC100257135; K09500 T-complex protein 1 subunit theta
Pa4	8462692	Pm014003	NA	NA	NA	NA	NA
Pa4	8945470	Pm014051	NA	NA	NA	NA	NA
Pa4	8945470	Pm014052	NA	NA	NA	NA	NA
Pa4	8945960	Pm014051	NA	NA	NA	NA	NA
Pa4	8945960	Pm014052	NA	NA	NA	NA	NA
Pa4	9880564	Pm014139	NA	NA	NA	NA	NA
Pa4	9880564	Pm014140	NA	NA	NA	NA	NA
Pa4	10033599	Pm014153	3	IPR011009; Protein kinase-like domain IPR013212; Mad3/BUB1 homology region 1 IPR015661; Mitotic checkpoint serine/threonine protein kinase, Bub1	NA	NA	hypothetical protein LOC100194273; K02178 checkpoint serine/threonine-protein kinase [EC:2.7.11.1]
Pa4	10114676	Pm014163	1	IPR001848; Ribosomal protein S10	4	GO:0003735; structural constituent of ribosome; Molecular Function GO:0005622; intracellular; Cellular Component GO:0005840; ribosome; Cellular Component GO:0006412; translation; Biological Process	40S ribosomal protein S20, putative; K02969 small subunit ribosomal protein S20e
Pa4	10114676	Pm014164	NA	NA	NA	NA	NA
Pa4	10340404	Pm014188	NA	NA	NA	NA	hypothetical protein LOC100243760; K02116 ATP synthase protein I
Pa4	10340404	Pm014189	NA	NA	NA	NA	NA
Pa4	10399414	Pm014194	1	IPR006936; Domain of unknown function DUF640	NA	NA	NA
Pa4	10399414	Pm014195	NA	NA	NA	NA	NA
Pa4	10643172	Pm014215	3	IPR007087; Zinc finger, C2H2-type IPR013087; Zinc finger, C2H2-type/integrase, DNA-binding IPR015880; Zinc finger, C2H2-like	3	GO:0003676; nucleic acid binding; Molecular Function GO:0005622; intracellular; Cellular Component GO:0008270; zinc ion binding; Molecular Function	Zfp108; zinc finger protein 108; K09228 KRAB domain-containing zinc finger protein
Pa4	10643172	Pm014216	NA	NA	NA	NA	NA
Pa4	10705806	Pm014221	NA	NA	NA	NA	hypothetical protein; K14510 serine/threonine-protein kinase CTR1 [EC:2.7.11.1]
Pa4	10999857	Pm014257	NA	NA	NA	NA	NA
Pa4	10999857	Pm014258	NA	NA	NA	NA	NA
Pa4	11016749	Pm014259	NA	NA	NA	NA	NA
Pa4	11016749	Pm014260	NA	NA	NA	NA	NA
Pa4	11211483	Pm014285	NA	NA	NA	NA	NA
Pa4	11211483	Pm014286	NA	NA	NA	NA	NA
Pa4	11340647	Pm014291	6	IPR003107; RNA-processing protein, HAT helix IPR010491; PRP1 splicing factor, N-terminal IPR011990; Tetratricopeptide-like helical IPR013026; Tetratricopeptide repeat-containing IPR019734; Tetratricopeptide repeat IPR019955; Ubiquitin supergroup	6	GO:0000398; nuclear mRNA splicing, via spliceosome; Biological Process GO:0005488; binding; Molecular Function GO:0005515; protein binding; Molecular Function GO:0005622; intracellular; Cellular Component GO:0005634; nucleus; Cellular Component GO:0006396; RNA processing; Biological Process	pre-mRNA splicing factor, putative; K12855 pre-mRNA-processing factor 6
Pa4	11340647	Pm014292	5	IPR003663; Sugar/inositol transporter IPR005828; General substrate transporter IPR005829; Sugar transporter, conserved site IPR016196; Major facilitator superfamily, general substrate transporter IPR020846; Major facilitator superfamily	6	GO:0005215; transporter activity; Molecular Function GO:0006810; transport; Biological Process GO:0016020; membrane; Cellular Component GO:0016021; integral to membrane; Cellular Component GO:0022891; substrate-specific transmembrane transporter activity; Molecular Function GO:0055085; transmembrane transport; Biological Process	INT1; INT1 (INOSITOL TRANSPORTER 1); carbohydrate transmembrane transporter/ myo-inositol:hydrogen symporter/ sugar:hydrogen symporter; K08150 MFS transporter, SP family, solute carrier family 2 (myo-inositol transporter), member 13
Pa4	11445650	Pm014302	2	IPR000182; GCN5-related N-acetyltransferase (GNAT) domain IPR016181; Acyl-CoA N-acyltransferase	2	GO:0008080; N-acetyltransferase activity; Molecular Function GO:0008152; metabolic process; Biological Process	NA
Pa4	11445650	Pm014303	NA	NA	NA	NA	dead box ATP-dependent RNA helicase, putative; K12823 ATP-dependent RNA helicase DDX5/DBP2 [EC:3.6.4.13]
Pa4	11553278	Pm014314	NA	NA	NA	NA	NA
Pa4	11553278	Pm014315	NA	NA	NA	NA	NA
Pa4	11594674	Pm014315	NA	NA	NA	NA	NA
Pa4	11594674	Pm014316	NA	NA	NA	NA	NA
Pa4	11668859	Pm014321	NA	NA	NA	NA	NA
Pa4	11668859	Pm014322	1	IPR007117; Pollen allergen/expansin, C-terminal	NA	NA	NA
Pa4	12336391	Pm014384	1	IPR019557; Aminotransferase-like, plant mobile domain	NA	NA	NA
Pa4	12567666	Pm014411	NA	NA	NA	NA	NA
Pa4	12567666	Pm014412	NA	NA	NA	NA	NA
Pa4	12603630	Pm014418	1	IPR006501; Pectinesterase inhibitor	2	GO:0004857; enzyme inhibitor activity; Molecular Function GO:0030599; pectinesterase activity; Molecular Function	NA
Pa4	12603630	Pm014419	2	IPR011697; Peptidase C26 IPR017926; Glutamine amidotransferase type 1	2	GO:0006541; glutamine metabolic process; Biological Process GO:0016787; hydrolase activity; Molecular Function	peptidase family C26 protein; K01951 GMP synthase (glutamine-hydrolysing) [EC:6.3.5.2]
Pa4	13092332	Pm014472	NA	NA	NA	NA	NA
Pa4	13092332	Pm014473	NA	NA	NA	NA	NA
Pa4	13233476	Pm014490	8	IPR000910; High mobility group, HMG1/HMG2 IPR004162; Seven-in-absentia protein, sina IPR008974; TRAF-like IPR009071; High mobility group, superfamily IPR013010; Zinc finger, SIAH-type IPR013323; Seven In Absentia Homolog-type IPR018121; Seven-in-absentia protein, TRAF-like domain IPR019557; Aminotransferase-like, plant mobile domain	8	GO:0003677; DNA binding; Molecular Function GO:0004842; ubiquitin-protein ligase activity; Molecular Function GO:0005515; protein binding; Molecular Function GO:0005634; nucleus; Cellular Component GO:0006511; ubiquitin-dependent protein catabolic process; Biological Process GO:0007275; multicellular organismal development; Biological Process GO:0008270; zinc ion binding; Molecular Function GO:00…	NA
Pa4	13233476	Pm014491	5	IPR002376; Formyl transferase, N-terminal IPR005793; Formyl transferase, C-terminal IPR006121; Heavy metal transport/detoxification protein IPR011034; Formyl transferase, C-terminal-like IPR015518; Methionine tRNA Formyltransferase-like	5	GO:0003824; catalytic activity; Molecular Function GO:0009058; biosynthetic process; Biological Process GO:0016742; hydroxymethyl-, formyl- and related transferase activity; Molecular Function GO:0030001; metal ion transport; Biological Process GO:0046872; metal ion binding; Molecular Function	hypothetical protein LOC100265562; K00604 methionyl-tRNA formyltransferase [EC:2.1.2.9]
Pa4	13319003	Pm014497	1	IPR008998; Agglutinin	NA	NA	NA
Pa4	13319003	Pm014498	2	IPR006913; Glutathione-dependent formaldehyde-activating family, GFA IPR011057; Mss4-like	2	GO:0008152; metabolic process; Biological Process GO:0016846; carbon-sulfur lyase activity; Molecular Function	NA
Pa4	13334462	Pm014497	1	IPR008998; Agglutinin	NA	NA	NA
Pa4	13334462	Pm014498	2	IPR006913; Glutathione-dependent formaldehyde-activating family, GFA IPR011057; Mss4-like	2	GO:0008152; metabolic process; Biological Process GO:0016846; carbon-sulfur lyase activity; Molecular Function	NA
Pa4	13407732	Pm014506	NA	NA	NA	NA	NA
Pa4	13407732	Pm014507	5	IPR001085; Serine hydroxymethyltransferase IPR015421; Pyridoxal phosphate-dependent transferase, major region, subdomain 1 IPR015422; Pyridoxal phosphate-dependent transferase, major region, subdomain 2 IPR015424; Pyridoxal phosphate-dependent transferase, major domain IPR019798; Serine hydroxymethyltransferase, pyridoxal phosphate binding site	5	GO:0003824; catalytic activity; Molecular Function GO:0004372; glycine hydroxymethyltransferase activity; Molecular Function GO:0006544; glycine metabolic process; Biological Process GO:0006563; L-serine metabolic process; Biological Process GO:0030170; pyridoxal phosphate binding; Molecular Function	similar to plastid serine hydroxymethyltransferase; K00600 glycine hydroxymethyltransferase [EC:2.1.2.1]
Pa4	13812456	Pm014556	1	IPR010684; RNA polymerase II transcription factor SIII, subunit A	3	GO:0005634; nucleus; Cellular Component GO:0016021; integral to membrane; Cellular Component GO:0045449; regulation of transcription; Biological Process	NA
Pa4	14067460	Pm014593	7	IPR000719; Protein kinase, catalytic domain IPR002290; Serine/threonine-protein kinase domain IPR003527; MAP kinase, conserved site IPR011009; Protein kinase-like domain IPR017441; Protein kinase, ATP binding site IPR017442; Serine/threonine-protein kinase-like domain IPR020635; Tyrosine-protein kinase, catalytic domain	5	GO:0004672; protein kinase activity; Molecular Function GO:0004674; protein serine/threonine kinase activity; Molecular Function GO:0004707; MAP kinase activity; Molecular Function GO:0005524; ATP binding; Molecular Function GO:0006468; protein phosphorylation; Biological Process	ATMPK17; MAP kinase; K00924 [EC:2.7.1.-]
Pa4	14067460	Pm014594	3	IPR000504; RNA recognition motif domain IPR007201; RNA recognition motif 2 IPR012677; Nucleotide-binding, alpha-beta plait	2	GO:0000166; nucleotide binding; Molecular Function GO:0003676; nucleic acid binding; Molecular Function	hypothetical protein LOC100273020; K11294 nucleolin
Pa4	14228759	Pm014618	1	IPR003440; Glycosyl transferase, family 48	4	GO:0000148; 1,3-beta-D-glucan synthase complex; Cellular Component GO:0003843; 1,3-beta-D-glucan synthase activity; Molecular Function GO:0006075; 1,3-beta-D-glucan biosynthetic process; Biological Process GO:0016020; membrane; Cellular Component	hypothetical protein; K11000 callose synthase [EC:2.4.1.-]
Pa4	14354136	Pm014634	NA	NA	NA	NA	NA
Pa4	14354136	Pm014635	NA	NA	NA	NA	NA
Pa4	15174109	Pm014736	3	IPR000767; Disease resistance protein IPR002182; NB-ARC IPR003593; ATPase, AAA+ type, core	5	GO:0000166; nucleotide binding; Molecular Function GO:0005524; ATP binding; Molecular Function GO:0006915; apoptosis; Biological Process GO:0006952; defense response; Biological Process GO:0017111; nucleoside-triphosphatase activity; Molecular Function	hypothetical protein; K00901 diacylglycerol kinase [EC:2.7.1.107]
Pa4	15174109	Pm014737	NA	NA	NA	NA	NA
Pa4	15520616	Pm014806	8	IPR000719; Protein kinase, catalytic domain IPR001881; EGF-like calcium-binding IPR002290; Serine/threonine-protein kinase domain IPR008271; Serine/threonine-protein kinase, active site IPR011009; Protein kinase-like domain IPR017442; Serine/threonine-protein kinase-like domain IPR018097; EGF-like calcium-binding, conserved site IPR020635; Tyrosine-protein kinase, catalytic domain	5	GO:0004672; protein kinase activity; Molecular Function GO:0004674; protein serine/threonine kinase activity; Molecular Function GO:0005509; calcium ion binding; Molecular Function GO:0005524; ATP binding; Molecular Function GO:0006468; protein phosphorylation; Biological Process	BRASSINOSTEROID INSENSITIVE 1-associated receptor kinase 1 precursor, putative (EC:2.7.10.1 1.3.1.74); K13416 brassinosteroid insensitive 1-associated receptor kinase 1 [EC:2.7.10.1 2.7.11.1]
Pa4	16094370	Pm014882	1	IPR002213; UDP-glucuronosyl/UDP-glucosyltransferase	2	GO:0008152; metabolic process; Biological Process GO:0016758; transferase activity, transferring hexosyl groups; Molecular Function	hypothetical protein; K13030 cyanohydrin beta-glucosyltransferase [EC:2.4.1.85]
Pa4	16094370	Pm014883	7	IPR000719; Protein kinase, catalytic domain IPR002290; Serine/threonine-protein kinase domain IPR008271; Serine/threonine-protein kinase, active site IPR011009; Protein kinase-like domain IPR013212; Mad3/BUB1 homology region 1 IPR015661; Mitotic checkpoint serine/threonine protein kinase, Bub1 IPR017442; Serine/threonine-protein kinase-like domain	4	GO:0004672; protein kinase activity; Molecular Function GO:0004674; protein serine/threonine kinase activity; Molecular Function GO:0005524; ATP binding; Molecular Function GO:0006468; protein phosphorylation; Biological Process	hypothetical protein; K02178 checkpoint serine/threonine-protein kinase [EC:2.7.11.1]
Pa4	16792207	Pm015004	NA	NA	NA	NA	hypothetical protein; K03036 26S proteasome regulatory subunit N6
Pa4	16792207	Pm015005	4	IPR000743; Glycoside hydrolase, family 28 IPR006626; Parallel beta-helix repeat IPR011050; Pectin lyase fold/virulence factor IPR012334; Pectin lyase fold	2	GO:0004650; polygalacturonase activity; Molecular Function GO:0005975; carbohydrate metabolic process; Biological Process	exopolygalacturonase / galacturan 1,4-alpha-galacturonidase / pectinase; K01213 galacturan 1,4-alpha-galacturonidase [EC:3.2.1.67]
Pa4	16969066	Pm015028	2	IPR002885; Pentatricopeptide repeat IPR011990; Tetratricopeptide-like helical	1	GO:0005488; binding; Molecular Function	Cell division protein ftsH, putative (EC:3.6.4.3); K03798 cell division protease FtsH [EC:3.4.24.-]
Pa4	17201914	Pm015066	NA	NA	NA	NA	NA
Pa4	17201914	Pm015067	NA	NA	NA	NA	NA
Pa4	17203715	Pm015066	NA	NA	NA	NA	NA
Pa4	17203715	Pm015067	NA	NA	NA	NA	NA
Pa4	17533433	Pm015114	1	IPR002885; Pentatricopeptide repeat	NA	NA	Cell division protein ftsH, putative (EC:3.6.4.3); K03798 cell division protease FtsH [EC:3.4.24.-]
Pa4	17799326	Pm015163	NA	NA	NA	NA	hypothetical protein LOC100264570; K08653 membrane-bound transcription factor site-1 protease [EC:3.4.21.112]
Pa4	17799326	Pm015164	5	IPR000742; Epidermal growth factor-like, type 3 IPR000858; S-locus glycoprotein IPR001480; Bulb-type lectin domain IPR003609; Apple-like IPR013227; PAN-2 domain	3	GO:0005515; protein binding; Molecular Function GO:0005529; sugar binding; Molecular Function GO:0048544; recognition of pollen; Biological Process	NA

## Sheet: H-Timing
PmID	PmPosition	gene	GENE_num	GENE	GO_num	GO	KEGG
Pa1	12946878	Pm001729	NA	NA	NA	NA	NA
Pa1	12946878	Pm001730	1	IPR007462; Protein of unknown function DUF502	NA	NA	NA
Pa1	13375695	Pm001766	NA	NA	NA	NA	NA
Pa1	13375695	Pm001767	3	IPR002085; Alcohol dehydrogenase superfamily, zinc-containing IPR013149; Alcohol dehydrogenase, C-terminal IPR016040; NAD(P)-binding domain	6	GO:0003824; catalytic activity; Molecular Function GO:0005488; binding; Molecular Function GO:0008152; metabolic process; Biological Process GO:0008270; zinc ion binding; Molecular Function GO:0016491; oxidoreductase activity; Molecular Function GO:0055114; oxidation-reduction process; Biological Process	CADL10; cinnamyl alcohol dehydrogenase-like protein (EC:1.1.1.195); K00083 cinnamyl-alcohol dehydrogenase [EC:1.1.1.195]
Pa1	14986649	Pm001926	6	IPR001117; Multicopper oxidase, type 1 IPR002355; Multicopper oxidase, copper-binding site IPR008972; Cupredoxin IPR011706; Multicopper oxidase, type 2 IPR011707; Multicopper oxidase, type 3 IPR017760; L-ascorbate oxidase, plants	5	GO:0005507; copper ion binding; Molecular Function GO:0005576; extracellular region; Cellular Component GO:0008447; L-ascorbate oxidase activity; Molecular Function GO:0016491; oxidoreductase activity; Molecular Function GO:0055114; oxidation-reduction process; Biological Process	hypothetical protein LOC100251280; K00423 L-ascorbate oxidase [EC:1.10.3.3]
Pa1	15117766	Pm001937	NA	NA	NA	NA	NA
Pa1	15117766	Pm001938	2	IPR004147; ABC-1 IPR011009; Protein kinase-like domain	NA	NA	Os09g0250700; K08869 aarF domain-containing kinase
Pa1	15167441	Pm001945	3	IPR003957; Transcription factor, CBFA/NFYB, DNA topoisomerase IPR003958; Transcription factor CBF/NF-Y/archaeal histone IPR009072; Histone-fold	3	GO:0003677; DNA binding; Molecular Function GO:0005622; intracellular; Cellular Component GO:0043565; sequence-specific DNA binding; Molecular Function	hypothetical protein; K08065 nuclear transcription factor Y, beta
Pa1	15167441	Pm001946	2	IPR002885; Pentatricopeptide repeat IPR011990; Tetratricopeptide-like helical	1	GO:0005488; binding; Molecular Function	nucleobase:cation symporter; K03457 nucleobase:cation symporter-1, NCS1 family
Pa1	15246060	Pm001951	4	IPR001461; Peptidase A1 IPR001969; Peptidase aspartic, active site IPR009007; Peptidase aspartic, catalytic IPR021109; Peptidase aspartic	2	GO:0004190; aspartic-type endopeptidase activity; Molecular Function GO:0006508; proteolysis; Biological Process	aspartyl protease family protein; K00924 [EC:2.7.1.-]
Pa1	15277485	Pm001955	NA	NA	NA	NA	NA
Pa1	15277485	Pm001956	NA	NA	NA	NA	NA
Pa1	15378425	Pm001964	NA	NA	NA	NA	NA
Pa1	15378425	Pm001965	NA	NA	NA	NA	NA
Pa1	16054166	Pm002043	NA	NA	NA	NA	NA
Pa1	16054166	Pm002044	2	IPR001611; Leucine-rich repeat IPR011713; Leucine-rich repeat 3	1	GO:0005515; protein binding; Molecular Function	ATP binding / protein binding; K06685 maintenance of ploidy protein MOB1 (MPS1 binder 1)
Pa1	16424360	Pm002076	NA	NA	NA	NA	NA
Pa1	16424360	Pm002077	1	IPR002480; DAHP synthetase, class II	2	GO:0003849; 3-deoxy-7-phosphoheptulonate synthase activity; Molecular Function GO:0009073; aromatic amino acid family biosynthetic process; Biological Process	Phospho-2-dehydro-3-deoxyheptonate aldolase 1, chloroplast precursor, putative (EC:2.5.1.54); K01626 3-deoxy-7-phosphoheptulonate synthase [EC:2.5.1.54]
Pa1	16810777	Pm002121	NA	NA	NA	NA	NA
Pa1	16810777	Pm002122	NA	NA	NA	NA	NA
Pa1	17593365	Pm002192	2	IPR002110; Ankyrin repeat IPR020683; Ankyrin repeat-containing domain	1	GO:0005515; protein binding; Molecular Function	YALI0C01221p; K06694 26S proteasome non-ATPase regulatory subunit 10
Pa1	17593365	Pm002193	NA	NA	NA	NA	NA
Pa1	18635499	Pm002315	NA	NA	NA	NA	NA
Pa1	18635499	Pm002316	NA	NA	NA	NA	NA
Pa1	18844683	Pm002345	1	IPR001611; Leucine-rich repeat	1	GO:0005515; protein binding; Molecular Function	similar to somatic embryogenesis receptor-like kinase 3; K13416 brassinosteroid insensitive 1-associated receptor kinase 1 [EC:2.7.10.1 2.7.11.1]
Pa1	18844683	Pm002346	2	IPR001471; Pathogenesis-related transcriptional factor/ERF, DNA-binding IPR016177; DNA-binding, integrase-type	3	GO:0003677; DNA binding; Molecular Function GO:0003700; sequence-specific DNA binding transcription factor activity; Molecular Function GO:0006355; regulation of transcription, DNA-dependent; Biological Process	hypothetical protein LOC100252316; K09285 AP2-like factor, ANT lineage
Pa1	18979576	Pm002362	4	IPR003613; U box domain IPR011989; Armadillo-like helical IPR013083; Zinc finger, RING/FYVE/PHD-type IPR016024; Armadillo-type fold	4	GO:0000151; ubiquitin ligase complex; Cellular Component GO:0004842; ubiquitin-protein ligase activity; Molecular Function GO:0005488; binding; Molecular Function GO:0016567; protein ubiquitination; Biological Process	NA
Pa1	18979576	Pm002363	1	IPR016972; Uncharacterised conserved protein UCP031279	NA	NA	NA
Pa1	18986752	Pm002363	1	IPR016972; Uncharacterised conserved protein UCP031279	NA	NA	NA
Pa1	24521365	Pm003335	NA	NA	NA	NA	NA
Pa1	25333497	Pm003496	1	IPR008586; Protein of unknown function DUF868, plant	NA	NA	NA
Pa1	25333497	Pm003497	2	IPR004142; Ndr IPR015511; Pollen specific protein SF21	NA	NA	NA
Pa3	352509	Pm009665	7	IPR002500; Phosphoadenosine phosphosulphate reductase IPR004508; Thioredoxin-independent 5'-adenylylsulphate reductase IPR012335; Thioredoxin fold IPR012336; Thioredoxin-like fold IPR013766; Thioredoxin domain IPR014729; Rossmann-like alpha/beta/alpha sandwich fold IPR017936; Thioredoxin-like	6	GO:0003824; catalytic activity; Molecular Function GO:0008152; metabolic process; Biological Process GO:0016671; oxidoreductase activity, acting on a sulfur group of donors, disulfide as acceptor; Molecular Function GO:0019419; sulfate reduction; Biological Process GO:0045454; cell redox homeostasis; Biological Process GO:0055114; oxidation-reduction process; Biological Process	APR3; APR3 (APS REDUCTASE 3); adenylyl-sulfate reductase (EC:1.8.4.9); K05907 adenylyl-sulfate reductase (glutathione) [EC:1.8.4.9]
Pa3	352509	Pm009666	4	IPR000490; Glycoside hydrolase, family 17 IPR012946; X8 IPR013781; Glycoside hydrolase, subgroup, catalytic core IPR017853; Glycoside hydrolase, superfamily	4	GO:0003824; catalytic activity; Molecular Function GO:0004553; hydrolase activity, hydrolyzing O-glycosyl compounds; Molecular Function GO:0005975; carbohydrate metabolic process; Biological Process GO:0043169; cation binding; Molecular Function	hypothetical protein LOC100263145; K14489 arabidopsis histidine kinase 2/3/4 (cytokinin receptor) [EC:2.7.13.3]
Pa3	2751649	Pm010137	2	IPR000668; Peptidase C1A, papain C-terminal IPR013128; Peptidase C1A, papain	2	GO:0006508; proteolysis; Biological Process GO:0008234; cysteine-type peptidase activity; Molecular Function	cysteine proteinase, putative; K01376 [EC:3.4.22.-]
Pa3	2751649	Pm010138	4	IPR000169; Peptidase, cysteine peptidase active site IPR000668; Peptidase C1A, papain C-terminal IPR013128; Peptidase C1A, papain IPR013201; Proteinase inhibitor I29, cathepsin propeptide	3	GO:0004197; cysteine-type endopeptidase activity; Molecular Function GO:0006508; proteolysis; Biological Process GO:0008234; cysteine-type peptidase activity; Molecular Function	cysteine protease, putative (EC:1.3.1.74); K01365 cathepsin L [EC:3.4.22.15]

## Sheet: I-Shoot Length
PmID	PmPosition	gene	GENE_num	GENE	GO_num	GO	KEGG
Pa1	981066	Pm000143	1	IPR011598; Helix-loop-helix DNA-binding	3	GO:0005634; nucleus; Cellular Component GO:0030528; transcription regulator activity; Molecular Function GO:0045449; regulation of transcription; Biological Process	NA
Pa1	981066	Pm000144	2	IPR010658; Nodulin-like IPR016196; Major facilitator superfamily, general substrate transporter	NA	NA	NA
Pa1	1161574	Pm000175	4	IPR011990; Tetratricopeptide-like helical IPR013026; Tetratricopeptide repeat-containing IPR019183; N-acetyltransferase B complex, non-catalytic subunit IPR019734; Tetratricopeptide repeat	2	GO:0005488; binding; Molecular Function GO:0005515; protein binding; Molecular Function	NA
Pa1	1161574	Pm000176	6	IPR001117; Multicopper oxidase, type 1 IPR002355; Multicopper oxidase, copper-binding site IPR008972; Cupredoxin IPR011706; Multicopper oxidase, type 2 IPR011707; Multicopper oxidase, type 3 IPR017761; Laccase	6	GO:0005507; copper ion binding; Molecular Function GO:0008471; laccase activity; Molecular Function GO:0016491; oxidoreductase activity; Molecular Function GO:0046274; lignin catabolic process; Biological Process GO:0048046; apoplast; Cellular Component GO:0055114; oxidation-reduction process; Biological Process	l-ascorbate oxidase, putative (EC:1.10.3.3); K00423 L-ascorbate oxidase [EC:1.10.3.3]
Pa1	1824861	Pm000291	5	IPR001680; WD40 repeat IPR015943; WD40/YVTN repeat-like-containing domain IPR017986; WD40-repeat-containing domain IPR019781; WD40 repeat, subgroup IPR019782; WD40 repeat 2	1	GO:0005515; protein binding; Molecular Function	hypothetical protein ; K14548 U3 small nucleolar RNA-associated protein 4
Pa1	1824861	Pm000292	3	IPR000549; Photosystem I PsaG/PsaK protein IPR016370; Photosystem I PsaG/PsaK, reaction centre, plant IPR017494; Photosystem I PsaG, reaction centre, plant	3	GO:0009522; photosystem I; Cellular Component GO:0015979; photosynthesis; Biological Process GO:0016020; membrane; Cellular Component	Photosystem I reaction center subunit V, chloroplast precursor, putative; K08905 photosystem I subunit V
Pa1	1984610	Pm000314	3	IPR001932; Protein phosphatase 2C-like IPR014045; Protein phosphatase 2C, N-terminal IPR015655; Protein phosphatase 2C	1	GO:0003824; catalytic activity; Molecular Function	ATP binding / cAMP-dependent protein kinase regulator/ catalytic/ protein kinase/ protein serine/threonine phosphatase; K04345 protein kinase A [EC:2.7.11.11]
Pa1	3023751	Pm000480	3	IPR011016; Zinc finger, RING-CH-type IPR013083; Zinc finger, RING/FYVE/PHD-type IPR018957; Zinc finger, C3HC4 RING-type	1	GO:0008270; zinc ion binding; Molecular Function	hypothetical protein; K10661 E3 ubiquitin-protein ligase MARCH6 [EC:6.3.2.19]
Pa1	3053576	Pm000486	4	IPR001245; Serine-threonine/tyrosine-protein kinase IPR002290; Serine/threonine-protein kinase domain IPR011009; Protein kinase-like domain IPR020635; Tyrosine-protein kinase, catalytic domain	4	GO:0004672; protein kinase activity; Molecular Function GO:0004674; protein serine/threonine kinase activity; Molecular Function GO:0005524; ATP binding; Molecular Function GO:0006468; protein phosphorylation; Biological Process	hypothetical protein; K14500 BR-signaling kinase [EC:2.7.11.1]
Pa1	3083407	Pm000490	1	IPR021916; Protein of unknown function DUF3527	NA	NA	NA
Pa1	3083407	Pm000491	2	IPR002068; Heat shock protein Hsp20 IPR008978; HSP20-like chaperone	NA	NA	hypothetical protein; K13993 HSP20 family protein
Pa1	3532052	Pm000574	9	IPR000719; Protein kinase, catalytic domain IPR002290; Serine/threonine-protein kinase domain IPR008271; Serine/threonine-protein kinase, active site IPR009091; Regulator of chromosome condensation/beta-lactamase-inhibitor protein II IPR011009; Protein kinase-like domain IPR013320; Concanavalin A-like lectin/glucanase, subgroup IPR017441; Protein kinase, ATP binding site IPR017442; Serine/threoni…	4	GO:0004672; protein kinase activity; Molecular Function GO:0004674; protein serine/threonine kinase activity; Molecular Function GO:0005524; ATP binding; Molecular Function GO:0006468; protein phosphorylation; Biological Process	Os03g0637800; K00924 [EC:2.7.1.-]
Pa1	3532052	Pm000575	1	IPR001648; Ribosomal protein S18	4	GO:0003735; structural constituent of ribosome; Molecular Function GO:0005622; intracellular; Cellular Component GO:0005840; ribosome; Cellular Component GO:0006412; translation; Biological Process	MRPS18; Putative mitochondrial ribosomal protein S18; K02963 small subunit ribosomal protein S18
Pa1	4337047	Pm000715	1	IPR005202; Transcription factor GRAS	NA	NA	GAL1; GAI1-like E3 ubiquitin ligase protein; K14494 DELLA protein
Pa1	4337047	Pm000716	1	IPR005202; Transcription factor GRAS	NA	NA	GRAS86; DELLA domain GRAS family transcription factor, GA insensitive (GAI), GA1-3 1 (RGA1) repressor protein; K14494 DELLA protein
Pa1	4395757	Pm000723	1	IPR010742; Rab5-interacting	NA	NA	NA
Pa1	4461170	Pm000735	1	IPR002885; Pentatricopeptide repeat	NA	NA	nucleobase:cation symporter; K03457 nucleobase:cation symporter-1, NCS1 family
Pa1	4461170	Pm000736	9	IPR000719; Protein kinase, catalytic domain IPR002290; Serine/threonine-protein kinase domain IPR003527; MAP kinase, conserved site IPR008271; Serine/threonine-protein kinase, active site IPR008351; JNK MAP kinase IPR011009; Protein kinase-like domain IPR017441; Protein kinase, ATP binding site IPR017442; Serine/threonine-protein kinase-like domain IPR020635; Tyrosine-protein kinase, catalytic do…	5	GO:0004672; protein kinase activity; Molecular Function GO:0004674; protein serine/threonine kinase activity; Molecular Function GO:0004707; MAP kinase activity; Molecular Function GO:0005524; ATP binding; Molecular Function GO:0006468; protein phosphorylation; Biological Process	hypothetical protein LOC100251947; K04371 extracellular signal-regulated kinase 1/2 [EC:2.7.11.24]
Pa1	4476127	Pm000738	6	IPR002085; Alcohol dehydrogenase superfamily, zinc-containing IPR011032; GroES-like IPR013149; Alcohol dehydrogenase, C-terminal IPR013154; Alcohol dehydrogenase GroES-like IPR016040; NAD(P)-binding domain IPR020843; Polyketide synthase, enoylreductase	7	GO:0003824; catalytic activity; Molecular Function GO:0005488; binding; Molecular Function GO:0008152; metabolic process; Biological Process GO:0008270; zinc ion binding; Molecular Function GO:0016491; oxidoreductase activity; Molecular Function GO:0016747; transferase activity, transferring acyl groups other than amino-acyl groups; Molecular Function GO:0055114; oxidation-reduction process; Biol…	zinc binding dehydrogenase, putative (EC:1.3.1.38); K07512 mitochondrial trans-2-enoyl-CoA reductase [EC:1.3.1.38]
Pa1	4889533	Pm000799	4	IPR006044; 11-S seed storage protein, plant IPR006045; Cupin 1 IPR011051; Cupin, RmlC-type IPR014710; RmlC-like jelly roll fold	1	GO:0045735; nutrient reservoir activity; Molecular Function	NA
Pa1	5463963	Pm000904	NA	NA	NA	NA	NA
Pa1	5574265	Pm000916	1	IPR009395; GCN5-like 1	NA	NA	NA
Pa1	5574265	Pm000917	3	IPR002496; Phosphoribosyl-AMP cyclohydrolase IPR008179; Phosphoribosyl-ATP pyrophosphohydrolase IPR021130; Phosphoribosyl-ATP pyrophosphohydrolase-like	3	GO:0000105; histidine biosynthetic process; Biological Process GO:0004635; phosphoribosyl-AMP cyclohydrolase activity; Molecular Function GO:0004636; phosphoribosyl-ATP diphosphatase activity; Molecular Function	hypothetical protein LOC100258301; K11755 phosphoribosyl-ATP pyrophosphohydrolase / phosphoribosyl-AMP cyclohydrolase [EC:3.6.1.31 3.5.4.19]
Pa1	5939412	Pm000967	5	IPR002016; Haem peroxidase, plant/fungal/bacterial IPR002207; Plant ascorbate peroxidase IPR010255; Haem peroxidase IPR019793; Peroxidases heam-ligand binding site IPR019794; Peroxidase, active site	4	GO:0004601; peroxidase activity; Molecular Function GO:0006979; response to oxidative stress; Biological Process GO:0020037; heme binding; Molecular Function GO:0055114; oxidation-reduction process; Biological Process	hypothetical protein; K00434 L-ascorbate peroxidase [EC:1.11.1.11]
Pa1	5939412	Pm000968	1	IPR004147; ABC-1	NA	NA	Os04g0660200; K08869 aarF domain-containing kinase
Pa1	6063389	Pm000977	NA	NA	NA	NA	NA
Pa1	6063389	Pm000978	NA	NA	NA	NA	NA
Pa1	6139040	Pm000985	2	IPR001353; Proteasome, subunit alpha/beta IPR023333; Proteasome B-type subunit	3	GO:0004298; threonine-type endopeptidase activity; Molecular Function GO:0005839; proteasome core complex; Cellular Component GO:0051603; proteolysis involved in cellular protein catabolic process; Biological Process	hypothetical protein LOC100263853; K02736 20S proteasome subunit beta 7 [EC:3.4.25.1]
Pa1	6308538	Pm001006	1	IPR000782; FAS1 domain	NA	NA	NA
Pa1	6308538	Pm001007	1	IPR000782; FAS1 domain	NA	NA	NA
Pa1	8018784	Pm001211	1	IPR002100; Transcription factor, MADS-box	4	GO:0003700; sequence-specific DNA binding transcription factor activity; Molecular Function GO:0005634; nucleus; Cellular Component GO:0006355; regulation of transcription, DNA-dependent; Biological Process GO:0043565; sequence-specific DNA binding; Molecular Function	NA
Pa1	8018784	Pm001212	8	IPR001965; Zinc finger, PHD-type IPR004022; DDT domain IPR011011; Zinc finger, FYVE/PHD-type IPR013083; Zinc finger, RING/FYVE/PHD-type IPR018500; DDT domain, subgroup IPR018501; DDT domain superfamily IPR019786; Zinc finger, PHD-type, conserved site IPR019787; Zinc finger, PHD-finger	2	GO:0005515; protein binding; Molecular Function GO:0008270; zinc ion binding; Molecular Function	fetal alzheimer antigen, falz, putative (EC:2.3.1.48); K11728 nucleosome-remodeling factor subunit BPTF
Pa1	8283839	Pm001236	NA	NA	NA	NA	NA
Pa1	8283839	Pm001237	4	IPR000988; Ribosomal protein L24e IPR011017; TRASH IPR023441; Ribosomal protein L24e domain IPR023442; Ribosomal protein L24e, conserved site	3	GO:0003735; structural constituent of ribosome; Molecular Function GO:0005840; ribosome; Cellular Component GO:0006412; translation; Biological Process	hypothetical protein LOC100250021; K02896 large subunit ribosomal protein L24e
Pa1	9548333	Pm001366	NA	NA	NA	NA	NA
Pa1	9548333	Pm001367	2	IPR000058; Zinc finger, AN1-type IPR002653; Zinc finger, A20-type	2	GO:0003677; DNA binding; Molecular Function GO:0008270; zinc ion binding; Molecular Function	MGC52567; similar to testis-specific gene including a ubiquitin-likely domain; K12163 AN1-type zinc finger and ubiquitin domain-containing protein 1
Pa1	10005558	Pm001427	NA	NA	NA	NA	NA
Pa1	10005558	Pm001428	NA	NA	NA	NA	NA
Pa1	10117167	Pm001440	4	IPR002198; Short-chain dehydrogenase/reductase SDR IPR002347; Glucose/ribitol dehydrogenase IPR016040; NAD(P)-binding domain IPR020904; Short-chain dehydrogenase/reductase, conserved site	5	GO:0003824; catalytic activity; Molecular Function GO:0005488; binding; Molecular Function GO:0008152; metabolic process; Biological Process GO:0016491; oxidoreductase activity; Molecular Function GO:0055114; oxidation-reduction process; Biological Process	Os04g0179200; K13070 momilactone-A synthase [EC:1.1.1.295]
Pa1	10117167	Pm001441	4	IPR002198; Short-chain dehydrogenase/reductase SDR IPR002347; Glucose/ribitol dehydrogenase IPR016040; NAD(P)-binding domain IPR020904; Short-chain dehydrogenase/reductase, conserved site	5	GO:0003824; catalytic activity; Molecular Function GO:0005488; binding; Molecular Function GO:0008152; metabolic process; Biological Process GO:0016491; oxidoreductase activity; Molecular Function GO:0055114; oxidation-reduction process; Biological Process	Os04g0179200; K13070 momilactone-A synthase [EC:1.1.1.295]
Pa1	10150959	Pm001443	4	IPR001360; Glycoside hydrolase, family 1 IPR013781; Glycoside hydrolase, subgroup, catalytic core IPR017853; Glycoside hydrolase, superfamily IPR018120; Glycoside hydrolase, family 1, active site	4	GO:0003824; catalytic activity; Molecular Function GO:0004553; hydrolase activity, hydrolyzing O-glycosyl compounds; Molecular Function GO:0005975; carbohydrate metabolic process; Biological Process GO:0043169; cation binding; Molecular Function	beta-glucosidase, putative (EC:3.2.1.21); K01188 beta-glucosidase [EC:3.2.1.21]
Pa1	10150959	Pm001444	3	IPR001360; Glycoside hydrolase, family 1 IPR013781; Glycoside hydrolase, subgroup, catalytic core IPR017853; Glycoside hydrolase, superfamily	4	GO:0003824; catalytic activity; Molecular Function GO:0004553; hydrolase activity, hydrolyzing O-glycosyl compounds; Molecular Function GO:0005975; carbohydrate metabolic process; Biological Process GO:0043169; cation binding; Molecular Function	hypothetical protein; K01188 beta-glucosidase [EC:3.2.1.21]
Pa1	10267564	Pm001454	NA	NA	NA	NA	hypothetical protein; K11578 centromere/kinetochore protein ZW10
Pa1	10267564	Pm001455	1	IPR017498; Photosystem I PsaO	NA	NA	hypothetical protein; K14332 photosystem I subunit PsaO
Pa1	10279156	Pm001455	1	IPR017498; Photosystem I PsaO	NA	NA	hypothetical protein; K14332 photosystem I subunit PsaO
Pa1	10279156	Pm001456	3	IPR001327; Pyridine nucleotide-disulphide oxidoreductase, NAD-binding region IPR013027; FAD-dependent pyridine nucleotide-disulphide oxidoreductase IPR016040; NAD(P)-binding domain	6	GO:0003824; catalytic activity; Molecular Function GO:0005488; binding; Molecular Function GO:0008152; metabolic process; Biological Process GO:0016491; oxidoreductase activity; Molecular Function GO:0050660; flavin adenine dinucleotide binding; Molecular Function GO:0055114; oxidation-reduction process; Biological Process	AMID-like mitochondrial oxidoreductase (EC:1.-.-.-); K00540 [EC:1.-.-.-]
Pa1	10319172	Pm001460	3	IPR001344; Chlorophyll A-B binding protein, plant IPR022796; Chlorophyll A-B binding protein IPR023329; Chlorophyll a/b binding protein domain	2	GO:0009765; photosynthesis, light harvesting; Biological Process GO:0016020; membrane; Cellular Component	hypothetical protein LOC100250504; K08912 light-harvesting complex II chlorophyll a/b binding protein 1
Pa1	10319172	Pm001461	NA	NA	NA	NA	NA
Pa1	10329159	Pm001461	NA	NA	NA	NA	NA
Pa1	10329159	Pm001462	1	IPR020683; Ankyrin repeat-containing domain	NA	NA	NA
Pa1	10333752	Pm001461	NA	NA	NA	NA	NA
Pa1	10333752	Pm001462	1	IPR020683; Ankyrin repeat-containing domain	NA	NA	NA
Pa1	10380660	Pm001466	NA	NA	NA	NA	NA
Pa1	10380660	Pm001467	1	IPR003441; No apical meristem (NAM) protein	2	GO:0003677; DNA binding; Molecular Function GO:0045449; regulation of transcription; Biological Process	NA
Pa1	10381516	Pm001466	NA	NA	NA	NA	NA
Pa1	10381516	Pm001467	1	IPR003441; No apical meristem (NAM) protein	2	GO:0003677; DNA binding; Molecular Function GO:0045449; regulation of transcription; Biological Process	NA
Pa1	10572845	Pm001489	1	IPR021410; Protein of unknown function DUF3049	NA	NA	NA
Pa1	10572845	Pm001490	7	IPR005833; Haloacid dehydrogenase/epoxide hydrolase IPR005834; Haloacid dehalogenase-like hydrolase IPR006402; HAD-superfamily hydrolase, subfamily IA, variant 3 IPR015865; Riboflavin kinase domain, bacterial/eukaryotic IPR023214; HAD-like domain IPR023465; Riboflavin kinase domain IPR023468; Riboflavin kinase	5	GO:0003824; catalytic activity; Molecular Function GO:0008152; metabolic process; Biological Process GO:0008531; riboflavin kinase activity; Molecular Function GO:0009231; riboflavin biosynthetic process; Biological Process GO:0016787; hydrolase activity; Molecular Function	riboflavin kinase (EC:2.7.1.26); K00861 riboflavin kinase [EC:2.7.1.26]
Pa1	10584896	Pm001489	1	IPR021410; Protein of unknown function DUF3049	NA	NA	NA
Pa1	10584896	Pm001490	7	IPR005833; Haloacid dehydrogenase/epoxide hydrolase IPR005834; Haloacid dehalogenase-like hydrolase IPR006402; HAD-superfamily hydrolase, subfamily IA, variant 3 IPR015865; Riboflavin kinase domain, bacterial/eukaryotic IPR023214; HAD-like domain IPR023465; Riboflavin kinase domain IPR023468; Riboflavin kinase	5	GO:0003824; catalytic activity; Molecular Function GO:0008152; metabolic process; Biological Process GO:0008531; riboflavin kinase activity; Molecular Function GO:0009231; riboflavin biosynthetic process; Biological Process GO:0016787; hydrolase activity; Molecular Function	riboflavin kinase (EC:2.7.1.26); K00861 riboflavin kinase [EC:2.7.1.26]
Pa1	10614292	Pm001491	2	IPR007900; Transcription initiation factor TFIID component TAF4 IPR022003; RST domain of plant C-terminal	3	GO:0005669; transcription factor TFIID complex; Cellular Component GO:0006352; transcription initiation, DNA-dependent; Biological Process GO:0016986; transcription initiation factor activity; Molecular Function	NA
Pa1	10637898	Pm001493	1	IPR002885; Pentatricopeptide repeat	NA	NA	Cell division protein ftsH, putative (EC:3.6.4.3); K03798 cell division protease FtsH [EC:3.4.24.-]
Pa1	10637898	Pm001494	2	IPR002885; Pentatricopeptide repeat IPR011990; Tetratricopeptide-like helical	1	GO:0005488; binding; Molecular Function	Cell division protein ftsH, putative (EC:3.6.4.3); K03798 cell division protease FtsH [EC:3.4.24.-]
Pa1	10721483	Pm001502	1	IPR020966; Malate transporter, aliminium toerance	1	GO:0010044; response to aluminum ion; Biological Process	NA
Pa1	10852785	Pm001509	NA	NA	NA	NA	hypothetical protein; K00703 starch synthase [EC:2.4.1.21]
Pa1	10852785	Pm001510	NA	NA	NA	NA	NA
Pa1	11019702	Pm001524	NA	NA	NA	NA	NA
Pa1	11019702	Pm001525	NA	NA	NA	NA	NA
Pa1	11051068	Pm001528	4	IPR000719; Protein kinase, catalytic domain IPR001245; Serine-threonine/tyrosine-protein kinase IPR011009; Protein kinase-like domain IPR020635; Tyrosine-protein kinase, catalytic domain	3	GO:0004672; protein kinase activity; Molecular Function GO:0005524; ATP binding; Molecular Function GO:0006468; protein phosphorylation; Biological Process	Os02g0513000; K13430 serine/threonine-protein kinase PBS1 [EC:2.7.11.1]
Pa1	11147554	Pm001540	NA	NA	NA	NA	NA
Pa1	11147554	Pm001541	3	IPR001394; Peptidase C19, ubiquitin carboxyl-terminal hydrolase 2 IPR006615; Peptidase C19, ubiquitin-specific peptidase, DUSP domain IPR018200; Peptidase C19, ubiquitin carboxyl-terminal hydrolase 2, conserved site	2	GO:0004221; ubiquitin thiolesterase activity; Molecular Function GO:0006511; ubiquitin-dependent protein catabolic process; Biological Process	Ubiquitin carboxyl-terminal hydrolase, putative (EC:3.1.2.15); K11835 ubiquitin carboxyl-terminal hydrolase 4/11/15 [EC:3.1.2.15]
Pa1	11477446	Pm001574	5	IPR001394; Peptidase C19, ubiquitin carboxyl-terminal hydrolase 2 IPR002083; MATH IPR008974; TRAF-like IPR013322; TRAF-type IPR018200; Peptidase C19, ubiquitin carboxyl-terminal hydrolase 2, conserved site	3	GO:0004221; ubiquitin thiolesterase activity; Molecular Function GO:0005515; protein binding; Molecular Function GO:0006511; ubiquitin-dependent protein catabolic process; Biological Process	hypothetical protein LOC100266796; K11838 ubiquitin carboxyl-terminal hydrolase 7 [EC:3.1.2.15]
Pa1	11593973	Pm001586	NA	NA	NA	NA	NA
Pa1	11593973	Pm001587	3	IPR001764; Glycoside hydrolase, family 3, N-terminal IPR002772; Glycoside hydrolase, family 3, C-terminal IPR017853; Glycoside hydrolase, superfamily	2	GO:0004553; hydrolase activity, hydrolyzing O-glycosyl compounds; Molecular Function GO:0005975; carbohydrate metabolic process; Biological Process	hypothetical protein LOC100255282; K01188 beta-glucosidase [EC:3.2.1.21]
Pa1	11651404	Pm001595	3	IPR001764; Glycoside hydrolase, family 3, N-terminal IPR002772; Glycoside hydrolase, family 3, C-terminal IPR017853; Glycoside hydrolase, superfamily	2	GO:0004553; hydrolase activity, hydrolyzing O-glycosyl compounds; Molecular Function GO:0005975; carbohydrate metabolic process; Biological Process	hypothetical protein LOC100255282; K01188 beta-glucosidase [EC:3.2.1.21]
Pa1	11651404	Pm001596	NA	NA	NA	NA	NA
Pa1	11688798	Pm001597	2	IPR000209; Peptidase S8/S53, subtilisin/kexin/sedolisin IPR015500; Peptidase S8, subtilisin-related	2	GO:0004252; serine-type endopeptidase activity; Molecular Function GO:0006508; proteolysis; Biological Process	NA
Pa1	12065801	Pm001647	5	IPR001453; Molybdopterin binding IPR005110; MoeA, N-terminal and linker domain IPR005111; MoeA, C-terminal, domain IV IPR008284; Molybdenum cofactor biosynthesis, conserved site IPR020817; Molybdenum cofactor synthesis	2	GO:0006777; Mo-molybdopterin cofactor biosynthetic process; Biological Process GO:0032324; molybdopterin cofactor biosynthetic process; Biological Process	molybdopterin biosynthesis protein, putative; K03750 molybdopterin biosynthesis protein MoeA
Pa1	12290991	Pm001666	3	IPR006607; Protein of unknown function DM15 IPR006630; RNA-binding protein Lupus La IPR011991; Winged helix-turn-helix transcription repressor DNA-binding	NA	NA	ssb, wu:fb17f11, zgc:55588; Sjogren syndrome antigen B (autoantigen La); K11090 lupus La protein
Pa1	12352069	Pm001670	NA	NA	NA	NA	NA
Pa1	12352069	Pm001671	2	IPR004827; Basic-leucine zipper (bZIP) transcription factor IPR011616; bZIP transcription factor, bZIP-1	4	GO:0003700; sequence-specific DNA binding transcription factor activity; Molecular Function GO:0006355; regulation of transcription, DNA-dependent; Biological Process GO:0043565; sequence-specific DNA binding; Molecular Function GO:0046983; protein dimerization activity; Molecular Function	hypothetical protein; K14432 ABA responsive element binding factor
Pa1	12450740	Pm001680	6	IPR000719; Protein kinase, catalytic domain IPR001245; Serine-threonine/tyrosine-protein kinase IPR002290; Serine/threonine-protein kinase domain IPR008271; Serine/threonine-protein kinase, active site IPR011009; Protein kinase-like domain IPR020635; Tyrosine-protein kinase, catalytic domain	4	GO:0004672; protein kinase activity; Molecular Function GO:0004674; protein serine/threonine kinase activity; Molecular Function GO:0005524; ATP binding; Molecular Function GO:0006468; protein phosphorylation; Biological Process	hypothetical protein; K04733 interleukin-1 receptor-associated kinase 4 [EC:2.7.11.1]
Pa1	12450740	Pm001681	NA	NA	NA	NA	hypothetical protein LOC100251380; K10880 DNA-repair protein XRCC3
Pa1	12567685	Pm001692	NA	NA	NA	NA	NA
Pa1	12567685	Pm001693	2	IPR008985; Concanavalin A-like lectin/glucanase IPR014895; Alginate lyase 2	NA	NA	NA
Pa1	12585849	Pm001694	7	IPR002085; Alcohol dehydrogenase superfamily, zinc-containing IPR002328; Alcohol dehydrogenase, zinc-containing, conserved site IPR011032; GroES-like IPR013149; Alcohol dehydrogenase, C-terminal IPR013154; Alcohol dehydrogenase GroES-like IPR016040; NAD(P)-binding domain IPR020843; Polyketide synthase, enoylreductase	7	GO:0003824; catalytic activity; Molecular Function GO:0005488; binding; Molecular Function GO:0008152; metabolic process; Biological Process GO:0008270; zinc ion binding; Molecular Function GO:0016491; oxidoreductase activity; Molecular Function GO:0016747; transferase activity, transferring acyl groups other than amino-acyl groups; Molecular Function GO:0055114; oxidation-reduction process; Biol…	hypothetical protein LOC100245522; K00083 cinnamyl-alcohol dehydrogenase [EC:1.1.1.195]
Pa1	12585849	Pm001695	2	IPR002938; Monooxygenase, FAD-binding IPR003042; Aromatic-ring hydroxylase-like	4	GO:0004497; monooxygenase activity; Molecular Function GO:0008152; metabolic process; Biological Process GO:0016491; oxidoreductase activity; Molecular Function GO:0055114; oxidation-reduction process; Biological Process	AO090003000349; salicylate 1-monooxygenase SalA; K00480 salicylate hydroxylase [EC:1.14.13.1]
Pa1	13094593	Pm001741	1	IPR002775; DNA/RNA-binding protein Alba-like	1	GO:0003676; nucleic acid binding; Molecular Function	hypothetical protein; K14525 ribonucleases P/MRP protein subunit RPP25 [EC:3.1.26.5]
Pa1	13151308	Pm001746	3	IPR004123; mRNA splicing factor, thioredoxin-like U5 snRNP IPR012335; Thioredoxin fold IPR012336; Thioredoxin-like fold	2	GO:0005681; spliceosomal complex; Cellular Component GO:0007067; mitosis; Biological Process	pco104916; LOC100282486; K12859 U5 snRNP protein, DIM1 family
Pa1	13151308	Pm001747	NA	NA	NA	NA	NA
Pa1	13334690	Pm001763	1	IPR003746; Protein of unknown function DUF167	NA	NA	hypothetical protein LOC100259033; K09131 hypothetical protein
Pa1	13334690	Pm001764	8	IPR000719; Protein kinase, catalytic domain IPR000858; S-locus glycoprotein IPR001245; Serine-threonine/tyrosine-protein kinase IPR001480; Bulb-type lectin domain IPR002290; Serine/threonine-protein kinase domain IPR011009; Protein kinase-like domain IPR017441; Protein kinase, ATP binding site IPR020635; Tyrosine-protein kinase, catalytic domain	6	GO:0004672; protein kinase activity; Molecular Function GO:0004674; protein serine/threonine kinase activity; Molecular Function GO:0005524; ATP binding; Molecular Function GO:0005529; sugar binding; Molecular Function GO:0006468; protein phosphorylation; Biological Process GO:0048544; recognition of pollen; Biological Process	receptor serine-threonine protein kinase, putative (EC:2.7.10.2); K04733 interleukin-1 receptor-associated kinase 4 [EC:2.7.11.1]
Pa1	13542522	Pm001787	NA	NA	NA	NA	NA
Pa1	13542522	Pm001788	NA	NA	NA	NA	NA
Pa1	13578351	Pm001792	2	IPR000915; Ribosomal protein L6E IPR014722; Translation protein SH3-like, subgroup	4	GO:0003735; structural constituent of ribosome; Molecular Function GO:0005622; intracellular; Cellular Component GO:0005840; ribosome; Cellular Component GO:0006412; translation; Biological Process	60S ribosomal protein L6, putative; K02934 large subunit ribosomal protein L6e
Pa1	13578351	Pm001793	NA	NA	NA	NA	NA
Pa1	13590547	Pm001794	NA	NA	NA	NA	NA
Pa1	13590547	Pm001795	NA	NA	NA	NA	NA
Pa1	13960202	Pm001823	3	IPR000361; FeS cluster biogenesis IPR016092; FeS cluster insertion IPR017870; FeS cluster insertion, C-terminal, conserved site	3	GO:0005198; structural molecule activity; Molecular Function GO:0016226; iron-sulfur cluster assembly; Biological Process GO:0051536; iron-sulfur cluster binding; Molecular Function	hypothetical protein LOC100249101; K13628 iron-sulfur cluster assembly protein
Pa1	14012124	Pm001830	NA	NA	NA	NA	NA
Pa1	14012124	Pm001831	3	IPR005570; RNA polymerase, Rpb8 IPR012340; Nucleic acid-binding, OB-fold IPR016027; Nucleic acid-binding, OB-fold-like	1	GO:0006350; transcription; Biological Process	Os03g0845700; K03016 DNA-directed RNA polymerases I, II, and III subunit RPABC3
Pa1	14081062	Pm001836	3	IPR000891; Pyruvate carboxyltransferase IPR002034; Alpha-isopropylmalate/homocitrate synthase, conserved site IPR013785; Aldolase-type TIM barrel	4	GO:0003824; catalytic activity; Molecular Function GO:0008152; metabolic process; Biological Process GO:0019752; carboxylic acid metabolic process; Biological Process GO:0046912; transferase activity, transferring acyl groups, acyl groups converted into alkyl on transfer; Molecular Function	isopropylmalate synthase, putative (EC:2.3.3.13); K01649 2-isopropylmalate synthase [EC:2.3.3.13]
Pa1	14081062	Pm001837	NA	NA	NA	NA	NA
Pa1	14142311	Pm001843	NA	NA	NA	NA	NA
Pa1	14142311	Pm001844	NA	NA	NA	NA	NA
Pa1	14176659	Pm001848	1	IPR006121; Heavy metal transport/detoxification protein	2	GO:0030001; metal ion transport; Biological Process GO:0046872; metal ion binding; Molecular Function	NA
Pa1	14176659	Pm001849	NA	NA	NA	NA	NA
Pa1	14396558	Pm001867	NA	NA	NA	NA	Os04g0349500; K02995 small subunit ribosomal protein S8e
Pa1	14396558	Pm001868	1	IPR018731; Autophagy-related protein 13	NA	NA	DEHA2E09020p; K08331 autophagy-related protein 13
Pa1	14460013	Pm001871	NA	NA	NA	NA	NA
Pa1	14460013	Pm001872	1	IPR003653; Peptidase C48, SUMO/Sentrin/Ubl1	2	GO:0006508; proteolysis; Biological Process GO:0008234; cysteine-type peptidase activity; Molecular Function	NA
Pa1	14832969	Pm001911	NA	NA	NA	NA	NA
Pa1	14832969	Pm001912	1	IPR000620; Drug/metabolite transporter	1	GO:0016020; membrane; Cellular Component	NA
Pa1	14833265	Pm001911	NA	NA	NA	NA	NA
Pa1	14833265	Pm001912	1	IPR000620; Drug/metabolite transporter	1	GO:0016020; membrane; Cellular Component	NA
Pa1	14905204	Pm001916	2	IPR000767; Disease resistance protein IPR002182; NB-ARC	3	GO:0005524; ATP binding; Molecular Function GO:0006915; apoptosis; Biological Process GO:0006952; defense response; Biological Process	hypothetical protein LOC100258314; K01164 ribonuclease P/MRP protein subunit POP1 [EC:3.1.26.5]
Pa1	14986688	Pm001926	6	IPR001117; Multicopper oxidase, type 1 IPR002355; Multicopper oxidase, copper-binding site IPR008972; Cupredoxin IPR011706; Multicopper oxidase, type 2 IPR011707; Multicopper oxidase, type 3 IPR017760; L-ascorbate oxidase, plants	5	GO:0005507; copper ion binding; Molecular Function GO:0005576; extracellular region; Cellular Component GO:0008447; L-ascorbate oxidase activity; Molecular Function GO:0016491; oxidoreductase activity; Molecular Function GO:0055114; oxidation-reduction process; Biological Process	hypothetical protein LOC100251280; K00423 L-ascorbate oxidase [EC:1.10.3.3]
Pa1	15048954	Pm001932	NA	NA	NA	NA	NA
Pa1	15048954	Pm001933	1	IPR003653; Peptidase C48, SUMO/Sentrin/Ubl1	2	GO:0006508; proteolysis; Biological Process GO:0008234; cysteine-type peptidase activity; Molecular Function	NA
Pa1	15064468	Pm001934	NA	NA	NA	NA	hypothetical protein; K03036 26S proteasome regulatory subunit N6
Pa1	15064468	Pm001935	3	IPR001623; Heat shock protein DnaJ, N-terminal IPR003095; Heat shock protein DnaJ IPR018253; Heat shock protein DnaJ, conserved site	3	GO:0006457; protein folding; Biological Process GO:0031072; heat shock protein binding; Molecular Function GO:0051082; unfolded protein binding; Molecular Function	hypothetical protein ; K09510 DnaJ homolog subfamily B member 4
Pa1	15134278	Pm001938	2	IPR004147; ABC-1 IPR011009; Protein kinase-like domain	NA	NA	Os09g0250700; K08869 aarF domain-containing kinase
Pa1	15210911	Pm001948	3	IPR000595; Cyclic nucleotide-binding domain IPR014710; RmlC-like jelly roll fold IPR018490; Cyclic nucleotide-binding-like	NA	NA	ATCNGC3 (CYCLIC NUCLEOTIDE GATED CHANNEL 3); calmodulin binding / cyclic nucleotide binding / ion channel; K05391 cyclic nucleotide gated channel, other eukaryote
Pa1	15210911	Pm001949	3	IPR000595; Cyclic nucleotide-binding domain IPR014710; RmlC-like jelly roll fold IPR018490; Cyclic nucleotide-binding-like	NA	NA	CNGC1; CNGC1 (CYCLIC NUCLEOTIDE GATED CHANNEL 1); calmodulin binding / cation channel/ cyclic nucleotide binding / intracellular cyclic nucleotide activated cation channel/ inward rectifier potassium channel; K05391 cyclic nucleotide gated channel, other eukaryote
Pa1	15280114	Pm001955	NA	NA	NA	NA	NA
Pa1	15280114	Pm001956	NA	NA	NA	NA	NA
Pa1	15348400	Pm001959	2	IPR001024; Lipoxygenase, LH2 IPR008976; Lipase/lipooxygenase, PLAT/LH2	1	GO:0005515; protein binding; Molecular Function	NA
Pa1	15348400	Pm001960	5	IPR001440; Tetratricopeptide TPR-1 IPR011990; Tetratricopeptide-like helical IPR013026; Tetratricopeptide repeat-containing IPR013105; Tetratricopeptide TPR2 IPR019734; Tetratricopeptide repeat	2	GO:0005488; binding; Molecular Function GO:0005515; protein binding; Molecular Function	AGAP008985-PA; K09527 DnaJ homolog subfamily C member 7
Pa1	15744912	Pm002007	5	IPR000048; IQ motif, EF-hand binding site IPR002909; Cell surface receptor IPT/TIG IPR005559; CG-1 IPR013783; Immunoglobulin-like fold IPR014756; Immunoglobulin E-set	5	GO:0005515; protein binding; Molecular Function GO:0005516; calmodulin binding; Molecular Function GO:0005634; nucleus; Cellular Component GO:0030528; transcription regulator activity; Molecular Function GO:0045449; regulation of transcription; Biological Process	NA
Pa1	15913530	Pm002029	NA	NA	NA	NA	NA
Pa1	15913530	Pm002030	NA	NA	NA	NA	NA
Pa1	16032064	Pm002042	NA	NA	NA	NA	NA
Pa1	16032064	Pm002043	NA	NA	NA	NA	NA
Pa1	16044018	Pm002043	NA	NA	NA	NA	NA
Pa1	16044018	Pm002044	2	IPR001611; Leucine-rich repeat IPR011713; Leucine-rich repeat 3	1	GO:0005515; protein binding; Molecular Function	ATP binding / protein binding; K06685 maintenance of ploidy protein MOB1 (MPS1 binder 1)
Pa1	16778275	Pm002119	2	IPR005814; Aminotransferase class-III IPR015421; Pyridoxal phosphate-dependent transferase, major region, subdomain 1	3	GO:0003824; catalytic activity; Molecular Function GO:0008483; transaminase activity; Molecular Function GO:0030170; pyridoxal phosphate binding; Molecular Function	hypothetical protein; K00833 adenosylmethionine-8-amino-7-oxononanoate aminotransferase [EC:2.6.1.62]
Pa1	16778275	Pm002120	3	IPR001841; Zinc finger, RING-type IPR013083; Zinc finger, RING/FYVE/PHD-type IPR018957; Zinc finger, C3HC4 RING-type	2	GO:0005515; protein binding; Molecular Function GO:0008270; zinc ion binding; Molecular Function	zgc:158807; K11982 E3 ubiquitin-protein ligase RNF115/126 [EC:6.3.2.19]
Pa1	16907794	Pm002129	1	IPR002528; Multi antimicrobial extrusion protein	5	GO:0006855; drug transmembrane transport; Biological Process GO:0015238; drug transmembrane transporter activity; Molecular Function GO:0015297; antiporter activity; Molecular Function GO:0016020; membrane; Cellular Component GO:0055085; transmembrane transport; Biological Process	NA
Pa1	16907794	Pm002130	NA	NA	NA	NA	NA
Pa1	16921488	Pm002130	NA	NA	NA	NA	NA
Pa1	16921488	Pm002131	NA	NA	NA	NA	NA
Pa1	17164402	Pm002165	2	IPR001752; Kinesin, motor domain IPR019821; Kinesin, motor region, conserved site	3	GO:0003777; microtubule motor activity; Molecular Function GO:0005524; ATP binding; Molecular Function GO:0007018; microtubule-based movement; Biological Process	ATP binding protein, putative; K10406 kinesin family member C2/C3
Pa1	17372936	Pm002178	1	IPR019557; Aminotransferase-like, plant mobile domain	NA	NA	NA
Pa1	17372936	Pm002179	3	IPR000767; Disease resistance protein IPR001611; Leucine-rich repeat IPR002182; NB-ARC	4	GO:0005515; protein binding; Molecular Function GO:0005524; ATP binding; Molecular Function GO:0006915; apoptosis; Biological Process GO:0006952; defense response; Biological Process	Disease resistance protein RPM1, putative (EC:3.1.3.16); K13457 disease resistance protein RPM1
Pa1	17801720	Pm002222	NA	NA	NA	NA	hypothetical protein LOC100255395; K12349 neutral ceramidase [EC:3.5.1.23]
Pa1	17801720	Pm002223	7	IPR000719; Protein kinase, catalytic domain IPR001245; Serine-threonine/tyrosine-protein kinase IPR002290; Serine/threonine-protein kinase domain IPR003613; U box domain IPR011009; Protein kinase-like domain IPR013083; Zinc finger, RING/FYVE/PHD-type IPR020635; Tyrosine-protein kinase, catalytic domain	7	GO:0000151; ubiquitin ligase complex; Cellular Component GO:0004672; protein kinase activity; Molecular Function GO:0004674; protein serine/threonine kinase activity; Molecular Function GO:0004842; ubiquitin-protein ligase activity; Molecular Function GO:0005524; ATP binding; Molecular Function GO:0006468; protein phosphorylation; Biological Process GO:0016567; protein ubiquitination; Biological …	protein kinase family protein; K04733 interleukin-1 receptor-associated kinase 4 [EC:2.7.11.1]
Pa1	18468830	Pm002294	NA	NA	NA	NA	NA
Pa1	18468830	Pm002295	1	IPR013256; Chromatin SPT2	NA	NA	NA
Pa1	18699909	Pm002327	5	IPR001356; Homeobox IPR003106; Leucine zipper, homeobox-associated IPR009057; Homeodomain-like IPR012287; Homeodomain-related IPR017970; Homeobox, conserved site	8	GO:0003677; DNA binding; Molecular Function GO:0003700; sequence-specific DNA binding transcription factor activity; Molecular Function GO:0005515; protein binding; Molecular Function GO:0005634; nucleus; Cellular Component GO:0006355; regulation of transcription, DNA-dependent; Biological Process GO:0030528; transcription regulator activity; Molecular Function GO:0043565; sequence-specific DNA b…	HAT22; HAT22; transcription factor; K09338 homeobox-leucine zipper protein
Pa1	18699909	Pm002328	NA	NA	NA	NA	NA
Pa1	18758750	Pm002333	NA	NA	NA	NA	NA
Pa1	18758750	Pm002334	2	IPR002885; Pentatricopeptide repeat IPR011990; Tetratricopeptide-like helical	1	GO:0005488; binding; Molecular Function	Cell division protein ftsH, putative (EC:3.6.4.3); K03798 cell division protease FtsH [EC:3.4.24.-]
Pa1	19067228	Pm002376	5	IPR003579; Ras small GTPase, Rab type IPR005225; Small GTP-binding protein IPR006687; Small GTPase SAR1-type IPR006688; ADP-ribosylation factor IPR006689; ARF/SAR superfamily	5	GO:0005525; GTP binding; Molecular Function GO:0005622; intracellular; Cellular Component GO:0006886; intracellular protein transport; Biological Process GO:0007264; small GTPase mediated signal transduction; Biological Process GO:0015031; protein transport; Biological Process	ATARLA1C (ADP-ribosylation factor-like A1C); GTP binding; K07977 Arf/Sar family, other
Pa1	19067228	Pm002377	NA	NA	NA	NA	NA
Pa1	19345480	Pm002410	4	IPR000210; BTB/POZ-like IPR004249; NPH3 IPR011333; BTB/POZ fold IPR013069; BTB/POZ	3	GO:0004871; signal transducer activity; Molecular Function GO:0005515; protein binding; Molecular Function GO:0009416; response to light stimulus; Biological Process	NA
Pa1	19345480	Pm002411	NA	NA	NA	NA	NA
Pa1	19860026	Pm002488	2	IPR006514; Conserved hypothetical protein CHP01627 IPR021148; Protein of unknown function DUF579	NA	NA	NA
Pa1	19860026	Pm002489	6	IPR000719; Protein kinase, catalytic domain IPR001611; Leucine-rich repeat IPR002290; Serine/threonine-protein kinase domain IPR011009; Protein kinase-like domain IPR017442; Serine/threonine-protein kinase-like domain IPR020635; Tyrosine-protein kinase, catalytic domain	5	GO:0004672; protein kinase activity; Molecular Function GO:0004674; protein serine/threonine kinase activity; Molecular Function GO:0005515; protein binding; Molecular Function GO:0005524; ATP binding; Molecular Function GO:0006468; protein phosphorylation; Biological Process	serine/threonine-protein kinase bri1, putative (EC:2.7.11.25 3.1.3.16); K13415 protein brassinosteroid insensitive 1 [EC:2.7.10.1 2.7.11.1]
Pa1	20012732	Pm002513	2	IPR000326; Phosphatidic acid phosphatase type 2/haloperoxidase IPR016118; Phosphatidic acid phosphatase/chloroperoxidase, N-terminal	2	GO:0003824; catalytic activity; Molecular Function GO:0016020; membrane; Cellular Component	hypothetical protein; K07252 dolichyldiphosphatase [EC:3.6.1.43]
Pa1	20012732	Pm002514	3	IPR000225; Armadillo IPR011989; Armadillo-like helical IPR016024; Armadillo-type fold	2	GO:0005488; binding; Molecular Function GO:0005515; protein binding; Molecular Function	NA
Pa1	20050153	Pm002521	3	IPR000823; Plant peroxidase IPR002016; Haem peroxidase, plant/fungal/bacterial IPR010255; Haem peroxidase	4	GO:0004601; peroxidase activity; Molecular Function GO:0006979; response to oxidative stress; Biological Process GO:0020037; heme binding; Molecular Function GO:0055114; oxidation-reduction process; Biological Process	hypothetical protein LOC100256842; K00430 peroxidase [EC:1.11.1.7]
Pa1	20050153	Pm002522	1	IPR012881; Protein of unknown function DUF1685	NA	NA	NA
Pa1	20072263	Pm002525	NA	NA	NA	NA	NA
Pa1	20072263	Pm002526	1	IPR002123; Phospholipid/glycerol acyltransferase	2	GO:0008152; metabolic process; Biological Process GO:0008415; acyltransferase activity; Molecular Function	glycerol-3-phosphate acyltransferase (EC:2.3.1.51); K13508 glycerol-3-phosphate acyltransferase [EC:2.3.1.15]
Pa1	20322698	Pm002576	6	IPR001005; SANT domain, DNA binding IPR009057; Homeodomain-like IPR012287; Homeodomain-related IPR014778; Myb, DNA-binding IPR015495; Myb transcription factor IPR017930; Transcription regulator HTH, Myb-type, DNA-binding	3	GO:0003677; DNA binding; Molecular Function GO:0005515; protein binding; Molecular Function GO:0045449; regulation of transcription; Biological Process	hypothetical protein LOC100256309; K09422 myb proto-oncogene protein, plant
Pa1	21114345	Pm002714	3	IPR000595; Cyclic nucleotide-binding domain IPR014710; RmlC-like jelly roll fold IPR018490; Cyclic nucleotide-binding-like	NA	NA	CNGC1; CNGC1 (CYCLIC NUCLEOTIDE GATED CHANNEL 1); calmodulin binding / cation channel/ cyclic nucleotide binding / intracellular cyclic nucleotide activated cation channel/ inward rectifier potassium channel; K05391 cyclic nucleotide gated channel, other eukaryote
Pa1	21458205	Pm002778	11	IPR000719; Protein kinase, catalytic domain IPR001611; Leucine-rich repeat IPR002290; Serine/threonine-protein kinase domain IPR003591; Leucine-rich repeat, typical subtype IPR008271; Serine/threonine-protein kinase, active site IPR011009; Protein kinase-like domain IPR013210; Leucine-rich repeat-containing N-terminal, type 2 IPR013320; Concanavalin A-like lectin/glucanase, subgroup IPR017441; Pr…	5	GO:0004672; protein kinase activity; Molecular Function GO:0004674; protein serine/threonine kinase activity; Molecular Function GO:0005515; protein binding; Molecular Function GO:0005524; ATP binding; Molecular Function GO:0006468; protein phosphorylation; Biological Process	EFR; EFR (EF-TU RECEPTOR); ATP binding / kinase/ protein serine/threonine kinase; K13428 LRR receptor-like serine/threonine-protein kinase EFR [EC:2.7.11.1]
Pa1	21458205	Pm002779	NA	NA	NA	NA	NA
Pa1	21771426	Pm002841	2	IPR002136; Ribosomal protein L4/L1e IPR023574; Ribosomal protein L4 domain	3	GO:0003735; structural constituent of ribosome; Molecular Function GO:0005840; ribosome; Cellular Component GO:0006412; translation; Biological Process	hypothetical protein LOC100255110; K02930 large subunit ribosomal protein L4e
Pa1	21779470	Pm002841	2	IPR002136; Ribosomal protein L4/L1e IPR023574; Ribosomal protein L4 domain	3	GO:0003735; structural constituent of ribosome; Molecular Function GO:0005840; ribosome; Cellular Component GO:0006412; translation; Biological Process	hypothetical protein LOC100255110; K02930 large subunit ribosomal protein L4e
Pa1	21779470	Pm002842	1	IPR004253; Domain of unknown function DUF231, plant	NA	NA	NA
Pa1	21889521	Pm002869	3	IPR001611; Leucine-rich repeat IPR003591; Leucine-rich repeat, typical subtype IPR013210; Leucine-rich repeat-containing N-terminal, type 2	1	GO:0005515; protein binding; Molecular Function	hypothetical protein; K13420 LRR receptor-like serine/threonine-protein kinase FLS2 [EC:2.7.11.1]
Pa1	22164373	Pm002913	12	IPR000719; Protein kinase, catalytic domain IPR002048; Calcium-binding EF-hand IPR002290; Serine/threonine-protein kinase domain IPR008271; Serine/threonine-protein kinase, active site IPR011009; Protein kinase-like domain IPR011992; EF-hand-like domain IPR017441; Protein kinase, ATP binding site IPR017442; Serine/threonine-protein kinase-like domain IPR018247; EF-Hand 1, calcium-binding site IPR…	5	GO:0004672; protein kinase activity; Molecular Function GO:0004674; protein serine/threonine kinase activity; Molecular Function GO:0005509; calcium ion binding; Molecular Function GO:0005524; ATP binding; Molecular Function GO:0006468; protein phosphorylation; Biological Process	calcium-dependent protein kinase, putative (EC:2.7.11.17); K13412 calcium-dependent protein kinase [EC:2.7.11.1]

## Sheet: J-Shoot Diameter
PmID	PmPosition	gene	GENE_num	GENE	GO_num	GO	KEGG
Pa2	18252915	Pm006659	6	IPR000719; Protein kinase, catalytic domain IPR001245; Serine-threonine/tyrosine-protein kinase IPR002290; Serine/threonine-protein kinase domain IPR008271; Serine/threonine-protein kinase, active site IPR011009; Protein kinase-like domain IPR020635; Tyrosine-protein kinase, catalytic domain	4	GO:0004672; protein kinase activity; Molecular Function GO:0004674; protein serine/threonine kinase activity; Molecular Function GO:0005524; ATP binding; Molecular Function GO:0006468; protein phosphorylation; Biological Process	hypothetical protein LOC100240856; K14510 serine/threonine-protein kinase CTR1 [EC:2.7.11.1]
Pa2	18252915	Pm006660	NA	NA	NA	NA	NA
Pa2	18583996	Pm006710	4	IPR000268; RNA polymerase, subunit N/RPB10 IPR012287; Homeodomain-related IPR020789; RNA polymerases, subunit N, zinc binding site IPR023580; RNA polymerase subunit RPB10	5	GO:0003677; DNA binding; Molecular Function GO:0003899; DNA-directed RNA polymerase activity; Molecular Function GO:0006351; transcription, DNA-dependent; Biological Process GO:0008270; zinc ion binding; Molecular Function GO:0045449; regulation of transcription; Biological Process	hypothetical protein LOC100267114; K03007 DNA-directed RNA polymerases I, II, and III subunit RPABC5
Pa2	18583996	Pm006711	2	IPR001841; Zinc finger, RING-type IPR017066; S-ribonuclease binding protein, SBP1, pollen	2	GO:0005515; protein binding; Molecular Function GO:0008270; zinc ion binding; Molecular Function	BIRC3, AIP1, API2, CIAP2, HAIP1, HIAP1, MALT2, MIHC, RNF49, c-IAP2; baculoviral IAP repeat-containing 3; K04725 baculoviral IAP repeat-containing 2/3/4
Pa2	19800329	Pm006883	NA	NA	NA	NA	NA
Pa2	19800329	Pm006884	1	IPR003511; DNA-binding HORMA	1	GO:0007067; mitosis; Biological Process	plant mitotic spindle assembly checkpoint protein mad2, putative; K02537 mitotic spindle assembly checkpoint protein MAD2
Pa2	20290119	Pm006942	5	IPR000225; Armadillo IPR003613; U box domain IPR011989; Armadillo-like helical IPR013083; Zinc finger, RING/FYVE/PHD-type IPR016024; Armadillo-type fold	5	GO:0000151; ubiquitin ligase complex; Cellular Component GO:0004842; ubiquitin-protein ligase activity; Molecular Function GO:0005488; binding; Molecular Function GO:0005515; protein binding; Molecular Function GO:0016567; protein ubiquitination; Biological Process	hypothetical protein; K08332 vacuolar protein 8
Pa2	20290119	Pm006943	NA	NA	NA	NA	NA
Pa2	20617955	Pm006987	NA	NA	NA	NA	hypothetical protein; K14308 nuclear pore complex protein Nup54
Pa2	20617955	Pm006988	4	IPR001810; F-box domain, cyclin-like IPR006652; Kelch repeat type 1 IPR015916; Galactose oxidase, beta-propeller IPR022364; F-box domain, Skp2-like	1	GO:0005515; protein binding; Molecular Function	hypothetical protein; K10455 kelch-like protein 18
Pa2	20714216	Pm006997	2	IPR000572; Oxidoreductase, molybdopterin-binding domain IPR008335; Eukaryotic molybdopterin oxidoreductase	4	GO:0009055; electron carrier activity; Molecular Function GO:0016491; oxidoreductase activity; Molecular Function GO:0046872; metal ion binding; Molecular Function GO:0055114; oxidation-reduction process; Biological Process	sulfite reductase, putative (EC:1.8.3.1); K00387 sulfite oxidase [EC:1.8.3.1]
Pa2	20714216	Pm006998	1	IPR002935; O-methyltransferase, family 3	1	GO:0008171; O-methyltransferase activity; Molecular Function	hypothetical protein LOC100250567; K00588 caffeoyl-CoA O-methyltransferase [EC:2.1.1.104]
Pa2	21006161	Pm007042	1	IPR003657; DNA-binding WRKY	3	GO:0003700; sequence-specific DNA binding transcription factor activity; Molecular Function GO:0043565; sequence-specific DNA binding; Molecular Function GO:0045449; regulation of transcription; Biological Process	hypothetical protein; K13424 WRKY transcription factor 33
Pa2	21006161	Pm007043	NA	NA	NA	NA	NA
Pa2	21528800	Pm007113	2	IPR001471; Pathogenesis-related transcriptional factor/ERF, DNA-binding IPR016177; DNA-binding, integrase-type	3	GO:0003677; DNA binding; Molecular Function GO:0003700; sequence-specific DNA binding transcription factor activity; Molecular Function GO:0006355; regulation of transcription, DNA-dependent; Biological Process	hypothetical protein LOC100244684; K09286 EREBP-like factor
Pa2	21528800	Pm007114	6	IPR000225; Armadillo IPR001841; Zinc finger, RING-type IPR003613; U box domain IPR011989; Armadillo-like helical IPR013083; Zinc finger, RING/FYVE/PHD-type IPR016024; Armadillo-type fold	6	GO:0000151; ubiquitin ligase complex; Cellular Component GO:0004842; ubiquitin-protein ligase activity; Molecular Function GO:0005488; binding; Molecular Function GO:0005515; protein binding; Molecular Function GO:0008270; zinc ion binding; Molecular Function GO:0016567; protein ubiquitination; Biological Process	zgc:158653; K12030 tripartite motif-containing protein 62
Pa2	23187398	Pm007304	NA	NA	NA	NA	NA
Pa2	23187398	Pm007305	NA	NA	NA	NA	NA
Pa2	23631056	Pm007351	4	IPR005067; Fatty acid desaturase, type 2 IPR005803; Stearoyl-ACP desaturase, conserved site IPR009078; Ferritin/ribonucleotide reductase-like IPR012348; Ribonucleotide reductase-related	6	GO:0006631; fatty acid metabolic process; Biological Process GO:0006633; fatty acid biosynthetic process; Biological Process GO:0016491; oxidoreductase activity; Molecular Function GO:0045300; acyl-[acyl-carrier-protein] desaturase activity; Molecular Function GO:0046914; transition metal ion binding; Molecular Function GO:0055114; oxidation-reduction process; Biological Process	Stearoy-ACP desaturase (EC:1.14.19.2); K03921 acyl-[acyl-carrier-protein] desaturase [EC:1.14.19.2]
Pa2	23631056	Pm007352	1	IPR004330; Transcription factor, FAR1-related	NA	NA	NA
Pa2	23893279	Pm007374	3	IPR002005; Rab GTPase activator IPR016664; Rab protein geranylgeranyltransferase component A, eukaryota IPR018203; GDP dissociation inhibitor	1	GO:0043087; regulation of GTPase activity; Biological Process	NA
Pa2	23893279	Pm007375	NA	NA	NA	NA	NA
Pa2	24149316	Pm007377	NA	NA	NA	NA	NA
Pa2	24149316	Pm007378	3	IPR001611; Leucine-rich repeat IPR002088; Protein prenyltransferase, alpha subunit IPR008940; Protein prenyltransferase	3	GO:0005515; protein binding; Molecular Function GO:0008318; protein prenyltransferase activity; Molecular Function GO:0018342; protein prenylation; Biological Process	hypothetical protein; K14050 geranylgeranyl transferase type-2 subunit alpha [EC:2.5.1.60]
Pa2	24352313	Pm007389	NA	NA	NA	NA	NA
Pa2	24352313	Pm007390	3	IPR011046; WD40 repeat-like-containing domain IPR013979; Translation initiation factor 2A, beta propellor-like domain IPR015943; WD40/YVTN repeat-like-containing domain	1	GO:0005515; protein binding; Molecular Function	eIF3-S9; eukaryotic translation initiation factor 3 subunit B; K03253 translation initiation factor eIF-3 subunit 9
Pa2	24438405	Pm007398	5	IPR002421; 5'-3' exonuclease, N-terminal IPR008918; Helix-hairpin-helix motif, class 2 IPR020045; 5'-3' exonuclease, C-terminal subdomain IPR020046; 5'-3' exonuclease, alpha-helical arch, N-terminal IPR020047; 5'-3' exonuclease, SAM-fold domain	3	GO:0003677; DNA binding; Molecular Function GO:0003824; catalytic activity; Molecular Function GO:0008409; 5'-3' exonuclease activity; Molecular Function	DNA polymerase I (POL I); K02335 DNA polymerase I [EC:2.7.7.7]
Pa2	24438405	Pm007399	1	IPR001753; Crotonase, core	2	GO:0003824; catalytic activity; Molecular Function GO:0008152; metabolic process; Biological Process	Enoyl-CoA hydratase, mitochondrial precursor, putative (EC:4.2.1.17); K05605 3-hydroxyisobutyryl-CoA hydrolase [EC:3.1.2.4]
Pa2	24793445	Pm007441	NA	NA	NA	NA	NA
Pa2	24793445	Pm007442	7	IPR000445; Helix-hairpin-helix motif IPR003265; HhH-GPD domain IPR003651; Endonuclease III-like, iron-sulphur cluster loop motif IPR004035; Endonuclease III, iron-sulphur binding site IPR004036; Endonuclease III, conserved site-2 IPR011257; DNA glycosylase IPR023170; Helix-turn-helix, base-excision DNA repair, C-terminal	6	GO:0003677; DNA binding; Molecular Function GO:0003824; catalytic activity; Molecular Function GO:0004519; endonuclease activity; Molecular Function GO:0006281; DNA repair; Biological Process GO:0006284; base-excision repair; Biological Process GO:0051539; 4 iron, 4 sulfur cluster binding; Molecular Function	endonuclease III, putative (EC:4.2.99.18); K10773 endonuclease III [EC:4.2.99.18]
Pa2	24954148	Pm007456	NA	NA	NA	NA	NA
Pa2	24954148	Pm007457	1	IPR008629; GUN4-like	NA	NA	NA
Pa2	25612665	Pm007516	NA	NA	NA	NA	NA
Pa2	25612665	Pm007517	NA	NA	NA	NA	NA
Pa2	25745590	Pm007533	NA	NA	NA	NA	NA
Pa2	25745590	Pm007534	NA	NA	NA	NA	NA
Pa2	26403405	Pm007595	NA	NA	NA	NA	hypothetical protein; K14311 nuclear pore complex protein Nup188
Pa2	26475701	Pm007602	3	IPR001026; Epsin domain, N-terminal IPR008942; ENTH/VHS IPR013809; Epsin-like, N-terminal	NA	NA	hypothetical protein LOC100267012; K12471 epsin
Pa2	26475701	Pm007603	1	IPR019716; Ribosomal protein L53, mitochondrial	NA	NA	NA
Pa2	26709510	Pm007624	3	IPR000157; Toll-Interleukin receptor IPR000767; Disease resistance protein IPR001611; Leucine-rich repeat	6	GO:0004888; transmembrane receptor activity; Molecular Function GO:0005515; protein binding; Molecular Function GO:0006952; defense response; Biological Process GO:0007165; signal transduction; Biological Process GO:0031224; intrinsic to membrane; Cellular Component GO:0045087; innate immune response; Biological Process	ATP binding / protein binding; K06685 maintenance of ploidy protein MOB1 (MPS1 binder 1)
Pa2	26709510	Pm007625	8	IPR001806; Ras GTPase IPR002041; Ran GTPase IPR003577; Ras small GTPase, Ras type IPR003578; Small GTPase, Rho type IPR003579; Ras small GTPase, Rab type IPR005225; Small GTP-binding protein IPR013753; Ras IPR020851; Small GTPase	8	GO:0003924; GTPase activity; Molecular Function GO:0005525; GTP binding; Molecular Function GO:0005622; intracellular; Cellular Component GO:0006886; intracellular protein transport; Biological Process GO:0006913; nucleocytoplasmic transport; Biological Process GO:0007165; signal transduction; Biological Process GO:0007264; small GTPase mediated signal transduction; Biological Process GO:0015031;…	RABA5E; RABA5E (RAB GTPASE HOMOLOG A5E); GTP binding; K07976 Rab family, other
Pa2	27324759	Pm007681	9	IPR000719; Protein kinase, catalytic domain IPR001611; Leucine-rich repeat IPR002290; Serine/threonine-protein kinase domain IPR003591; Leucine-rich repeat, typical subtype IPR008266; Tyrosine-protein kinase, active site IPR011009; Protein kinase-like domain IPR017441; Protein kinase, ATP binding site IPR017442; Serine/threonine-protein kinase-like domain IPR020635; Tyrosine-protein kinase, catal…	6	GO:0004672; protein kinase activity; Molecular Function GO:0004674; protein serine/threonine kinase activity; Molecular Function GO:0004713; protein tyrosine kinase activity; Molecular Function GO:0005515; protein binding; Molecular Function GO:0005524; ATP binding; Molecular Function GO:0006468; protein phosphorylation; Biological Process	hypothetical protein; K13420 LRR receptor-like serine/threonine-protein kinase FLS2 [EC:2.7.11.1]
Pa2	27937249	Pm007736	NA	NA	NA	NA	NA
Pa2	27937249	Pm007737	4	IPR001810; F-box domain, cyclin-like IPR006527; F-box associated domain, type 1 IPR017451; F-box associated interaction domain IPR022364; F-box domain, Skp2-like	1	GO:0005515; protein binding; Molecular Function	NA
Pa2	29270471	Pm007895	1	IPR013216; Methyltransferase type 11	2	GO:0008152; metabolic process; Biological Process GO:0008168; methyltransferase activity; Molecular Function	Ece2, 1810009K13Rik, 6330509A19Rik, 9630025D12Rik, BB127715, MGC144385, MGC144386; endothelin converting enzyme 2 (EC:3.4.24.71); K01415 endothelin-converting enzyme [EC:3.4.24.71]
Pa2	29768387	Pm007952	5	IPR003663; Sugar/inositol transporter IPR005828; General substrate transporter IPR005829; Sugar transporter, conserved site IPR016196; Major facilitator superfamily, general substrate transporter IPR020846; Major facilitator superfamily	6	GO:0005215; transporter activity; Molecular Function GO:0006810; transport; Biological Process GO:0016020; membrane; Cellular Component GO:0016021; integral to membrane; Cellular Component GO:0022891; substrate-specific transmembrane transporter activity; Molecular Function GO:0055085; transmembrane transport; Biological Process	SLC2A5; solute carrier family 2 (facilitated glucose/fructose transporter), member 5; K08143 MFS transporter, SP family, solute carrier family 2 (facilitated glucose/fructose transporter), member 5
Pa2	29768387	Pm007953	4	IPR003663; Sugar/inositol transporter IPR005828; General substrate transporter IPR016196; Major facilitator superfamily, general substrate transporter IPR020846; Major facilitator superfamily	6	GO:0005215; transporter activity; Molecular Function GO:0006810; transport; Biological Process GO:0016020; membrane; Cellular Component GO:0016021; integral to membrane; Cellular Component GO:0022891; substrate-specific transmembrane transporter activity; Molecular Function GO:0055085; transmembrane transport; Biological Process	DEHA2C11374p; K08139 MFS transporter, SP family, sugar:H+ symporter
Pa2	29805286	Pm007955	5	IPR003663; Sugar/inositol transporter IPR005828; General substrate transporter IPR005829; Sugar transporter, conserved site IPR016196; Major facilitator superfamily, general substrate transporter IPR020846; Major facilitator superfamily	6	GO:0005215; transporter activity; Molecular Function GO:0006810; transport; Biological Process GO:0016020; membrane; Cellular Component GO:0016021; integral to membrane; Cellular Component GO:0022891; substrate-specific transmembrane transporter activity; Molecular Function GO:0055085; transmembrane transport; Biological Process	similar to predicted protein; K08145 MFS transporter, SP family, solute carrier family 2 (facilitated glucose transporter), member 8
Pa2	30185263	Pm008006	3	IPR001461; Peptidase A1 IPR009007; Peptidase aspartic, catalytic IPR021109; Peptidase aspartic	2	GO:0004190; aspartic-type endopeptidase activity; Molecular Function GO:0006508; proteolysis; Biological Process	aspartyl protease family protein; K00924 [EC:2.7.1.-]
Pa2	30185263	Pm008007	3	IPR001461; Peptidase A1 IPR009007; Peptidase aspartic, catalytic IPR021109; Peptidase aspartic	2	GO:0004190; aspartic-type endopeptidase activity; Molecular Function GO:0006508; proteolysis; Biological Process	NA
Pa2	30497134	Pm008045	NA	NA	NA	NA	NA
Pa2	30497134	Pm008046	1	IPR006214; Inhibitor of apoptosis-promoting Bax1-related	NA	NA	hypothetical protein; K06890
Pa2	31251921	Pm008147	NA	NA	NA	NA	NA
Pa2	31251921	Pm008148	6	IPR001005; SANT domain, DNA binding IPR009057; Homeodomain-like IPR010561; DIRP IPR012287; Homeodomain-related IPR014778; Myb, DNA-binding IPR017884; SANT, eukarya	3	GO:0003677; DNA binding; Molecular Function GO:0005515; protein binding; Molecular Function GO:0045449; regulation of transcription; Biological Process	NA
Pa2	31415550	Pm008167	6	IPR001373; Cullin, N-terminal IPR011991; Winged helix-turn-helix transcription repressor DNA-binding IPR016157; Cullin, conserved site IPR016158; Cullin homology IPR016159; Cullin repeat-like-containing domain IPR019559; Cullin protein, neddylation domain	3	GO:0006511; ubiquitin-dependent protein catabolic process; Biological Process GO:0031461; cullin-RING ubiquitin ligase complex; Cellular Component GO:0031625; ubiquitin protein ligase binding; Molecular Function	Cullin-1, putative; K03347 cullin 1
Pa2	31415550	Pm008168	1	IPR005123; Oxoglutarate/iron-dependent oxygenase	1	GO:0016491; oxidoreductase activity; Molecular Function	hypothetical protein; K06892
Pa2	31515616	Pm008177	9	IPR001412; Aminoacyl-tRNA synthetase, class I, conserved site IPR002300; Aminoacyl-tRNA synthetase, class Ia IPR002301; Isoleucyl-tRNA synthetase IPR009008; Valyl/Leucyl/Isoleucyl-tRNA synthetase, class Ia, editing domain IPR009080; Aminoacyl-tRNA synthetase, class 1a, anticodon-binding IPR010663; Zinc finger, DNA glycosylase/AP lyase/isoleucyl tRNA synthetase IPR013155; Valyl/Leucyl/Isoleucyl-tR…	9	GO:0000166; nucleotide binding; Molecular Function GO:0003824; catalytic activity; Molecular Function GO:0004812; aminoacyl-tRNA ligase activity; Molecular Function GO:0004822; isoleucine-tRNA ligase activity; Molecular Function GO:0005524; ATP binding; Molecular Function GO:0005737; cytoplasm; Cellular Component GO:0006412; translation; Biological Process GO:0006418; tRNA aminoacylation for prot…	isoleucyl tRNA synthetase, putative (EC:6.1.1.5); K01870 isoleucyl-tRNA synthetase [EC:6.1.1.5]
Pa2	32870939	Pm008396	NA	NA	NA	NA	NA
Pa2	32870939	Pm008397	4	IPR001079; Galectin, carbohydrate recognition domain IPR002659; Glycosyl transferase, family 31 IPR008985; Concanavalin A-like lectin/glucanase IPR013320; Concanavalin A-like lectin/glucanase, subgroup	4	GO:0005529; sugar binding; Molecular Function GO:0006486; protein glycosylation; Biological Process GO:0008378; galactosyltransferase activity; Molecular Function GO:0016020; membrane; Cellular Component	hypothetical protein LOC100244775; K14413 beta-1,3-galactosyltransferase [EC:2.4.1.-]
Pa2	33321747	Pm008456	11	IPR000409; BEACH domain IPR001680; WD40 repeat IPR011009; Protein kinase-like domain IPR011046; WD40 repeat-like-containing domain IPR011989; Armadillo-like helical IPR015943; WD40/YVTN repeat-like-containing domain IPR017442; Serine/threonine-protein kinase-like domain IPR017986; WD40-repeat-containing domain IPR019775; WD40 repeat, conserved site IPR019781; WD40 repeat, subgroup	5	GO:0004672; protein kinase activity; Molecular Function GO:0005488; binding; Molecular Function GO:0005515; protein binding; Molecular Function GO:0005524; ATP binding; Molecular Function GO:0006468; protein phosphorylation; Biological Process	hypothetical protein; K13124 mitogen-activated protein kinase organizer 1
Pa2	33321747	Pm008457	3	IPR002083; MATH IPR008974; TRAF-like IPR013322; TRAF-type	1	GO:0005515; protein binding; Molecular Function	hypothetical protein; K11838 ubiquitin carboxyl-terminal hydrolase 7 [EC:3.1.2.15]
Pa2	33372797	Pm008462	3	IPR002083; MATH IPR008974; TRAF-like IPR013322; TRAF-type	1	GO:0005515; protein binding; Molecular Function	hypothetical protein LOC100266796; K11838 ubiquitin carboxyl-terminal hydrolase 7 [EC:3.1.2.15]
Pa2	33372797	Pm008463	3	IPR002083; MATH IPR008974; TRAF-like IPR013322; TRAF-type	1	GO:0005515; protein binding; Molecular Function	hypothetical protein LOC100244518; K11838 ubiquitin carboxyl-terminal hydrolase 7 [EC:3.1.2.15]
Pa2	33490512	Pm008478	7	IPR000719; Protein kinase, catalytic domain IPR002290; Serine/threonine-protein kinase domain IPR008271; Serine/threonine-protein kinase, active site IPR011009; Protein kinase-like domain IPR017441; Protein kinase, ATP binding site IPR017442; Serine/threonine-protein kinase-like domain IPR020635; Tyrosine-protein kinase, catalytic domain	4	GO:0004672; protein kinase activity; Molecular Function GO:0004674; protein serine/threonine kinase activity; Molecular Function GO:0005524; ATP binding; Molecular Function GO:0006468; protein phosphorylation; Biological Process	hypothetical protein; K13430 serine/threonine-protein kinase PBS1 [EC:2.7.11.1]
Pa2	33490512	Pm008479	1	IPR004853; Domain of unknown function DUF250	NA	NA	hypothetical protein ; K03515 DNA repair protein REV1 [EC:2.7.7.-]
Pa2	33532670	Pm008490	3	IPR003594; ATPase-like, ATP-binding domain IPR005467; Signal transduction histidine kinase, core IPR018955; Branched-chain alpha-ketoacid dehydrogenase kinase/Pyruvate dehydrogenase kinase, N-terminal	5	GO:0000155; two-component sensor activity; Molecular Function GO:0004673; protein histidine kinase activity; Molecular Function GO:0005524; ATP binding; Molecular Function GO:0007165; signal transduction; Biological Process GO:0018106; peptidyl-histidine phosphorylation; Biological Process	pyruvate dehydrogenase, putative (EC:2.7.11.2); K00898 pyruvate dehydrogenase kinase [EC:2.7.11.2]
Pa2	33532670	Pm008491	4	IPR003656; Zinc finger, BED-type predicted IPR007021; Domain of unknown function DUF659 IPR008906; HAT dimerisation IPR012337; Ribonuclease H-like	3	GO:0003676; nucleic acid binding; Molecular Function GO:0003677; DNA binding; Molecular Function GO:0046983; protein dimerization activity; Molecular Function	hypothetical protein LOC100266583; K00036 glucose-6-phosphate 1-dehydrogenase [EC:1.1.1.49]
Pa2	33630922	Pm008508	NA	NA	NA	NA	NA
Pa2	33630922	Pm008509	NA	NA	NA	NA	NA
Pa2	34806490	Pm008645	7	IPR002314; Aminoacyl-tRNA synthetase, class II (G/ H/ P/ S), conserved domain IPR002316; Prolyl-tRNA synthetase, class IIa IPR004154; Anticodon-binding IPR004499; Prolyl-tRNA synthetase, class IIa, eukaryotic-type IPR006195; Aminoacyl-tRNA synthetase, class II IPR016061; Prolyl-tRNA synthetase, class II, C-terminal IPR017449; Prolyl-tRNA synthetase, class II	8	GO:0000166; nucleotide binding; Molecular Function GO:0004812; aminoacyl-tRNA ligase activity; Molecular Function GO:0004827; proline-tRNA ligase activity; Molecular Function GO:0005524; ATP binding; Molecular Function GO:0005737; cytoplasm; Cellular Component GO:0006412; translation; Biological Process GO:0006418; tRNA aminoacylation for protein translation; Biological Process GO:0006433; prolyl…	hypothetical protein; K01881 prolyl-tRNA synthetase [EC:6.1.1.15]
Pa2	36312283	Pm008806	1	IPR010678; Digestive organ expansion factor, predicted	1	GO:0005634; nucleus; Cellular Component	NA
Pa6	10678701	Pm021698	2	IPR001878; Zinc finger, CCHC-type IPR013084; Zinc finger, CCHC retroviral-type	2	GO:0003676; nucleic acid binding; Molecular Function GO:0008270; zinc ion binding; Molecular Function	hypothetical protein LOC100250334; K09250 cellular nucleic acid-binding protein
Pa6	10678701	Pm021699	NA	NA	NA	NA	NA
Pa6	10683993	Pm021699	NA	NA	NA	NA	NA
Pa6	10683993	Pm021700	3	IPR001597; Aromatic amino acid beta-eliminating lyase/threonine aldolase IPR015421; Pyridoxal phosphate-dependent transferase, major region, subdomain 1 IPR015424; Pyridoxal phosphate-dependent transferase, major domain	4	GO:0003824; catalytic activity; Molecular Function GO:0006520; cellular amino acid metabolic process; Biological Process GO:0016829; lyase activity; Molecular Function GO:0030170; pyridoxal phosphate binding; Molecular Function	hypothetical protein LOC100265578; K01620 threonine aldolase [EC:4.1.2.5]
Pa6	13285954	Pm022028	NA	NA	NA	NA	NA
Pa6	13285954	Pm022029	NA	NA	NA	NA	NA
Pa6	13824385	Pm022088	NA	NA	NA	NA	NA
Pa6	15360262	Pm022236	1	IPR011990; Tetratricopeptide-like helical	1	GO:0005488; binding; Molecular Function	NA
Pa6	16453150	Pm022331	5	IPR000183; Ornithine/DAP/Arg decarboxylase IPR002433; Ornithine decarboxylase IPR009006; Alanine racemase/group IV decarboxylase, C-terminal IPR022643; Orn/DAP/Arg decarboxylase 2, C-terminal IPR022644; Orn/DAP/Arg decarboxylase 2, N-terminal	2	GO:0003824; catalytic activity; Molecular Function GO:0006596; polyamine biosynthetic process; Biological Process	hypothetical protein LOC100249162; K01581 ornithine decarboxylase [EC:4.1.1.17]
Pa6	16453150	Pm022332	2	IPR001611; Leucine-rich repeat IPR013210; Leucine-rich repeat-containing N-terminal, type 2	1	GO:0005515; protein binding; Molecular Function	hypothetical protein; K13420 LRR receptor-like serine/threonine-protein kinase FLS2 [EC:2.7.11.1]
Pa6	16626616	Pm022344	NA	NA	NA	NA	NA
Pa6	16626616	Pm022345	7	IPR005833; Haloacid dehydrogenase/epoxide hydrolase IPR005834; Haloacid dehalogenase-like hydrolase IPR006402; HAD-superfamily hydrolase, subfamily IA, variant 3 IPR015865; Riboflavin kinase domain, bacterial/eukaryotic IPR023214; HAD-like domain IPR023465; Riboflavin kinase domain IPR023468; Riboflavin kinase	5	GO:0003824; catalytic activity; Molecular Function GO:0008152; metabolic process; Biological Process GO:0008531; riboflavin kinase activity; Molecular Function GO:0009231; riboflavin biosynthetic process; Biological Process GO:0016787; hydrolase activity; Molecular Function	riboflavin kinase/fmn adenylyltransferase, putative (EC:3.1.3.18 2.7.1.26); K00861 riboflavin kinase [EC:2.7.1.26]
Pa6	16660592	Pm022348	NA	NA	NA	NA	NA
Pa6	16660592	Pm022349	1	IPR016159; Cullin repeat-like-containing domain	NA	NA	NA
Pa6	17255610	Pm022406	2	IPR004255; O-acyltransferase, WSD1, N-terminal IPR009721; O-acyltransferase, WSD1, C-terminal	1	GO:0004144; diacylglycerol O-acyltransferase activity; Molecular Function	NA
Pa6	18074003	Pm022483	9	IPR000719; Protein kinase, catalytic domain IPR001245; Serine-threonine/tyrosine-protein kinase IPR002290; Serine/threonine-protein kinase domain IPR002902; Gnk2-homologous domain IPR008271; Serine/threonine-protein kinase, active site IPR011009; Protein kinase-like domain IPR017441; Protein kinase, ATP binding site IPR017442; Serine/threonine-protein kinase-like domain IPR020635; Tyrosine-protei…	4	GO:0004672; protein kinase activity; Molecular Function GO:0004674; protein serine/threonine kinase activity; Molecular Function GO:0005524; ATP binding; Molecular Function GO:0006468; protein phosphorylation; Biological Process	receptor serine-threonine protein kinase, putative (EC:2.7.10.2); K04733 interleukin-1 receptor-associated kinase 4 [EC:2.7.11.1]
Pa6	18616860	Pm022539	5	IPR000157; Toll-Interleukin receptor IPR000767; Disease resistance protein IPR001611; Leucine-rich repeat IPR002182; NB-ARC IPR003591; Leucine-rich repeat, typical subtype	8	GO:0004888; transmembrane receptor activity; Molecular Function GO:0005515; protein binding; Molecular Function GO:0005524; ATP binding; Molecular Function GO:0006915; apoptosis; Biological Process GO:0006952; defense response; Biological Process GO:0007165; signal transduction; Biological Process GO:0031224; intrinsic to membrane; Cellular Component GO:0045087; innate immune response; Biological…	GA10197 gene product from transcript GA10197-RA; K01768 adenylate cyclase [EC:4.6.1.1]
Pa6	18616860	Pm022540	5	IPR000157; Toll-Interleukin receptor IPR000767; Disease resistance protein IPR001611; Leucine-rich repeat IPR002182; NB-ARC IPR003591; Leucine-rich repeat, typical subtype	8	GO:0004888; transmembrane receptor activity; Molecular Function GO:0005515; protein binding; Molecular Function GO:0005524; ATP binding; Molecular Function GO:0006915; apoptosis; Biological Process GO:0006952; defense response; Biological Process GO:0007165; signal transduction; Biological Process GO:0031224; intrinsic to membrane; Cellular Component GO:0045087; innate immune response; Biological…	Disease resistance protein RPM1, putative (EC:3.1.3.16); K13457 disease resistance protein RPM1
Pa6	19186840	Pm022603	4	IPR003613; U box domain IPR011989; Armadillo-like helical IPR013083; Zinc finger, RING/FYVE/PHD-type IPR016024; Armadillo-type fold	4	GO:0000151; ubiquitin ligase complex; Cellular Component GO:0004842; ubiquitin-protein ligase activity; Molecular Function GO:0005488; binding; Molecular Function GO:0016567; protein ubiquitination; Biological Process	hypothetical protein; K09561 STIP1 homology and U-box containing protein 1 [EC:6.3.2.19]
Pa6	19186840	Pm022604	NA	NA	NA	NA	NA
Pa6	19742363	Pm022671	1	IPR003728; Ribosome maturation factor RimP	NA	NA	NA
Pa6	19858061	Pm022685	2	IPR004776; Auxin efflux carrier IPR014024; Auxin efflux carrier, plant type	2	GO:0016021; integral to membrane; Cellular Component GO:0055085; transmembrane transport; Biological Process	hypothetical protein LOC100250503; K13947 auxin efflux carrier family
Pa6	19858061	Pm022686	NA	NA	NA	NA	NA
Pa6	20192526	Pm022726	5	IPR001085; Serine hydroxymethyltransferase IPR015421; Pyridoxal phosphate-dependent transferase, major region, subdomain 1 IPR015422; Pyridoxal phosphate-dependent transferase, major region, subdomain 2 IPR015424; Pyridoxal phosphate-dependent transferase, major domain IPR019798; Serine hydroxymethyltransferase, pyridoxal phosphate binding site	5	GO:0003824; catalytic activity; Molecular Function GO:0004372; glycine hydroxymethyltransferase activity; Molecular Function GO:0006544; glycine metabolic process; Biological Process GO:0006563; L-serine metabolic process; Biological Process GO:0030170; pyridoxal phosphate binding; Molecular Function	similar to plastid serine hydroxymethyltransferase; K00600 glycine hydroxymethyltransferase [EC:2.1.2.1]
Pa6	20224588	Pm022731	NA	NA	NA	NA	NA
Pa6	20224588	Pm022732	5	IPR001950; Translation initiation factor SUI1 IPR002478; Pseudouridine synthase/archaeosine transglycosylase IPR003121; SWIB/MDM2 domain IPR004521; Uncharacterised conserved domain CHP00451 IPR015947; Pseudouridine synthase/archaeosine transglycosylase-like	4	GO:0003723; RNA binding; Molecular Function GO:0003743; translation initiation factor activity; Molecular Function GO:0005515; protein binding; Molecular Function GO:0006413; translational initiation; Biological Process	translation machinery-associated protein, putative; K07575 PUA domain protein
Pa6	20499550	Pm022769	3	IPR000767; Disease resistance protein IPR001611; Leucine-rich repeat IPR002182; NB-ARC	4	GO:0005515; protein binding; Molecular Function GO:0005524; ATP binding; Molecular Function GO:0006915; apoptosis; Biological Process GO:0006952; defense response; Biological Process	Disease resistance protein RPM1, putative (EC:3.1.3.16); K13457 disease resistance protein RPM1
Pa6	20499550	Pm022770	1	IPR008528; Protein of unknown function DUF810	NA	NA	NA
Pa6	20664080	Pm022789	2	IPR003480; Transferase IPR023213; Chloramphenicol acetyltransferase-like domain	1	GO:0016747; transferase activity, transferring acyl groups other than amino-acyl groups; Molecular Function	hypothetical protein LOC100265530; K13065 shikimate O-hydroxycinnamoyltransferase [EC:2.3.1.133]
Pa6	20708819	Pm022795	1	IPR002912; Amino acid-binding ACT	2	GO:0008152; metabolic process; Biological Process GO:0016597; amino acid binding; Molecular Function	NA
Pa6	20708819	Pm022796	NA	NA	NA	NA	NA
Pa6	20940585	Pm022830	4	IPR000368; Sucrose synthase IPR001296; Glycosyl transferase, group 1 IPR006380; Sucrose-phosphate synthase IPR012819; Sucrose phosphate synthase, plant	3	GO:0005985; sucrose metabolic process; Biological Process GO:0009058; biosynthetic process; Biological Process GO:0046524; sucrose-phosphate synthase activity; Molecular Function	sucrose phosphate syntase, putative (EC:2.4.1.14); K00696 sucrose-phosphate synthase [EC:2.4.1.14]
Pa6	20940585	Pm022831	2	IPR001611; Leucine-rich repeat IPR003591; Leucine-rich repeat, typical subtype	1	GO:0005515; protein binding; Molecular Function	ERBB2IP; erbb2 interacting protein; K12796 erbb2-interacting protein
Pa7	5030091	Pm023441	4	IPR000425; Major intrinsic protein IPR012269; Aquaporin IPR022357; Major intrinsic protein, conserved site IPR023271; Aquaporin-like	5	GO:0005215; transporter activity; Molecular Function GO:0006810; transport; Biological Process GO:0016020; membrane; Cellular Component GO:0016021; integral to membrane; Cellular Component GO:0055085; transmembrane transport; Biological Process	TIP2;3; AtTIP2;3; ammonia transporter/ methylammonium transmembrane transporter/ water channel; K09873 aquaporin TIP
Pa7	5030091	Pm023442	3	IPR003107; RNA-processing protein, HAT helix IPR011990; Tetratricopeptide-like helical IPR013026; Tetratricopeptide repeat-containing	4	GO:0005488; binding; Molecular Function GO:0005515; protein binding; Molecular Function GO:0005622; intracellular; Cellular Component GO:0006396; RNA processing; Biological Process	hypothetical protein LOC100255371; K12869 crooked neck
Pa7	5205285	Pm023460	1	IPR006869; Domain of unknown function DUF547	NA	NA	NA
Pa7	6229673	Pm023560	NA	NA	NA	NA	NA
Pa7	6229673	Pm023561	1	IPR003676; Auxin responsive SAUR protein	NA	NA	SAUR18; SAUR family protein; K14488 SAUR family protein
Pa7	7961975	Pm023759	2	IPR003103; Apoptosis regulator, Bcl-2 protein, BAG IPR019955; Ubiquitin supergroup	1	GO:0006915; apoptosis; Biological Process	NA
Pa7	7961975	Pm023760	1	IPR002528; Multi antimicrobial extrusion protein	5	GO:0006855; drug transmembrane transport; Biological Process GO:0015238; drug transmembrane transporter activity; Molecular Function GO:0015297; antiporter activity; Molecular Function GO:0016020; membrane; Cellular Component GO:0055085; transmembrane transport; Biological Process	NA
Pa7	7969003	Pm023759	2	IPR003103; Apoptosis regulator, Bcl-2 protein, BAG IPR019955; Ubiquitin supergroup	1	GO:0006915; apoptosis; Biological Process	NA
Pa7	7969003	Pm023760	1	IPR002528; Multi antimicrobial extrusion protein	5	GO:0006855; drug transmembrane transport; Biological Process GO:0015238; drug transmembrane transporter activity; Molecular Function GO:0015297; antiporter activity; Molecular Function GO:0016020; membrane; Cellular Component GO:0055085; transmembrane transport; Biological Process	NA
Pa7	8040466	Pm023766	2	IPR001471; Pathogenesis-related transcriptional factor/ERF, DNA-binding IPR016177; DNA-binding, integrase-type	3	GO:0003677; DNA binding; Molecular Function GO:0003700; sequence-specific DNA binding transcription factor activity; Molecular Function GO:0006355; regulation of transcription, DNA-dependent; Biological Process	CBF1; CBF1 (C-REPEAT/DRE BINDING FACTOR 1); DNA binding / transcription activator/ transcription factor; K09286 EREBP-like factor
Pa7	8040466	Pm023767	2	IPR001471; Pathogenesis-related transcriptional factor/ERF, DNA-binding IPR016177; DNA-binding, integrase-type	3	GO:0003677; DNA binding; Molecular Function GO:0003700; sequence-specific DNA binding transcription factor activity; Molecular Function GO:0006355; regulation of transcription, DNA-dependent; Biological Process	CBF1; CBF1 (C-REPEAT/DRE BINDING FACTOR 1); DNA binding / transcription activator/ transcription factor; K09286 EREBP-like factor
Pa7	8208881	Pm023785	2	IPR001938; Thaumatin, pathogenesis-related IPR017949; Thaumatin, conserved site	NA	NA	NA
Pa7	8208881	Pm023786	6	IPR001005; SANT domain, DNA binding IPR009057; Homeodomain-like IPR012287; Homeodomain-related IPR014778; Myb, DNA-binding IPR015495; Myb transcription factor IPR017930; Transcription regulator HTH, Myb-type, DNA-binding	3	GO:0003677; DNA binding; Molecular Function GO:0005515; protein binding; Molecular Function GO:0045449; regulation of transcription; Biological Process	MYB211; hypothetical protein; K09422 myb proto-oncogene protein, plant
Pa7	8767375	Pm023849	3	IPR002305; Aminoacyl-tRNA synthetase, class Ib IPR002307; Tyrosyl-tRNA synthetase, class Ib IPR014729; Rossmann-like alpha/beta/alpha sandwich fold	8	GO:0000166; nucleotide binding; Molecular Function GO:0004812; aminoacyl-tRNA ligase activity; Molecular Function GO:0004831; tyrosine-tRNA ligase activity; Molecular Function GO:0005524; ATP binding; Molecular Function GO:0005737; cytoplasm; Cellular Component GO:0006412; translation; Biological Process GO:0006418; tRNA aminoacylation for protein translation; Biological Process GO:0006437; tyros…	hypothetical protein LOC100251282; K01866 tyrosyl-tRNA synthetase [EC:6.1.1.1]
Pa7	8767375	Pm023850	3	IPR000007; Tubby, C-terminal IPR000649; Initiation factor 2B-related IPR007612; Protein of unknown function DUF567	1	GO:0044237; cellular metabolic process; Biological Process	similar to GTP binding / translation initiation factor; K03239 translation initiation factor eIF-2B alpha subunit
Pa7	9124743	Pm023901	6	IPR000719; Protein kinase, catalytic domain IPR002290; Serine/threonine-protein kinase domain IPR011009; Protein kinase-like domain IPR017441; Protein kinase, ATP binding site IPR017442; Serine/threonine-protein kinase-like domain IPR020635; Tyrosine-protein kinase, catalytic domain	4	GO:0004672; protein kinase activity; Molecular Function GO:0004674; protein serine/threonine kinase activity; Molecular Function GO:0005524; ATP binding; Molecular Function GO:0006468; protein phosphorylation; Biological Process	putative MAP3K alpha 1 protein kinase (ISS); K11228 mitogen-activated protein kinase kinase kinase [EC:2.7.11.-]
Pa7	9124743	Pm023902	1	IPR015300; DNA-binding pseudobarrel domain	NA	NA	NA
Pa7	9696349	Pm023980	1	IPR004265; Plant disease resistance response protein	NA	NA	NA
Pa7	9696349	Pm023981	5	IPR000689; Ubiquinone biosynthesis monooxygenase, COQ6-type IPR002938; Monooxygenase, FAD-binding IPR003042; Aromatic-ring hydroxylase-like IPR010971; Ubiquinone biosynthesis hydroxylase, UbiH/UbiF/VisC/COQ6 IPR018168; Ubiquinone biosynthesis hydroxylase, UbiH/UbiF/VisC/COQ6, conserved site	7	GO:0004497; monooxygenase activity; Molecular Function GO:0006744; ubiquinone biosynthetic process; Biological Process GO:0008152; metabolic process; Biological Process GO:0016491; oxidoreductase activity; Molecular Function GO:0016709; oxidoreductase activity, acting on paired donors, with incorporation or reduction of molecular oxygen, NADH or NADPH as one donor, and incorporation of one atom o…	hypothetical protein LOC100248856; K06126 ubiquinone biosynthesis monooxygenase Coq6 [EC:1.14.13.-]
Pa7	10142473	Pm024051	5	IPR001701; Glycoside hydrolase, family 9 IPR008928; Six-hairpin glycosidase-like IPR012341; Six-hairpin glycosidase IPR018221; Glycoside hydrolase, family 9, active site IPR019028; Carbohydrate binding domain CBM49	5	GO:0003824; catalytic activity; Molecular Function GO:0004553; hydrolase activity, hydrolyzing O-glycosyl compounds; Molecular Function GO:0005576; extracellular region; Cellular Component GO:0005975; carbohydrate metabolic process; Biological Process GO:0030246; carbohydrate binding; Molecular Function	endoglucanase (EC:3.2.1.4); K01179 endoglucanase [EC:3.2.1.4]
Pa7	10142473	Pm024052	NA	NA	NA	NA	NA
Pa7	11363248	Pm024248	2	IPR003340; Transcriptional factor B3 IPR015300; DNA-binding pseudobarrel domain	2	GO:0003677; DNA binding; Molecular Function GO:0006355; regulation of transcription, DNA-dependent; Biological Process	hypothetical protein LOC100262843; K09287 RAV-like factor
Pa7	11363248	Pm024249	NA	NA	NA	NA	NA
