# Supplementary material for: Mapping Floral Genetic Architecture in Prunus mume, an Ornamental Woody Plant
Source: Frontiers journal article supplement (doi:10.3389/fpls.2022.828579), 2022-02-08
Supplement: Table_3.XLS [file Table_3.XLS]

## Sheet: A-Floral Diameter
PmID	PmPosition	gene	GENE_num	GENE	GO_num	GO	KEGG
Pa1	8287854	Pm001238	4	IPR001223; Glycoside hydrolase, family 18, catalytic domain IPR001579; Glycoside hydrolase, chitinase active site IPR013781; Glycoside hydrolase, subgroup, catalytic core IPR017853; Glycoside hydrolase, superfamily	4	GO:0003824; catalytic activity; Molecular Function GO:0004553; hydrolase activity, hydrolyzing O-glycosyl compounds; Molecular Function GO:0005975; carbohydrate metabolic process; Biological Process GO:0043169; cation binding; Molecular Function	NA
Pa1	8287854	Pm001239	NA	NA	NA	NA	NA
Pa1	10863156	Pm001512	3	IPR001296; Glycosyl transferase, group 1 IPR011835; Glycogen/starch synthases, ADP-glucose type IPR013534; Starch synthase, catalytic domain	3	GO:0009011; starch synthase activity; Molecular Function GO:0009058; biosynthetic process; Biological Process GO:0009250; glucan biosynthetic process; Biological Process	hypothetical protein; K00703 starch synthase [EC:2.4.1.21]
Pa2	31600467	Pm008188	4	IPR011057; Mss4-like IPR011323; Mss4/translationally controlled tumour-associated TCTP IPR018103; Translationally controlled tumour protein, conserved site IPR018105; Translationally controlled tumour protein	NA	NA	NA

## Sheet: B-Pedicel Length
PmID	PmPosition	gene	GENE_num	GENE	GO_num	GO	KEGG
Pa3	5661905	Pm010621	9	IPR002171; Ribosomal protein L2 IPR008991; Translation protein SH3-like IPR012340; Nucleic acid-binding, OB-fold IPR014722; Translation protein SH3-like, subgroup IPR014726; Ribosomal protein L2, domain 3 IPR016027; Nucleic acid-binding, OB-fold-like IPR022666; Ribosomal Proteins L2, RNA binding domain IPR022669; Ribosomal protein L2, C-terminal IPR022671; Ribosomal protein L2, conserved site	4	GO:0003735; structural constituent of ribosome; Molecular Function GO:0005622; intracellular; Cellular Component GO:0005840; ribosome; Cellular Component GO:0006412; translation; Biological Process	hypothetical protein; K02938 large subunit ribosomal protein L8e
Pa3	5661905	Pm010622	3	IPR001509; NAD-dependent epimerase/dehydratase IPR005886; UDP-glucose 4-epimerase IPR016040; NAD(P)-binding domain	7	GO:0003824; catalytic activity; Molecular Function GO:0003978; UDP-glucose 4-epimerase activity; Molecular Function GO:0005488; binding; Molecular Function GO:0006012; galactose metabolic process; Biological Process GO:0008152; metabolic process; Biological Process GO:0044237; cellular metabolic process; Biological Process GO:0050662; coenzyme binding; Molecular Function	UDP-glucose 4-epimerase, putative (EC:5.1.3.5); K12448 UDP-arabinose 4-epimerase [EC:5.1.3.5]
Pa3	5700891	Pm010628	8	IPR003347; Transcription factor jumonji/aspartyl beta-hydroxylase IPR003349; Transcription factor jumonji, JmjN IPR003888; FY-rich, N-terminal IPR003889; FY-rich, C-terminal IPR004198; Zinc finger, C5HC2-type IPR013129; Transcription factor jumonji IPR018516; FY-rich, C-terminal subgroup IPR018518; FY-rich, N-terminal subgroup	3	GO:0003677; DNA binding; Molecular Function GO:0005515; protein binding; Molecular Function GO:0005634; nucleus; Cellular Component	kdm5a; lysine (K)-specific demethylase 5A; K11446 histone demethylase JARID1 [EC:1.14.11.-]
Pa3	5700891	Pm010629	1	IPR000782; FAS1 domain	NA	NA	NA
Pa4	14586755	Pm014660	2	IPR000727; Target SNARE coiled-coil domain IPR005606; Sec20	1	GO:0005515; protein binding; Molecular Function	NPSN11; NPSN11 (NOVEL PLANT SNARE 11); SNAP receptor/ protein transporter; K08494 novel plant SNARE
Pa4	14586755	Pm014661	7	IPR000719; Protein kinase, catalytic domain IPR002290; Serine/threonine-protein kinase domain IPR008271; Serine/threonine-protein kinase, active site IPR011009; Protein kinase-like domain IPR017441; Protein kinase, ATP binding site IPR017442; Serine/threonine-protein kinase-like domain IPR020635; Tyrosine-protein kinase, catalytic domain	4	GO:0004672; protein kinase activity; Molecular Function GO:0004674; protein serine/threonine kinase activity; Molecular Function GO:0005524; ATP binding; Molecular Function GO:0006468; protein phosphorylation; Biological Process	protein kinase, putative; K00924 [EC:2.7.1.-]
Pa5	20586232	Pm018802	3	IPR001023; Heat shock protein Hsp70 IPR013126; Heat shock protein 70 IPR018181; Heat shock protein 70, conserved site	1	GO:0005524; ATP binding; Molecular Function	hypothetical protein; K03283 heat shock 70kDa protein 1/8
Pa7	5895781	Pm023529	NA	NA	NA	NA	NA
Pa7	5895781	Pm023530	2	IPR000326; Phosphatidic acid phosphatase type 2/haloperoxidase IPR016118; Phosphatidic acid phosphatase/chloroperoxidase, N-terminal	2	GO:0003824; catalytic activity; Molecular Function GO:0016020; membrane; Cellular Component	NA
Pa8	8975532	Pm026285	3	IPR001461; Peptidase A1 IPR009007; Peptidase aspartic, catalytic IPR021109; Peptidase aspartic	2	GO:0004190; aspartic-type endopeptidase activity; Molecular Function GO:0006508; proteolysis; Biological Process	aspartyl protease family protein; K00924 [EC:2.7.1.-]
Pa8	8975532	Pm026286	4	IPR001650; Helicase, C-terminal IPR011545; DNA/RNA helicase, DEAD/DEAH box type, N-terminal IPR014001; DEAD-like helicase IPR014014; RNA helicase, DEAD-box type, Q motif	4	GO:0003676; nucleic acid binding; Molecular Function GO:0004386; helicase activity; Molecular Function GO:0005524; ATP binding; Molecular Function GO:0008026; ATP-dependent helicase activity; Molecular Function	LOS4; LOS4 (LOW EXPRESSION OF OSMOTICALLY RESPONSIVE GENES 4); ATP-dependent helicase/ RNA helicase/ RNA-dependent ATPase; K01529 [EC:3.6.1.-]

## Sheet: C-Shape
PmID	PmPosition	gene	GENE_num	GENE	GO_num	GO	KEGG
Pa2	4123427	Pm004331	1	IPR013078; Histidine phosphatase superfamily, clade-1	NA	NA	NA
Pa2	27457496	Pm007692	NA	NA	NA	NA	NA
Pa2	27457496	Pm007693	NA	NA	NA	NA	NA
Pa6	3220313	Pm020485	4	IPR003439; ABC transporter-like IPR003593; ATPase, AAA+ type, core IPR013525; ABC-2 type transporter IPR013581; Plant PDR ABC transporter associated	5	GO:0000166; nucleotide binding; Molecular Function GO:0005524; ATP binding; Molecular Function GO:0016020; membrane; Cellular Component GO:0016887; ATPase activity; Molecular Function GO:0017111; nucleoside-triphosphatase activity; Molecular Function	ABC multidrug transporter (EC:3.6.3.-); K01552 [EC:3.6.3.-]
Pa6	18573584	Pm022535	NA	NA	NA	NA	NA
Pa6	18658980	Pm022546	1	IPR008972; Cupredoxin	NA	NA	NA
Pa6	18658980	Pm022547	2	IPR002068; Heat shock protein Hsp20 IPR008978; HSP20-like chaperone	NA	NA	hypothetical protein; K13993 HSP20 family protein
Pa6	18760613	Pm022554	NA	NA	NA	NA	NA
Pa6	18760613	Pm022555	NA	NA	NA	NA	NA
Pa6	18887046	Pm022565	2	IPR002110; Ankyrin repeat IPR020683; Ankyrin repeat-containing domain	1	GO:0005515; protein binding; Molecular Function	YALI0B20900p; K06867
Pa6	19186840	Pm022603	4	IPR003613; U box domain IPR011989; Armadillo-like helical IPR013083; Zinc finger, RING/FYVE/PHD-type IPR016024; Armadillo-type fold	4	GO:0000151; ubiquitin ligase complex; Cellular Component GO:0004842; ubiquitin-protein ligase activity; Molecular Function GO:0005488; binding; Molecular Function GO:0016567; protein ubiquitination; Biological Process	hypothetical protein; K09561 STIP1 homology and U-box containing protein 1 [EC:6.3.2.19]
Pa6	19186840	Pm022604	NA	NA	NA	NA	NA
Pa6	19258583	Pm022606	2	IPR018108; Mitochondrial substrate/solute carrier IPR023395; Mitochondrial carrier domain	NA	NA	Protein dif-1; K03454 mitochondrial carrier protein, MC family
Pa6	19258583	Pm022607	5	IPR000728; AIR synthase-related protein IPR010073; Phosphoribosylformylglycinamidine synthase IPR010918; AIR synthase-related protein, C-terminal IPR016188; PurM, N-terminal-like IPR017926; Glutamine amidotransferase type 1	3	GO:0003824; catalytic activity; Molecular Function GO:0004642; phosphoribosylformylglycinamidine synthase activity; Molecular Function GO:0006189; 'de novo' IMP biosynthetic process; Biological Process	Phosphoribosylformylglycinamidine synthase, putative (EC:6.3.5.3); K01952 phosphoribosylformylglycinamidine synthase [EC:6.3.5.3]
Pa6	19785033	Pm022676	2	IPR002885; Pentatricopeptide repeat IPR011990; Tetratricopeptide-like helical	1	GO:0005488; binding; Molecular Function	Cell division protein ftsH, putative (EC:3.6.4.3); K03798 cell division protease FtsH [EC:3.4.24.-]
Pa6	19785033	Pm022677	1	IPR004253; Domain of unknown function DUF231, plant	NA	NA	NA
Pa6	19879752	Pm022688	NA	NA	NA	NA	NA
Pa6	19879752	Pm022689	6	IPR002085; Alcohol dehydrogenase superfamily, zinc-containing IPR002328; Alcohol dehydrogenase, zinc-containing, conserved site IPR011032; GroES-like IPR013149; Alcohol dehydrogenase, C-terminal IPR013154; Alcohol dehydrogenase GroES-like IPR016040; NAD(P)-binding domain	6	GO:0003824; catalytic activity; Molecular Function GO:0005488; binding; Molecular Function GO:0008152; metabolic process; Biological Process GO:0008270; zinc ion binding; Molecular Function GO:0016491; oxidoreductase activity; Molecular Function GO:0055114; oxidation-reduction process; Biological Process	alcohol dehydrogenase, putative (EC:1.1.1.284); K00001 alcohol dehydrogenase [EC:1.1.1.1]
Pa6	20112599	Pm022713	NA	NA	NA	NA	NA
Pa6	20112599	Pm022712	3	IPR000103; Pyridine nucleotide-disulphide oxidoreductase, class-II IPR013027; FAD-dependent pyridine nucleotide-disulphide oxidoreductase IPR020946; Flavin-containing monooxygenase-like	5	GO:0004499; flavin-containing monooxygenase activity; Molecular Function GO:0016491; oxidoreductase activity; Molecular Function GO:0050660; flavin adenine dinucleotide binding; Molecular Function GO:0050661; NADP or NADPH binding; Molecular Function GO:0055114; oxidation-reduction process; Biological Process	monooxygenase, putative (EC:1.14.13.8); K11816 YUCCA family monooxygenase [EC:1.14.13.-]
Pa6	20151973	Pm022717	NA	NA	NA	NA	NA
Pa6	20151973	Pm022718	NA	NA	NA	NA	NA
Pa6	20192380	Pm022726	5	IPR001085; Serine hydroxymethyltransferase IPR015421; Pyridoxal phosphate-dependent transferase, major region, subdomain 1 IPR015422; Pyridoxal phosphate-dependent transferase, major region, subdomain 2 IPR015424; Pyridoxal phosphate-dependent transferase, major domain IPR019798; Serine hydroxymethyltransferase, pyridoxal phosphate binding site	5	GO:0003824; catalytic activity; Molecular Function GO:0004372; glycine hydroxymethyltransferase activity; Molecular Function GO:0006544; glycine metabolic process; Biological Process GO:0006563; L-serine metabolic process; Biological Process GO:0030170; pyridoxal phosphate binding; Molecular Function	similar to plastid serine hydroxymethyltransferase; K00600 glycine hydroxymethyltransferase [EC:2.1.2.1]
Pa6	20301993	Pm022736	3	IPR004263; Exostosin-like IPR008979; Galactose-binding domain-like IPR012919; Sad1/UNC-like, C-terminal	1	GO:0016020; membrane; Cellular Component	hypothetical protein; K00249 acyl-CoA dehydrogenase [EC:1.3.99.3]
Pa6	20301993	Pm022737	6	IPR000157; Toll-Interleukin receptor IPR000767; Disease resistance protein IPR001611; Leucine-rich repeat IPR002182; NB-ARC IPR003591; Leucine-rich repeat, typical subtype IPR011713; Leucine-rich repeat 3	8	GO:0004888; transmembrane receptor activity; Molecular Function GO:0005515; protein binding; Molecular Function GO:0005524; ATP binding; Molecular Function GO:0006915; apoptosis; Biological Process GO:0006952; defense response; Biological Process GO:0007165; signal transduction; Biological Process GO:0031224; intrinsic to membrane; Cellular Component GO:0045087; innate immune response; Biological…	hypothetical protein LOC100252764; K13457 disease resistance protein RPM1
Pa6	20308283	Pm022737	6	IPR000157; Toll-Interleukin receptor IPR000767; Disease resistance protein IPR001611; Leucine-rich repeat IPR002182; NB-ARC IPR003591; Leucine-rich repeat, typical subtype IPR011713; Leucine-rich repeat 3	8	GO:0004888; transmembrane receptor activity; Molecular Function GO:0005515; protein binding; Molecular Function GO:0005524; ATP binding; Molecular Function GO:0006915; apoptosis; Biological Process GO:0006952; defense response; Biological Process GO:0007165; signal transduction; Biological Process GO:0031224; intrinsic to membrane; Cellular Component GO:0045087; innate immune response; Biological…	hypothetical protein LOC100252764; K13457 disease resistance protein RPM1
Pa6	21226196	Pm022860	5	IPR000157; Toll-Interleukin receptor IPR000767; Disease resistance protein IPR001611; Leucine-rich repeat IPR002182; NB-ARC IPR003591; Leucine-rich repeat, typical subtype	8	GO:0004888; transmembrane receptor activity; Molecular Function GO:0005515; protein binding; Molecular Function GO:0005524; ATP binding; Molecular Function GO:0006915; apoptosis; Biological Process GO:0006952; defense response; Biological Process GO:0007165; signal transduction; Biological Process GO:0031224; intrinsic to membrane; Cellular Component GO:0045087; innate immune response; Biological…	ATP binding / protein binding; K06685 maintenance of ploidy protein MOB1 (MPS1 binder 1)
Pa6	21226350	Pm022860	5	IPR000157; Toll-Interleukin receptor IPR000767; Disease resistance protein IPR001611; Leucine-rich repeat IPR002182; NB-ARC IPR003591; Leucine-rich repeat, typical subtype	8	GO:0004888; transmembrane receptor activity; Molecular Function GO:0005515; protein binding; Molecular Function GO:0005524; ATP binding; Molecular Function GO:0006915; apoptosis; Biological Process GO:0006952; defense response; Biological Process GO:0007165; signal transduction; Biological Process GO:0031224; intrinsic to membrane; Cellular Component GO:0045087; innate immune response; Biological…	ATP binding / protein binding; K06685 maintenance of ploidy protein MOB1 (MPS1 binder 1)
Pa8	12052992	Pm026828	NA	NA	NA	NA	NA
Pa8	12052992	Pm026829	NA	NA	NA	NA	NA

## Sheet: D-Petal Number
PmID	PmPosition	gene	GENE_num	GENE	GO_num	GO	KEGG
Pa2	34027093	Pm008553	1	IPR023150; Double Clp-N motif	NA	NA	endopeptidase (CLP homologue) ATP-binding chain; K01358 ATP-dependent Clp protease, protease subunit [EC:3.4.21.92]
Pa2	34027093	Pm008554	NA	NA	NA	NA	NA

## Sheet: E-Pistil Number
PmID	PmPosition	gene	GENE_num	GENE	GO_num	GO	KEGG
Pa4	16683515	Pm014980	1	IPR000048; IQ motif, EF-hand binding site	1	GO:0005515; protein binding; Molecular Function	NA
Pa6	17703307	Pm022456	1	IPR001828; Extracellular ligand-binding receptor	NA	NA	ATGLR2.1; intracellular ligand-gated ion channel; K05387 glutamate receptor, ionotropic, other eukaryote
Pa6	17703307	Pm022455	4	IPR001320; Ionotropic glutamate receptor IPR001638; Extracellular solute-binding protein, family 3 IPR001828; Extracellular ligand-binding receptor IPR017103; Ionotropic glutamate receptor, plant	6	GO:0004970; ionotropic glutamate receptor activity; Molecular Function GO:0005215; transporter activity; Molecular Function GO:0005234; extracellular-glutamate-gated ion channel activity; Molecular Function GO:0006810; transport; Biological Process GO:0016020; membrane; Cellular Component GO:0030288; outer membrane-bounded periplasmic space; Cellular Component	ATGLR2.8; intracellular ligand-gated ion channel; K05387 glutamate receptor, ionotropic, other eukaryote

## Sheet: F-Blossom Bud Number
PmID	PmPosition	gene	GENE_num	GENE	GO_num	GO	KEGG
Pa2	18753561	Pm006736	NA	NA	NA	NA	NA
Pa2	18753561	Pm006737	NA	NA	NA	NA	NA
Pa2	18870140	Pm006756	1	IPR006813; Glycosyl transferase, family 17	3	GO:0003830; beta-1,4-mannosylglycoprotein 4-beta-N-acetylglucosaminyltransferase activity; Molecular Function GO:0006487; protein N-linked glycosylation; Biological Process GO:0016020; membrane; Cellular Component	hypothetical protein LOC100254142; K00737 beta-1,4-mannosyl-glycoprotein beta-1,4-N-acetylglucosaminyltransferase [EC:2.4.1.144]
Pa2	18870140	Pm006757	2	IPR004249; NPH3 IPR011333; BTB/POZ fold	2	GO:0004871; signal transducer activity; Molecular Function GO:0009416; response to light stimulus; Biological Process	NA
Pa2	20697795	Pm006994	1	IPR005174; Protein of unknown function DUF295	NA	NA	NA
Pa2	20697795	Pm006995	1	IPR007484; Peptidase M28	2	GO:0006508; proteolysis; Biological Process GO:0008233; peptidase activity; Molecular Function	protein with unknown function; K02880 large subunit ribosomal protein L17e
Pa2	22128046	Pm007173	NA	NA	NA	NA	NA
Pa2	22128046	Pm007174	5	IPR009057; Homeodomain-like IPR012287; Homeodomain-related IPR014778; Myb, DNA-binding IPR015495; Myb transcription factor IPR017930; Transcription regulator HTH, Myb-type, DNA-binding	3	GO:0003677; DNA binding; Molecular Function GO:0005515; protein binding; Molecular Function GO:0045449; regulation of transcription; Biological Process	hypothetical protein LOC100253313; K09422 myb proto-oncogene protein, plant
Pa2	25499982	Pm007506	1	IPR008560; Protein of unknown function DUF842, eukaryotic	NA	NA	NA
Pa2	25499982	Pm007507	1	IPR021099; RNA recognition domain, plant	NA	NA	NA
Pa3	9771801	Pm011233	1	IPR006814; Photosystem II PsbR	3	GO:0009654; oxygen evolving complex; Cellular Component GO:0015979; photosynthesis; Biological Process GO:0042651; thylakoid membrane; Cellular Component	photosystem II subunit R (PsbR); K03541 photosystem II 10kDa protein
Pa3	9771801	Pm011234	1	IPR003441; No apical meristem (NAM) protein	2	GO:0003677; DNA binding; Molecular Function GO:0045449; regulation of transcription; Biological Process	NA
Pa3	14053814	Pm011838	3	IPR002683; Photosystem II PsbP, oxygen evolving complex IPR016123; Mog1/PsbP, alpha/beta/alpha sandwich IPR016124; Mog1/PsbP/DUF1795, alpha/beta/alpha sandwich	4	GO:0005509; calcium ion binding; Molecular Function GO:0009654; oxygen evolving complex; Cellular Component GO:0015979; photosynthesis; Biological Process GO:0019898; extrinsic to membrane; Cellular Component	NA
Pa3	15490685	Pm012024	NA	NA	NA	NA	NA
Pa3	15490685	Pm012025	NA	NA	NA	NA	NA
Pa8	77934	Pm025307	1	IPR003441; No apical meristem (NAM) protein	2	GO:0003677; DNA binding; Molecular Function GO:0045449; regulation of transcription; Biological Process	NA
Pa8	77934	Pm025308	NA	NA	NA	NA	NA
Pa8	3391514	Pm025604	NA	NA	NA	NA	NA
Pa8	3391514	Pm025605	NA	NA	NA	NA	NA
scaffold265	676596	Pm029502	1	IPR002913; Lipid-binding START	NA	NA	PDF2; PDF2 (PROTODERMAL FACTOR 2); DNA binding / transcription factor; K09338 homeobox-leucine zipper protein

## Sheet: G-Pistil Occurrence
PmID	PmPosition	gene	GENE_num	GENE	GO_num	GO	KEGG
Pa2	22242037	Pm007187	1	IPR004182; GRAM	NA	NA	NA
Pa5	21284194	Pm018929	2	IPR000967; Zinc finger, NF-X1-type IPR019786; Zinc finger, PHD-type, conserved site	4	GO:0003700; sequence-specific DNA binding transcription factor activity; Molecular Function GO:0005634; nucleus; Cellular Component GO:0006355; regulation of transcription, DNA-dependent; Biological Process GO:0008270; zinc ion binding; Molecular Function	GK18317 gene product from transcript GK18317-RA; K12236 transcriptional repressor NF-X1 [EC:6.3.2.-]
Pa5	21284194	Pm018930	9	IPR000719; Protein kinase, catalytic domain IPR002290; Serine/threonine-protein kinase domain IPR008271; Serine/threonine-protein kinase, active site IPR009091; Regulator of chromosome condensation/beta-lactamase-inhibitor protein II IPR011009; Protein kinase-like domain IPR013320; Concanavalin A-like lectin/glucanase, subgroup IPR017441; Protein kinase, ATP binding site IPR017442; Serine/threoni…	4	GO:0004672; protein kinase activity; Molecular Function GO:0004674; protein serine/threonine kinase activity; Molecular Function GO:0005524; ATP binding; Molecular Function GO:0006468; protein phosphorylation; Biological Process	Os03g0637800; K00924 [EC:2.7.1.-]
Pa8	806245	Pm025386	1	IPR021861; THO complex, subunit THOC1	NA	NA	hypothetical protein LOC100262610; K12878 THO complex subunit 1
Pa8	806245	Pm025387	NA	NA	NA	NA	NA
Pa8	1277787	Pm025424	4	IPR000210; BTB/POZ-like IPR001646; Pentapeptide repeat IPR003131; Potassium channel, voltage dependent, Kv, tetramerisation IPR011333; BTB/POZ fold	5	GO:0005249; voltage-gated potassium channel activity; Molecular Function GO:0005515; protein binding; Molecular Function GO:0006813; potassium ion transport; Biological Process GO:0008076; voltage-gated potassium channel complex; Cellular Component GO:0016020; membrane; Cellular Component	hypothetical protein ; K02882 large subunit ribosomal protein L18Ae
Pa8	1437211	Pm025436	6	IPR001005; SANT domain, DNA binding IPR009057; Homeodomain-like IPR012287; Homeodomain-related IPR014778; Myb, DNA-binding IPR015495; Myb transcription factor IPR017930; Transcription regulator HTH, Myb-type, DNA-binding	3	GO:0003677; DNA binding; Molecular Function GO:0005515; protein binding; Molecular Function GO:0045449; regulation of transcription; Biological Process	MYB053; hypothetical protein; K09422 myb proto-oncogene protein, plant
Pa8	1437211	Pm025437	NA	NA	NA	NA	NA
Pa8	6307918	Pm025908	NA	NA	NA	NA	NA
Pa8	6307918	Pm025909	3	IPR000767; Disease resistance protein IPR001611; Leucine-rich repeat IPR002182; NB-ARC	4	GO:0005515; protein binding; Molecular Function GO:0005524; ATP binding; Molecular Function GO:0006915; apoptosis; Biological Process GO:0006952; defense response; Biological Process	Disease resistance protein RPM1, putative (EC:3.1.3.16); K13457 disease resistance protein RPM1
Pa8	10327123	Pm026521	1	IPR009543; Vacuolar protein sorting-associated protein	1	GO:0008104; protein localization; Biological Process	NA
scaffold1318	8805	Pm028470	6	IPR001005; SANT domain, DNA binding IPR009057; Homeodomain-like IPR012287; Homeodomain-related IPR014778; Myb, DNA-binding IPR015495; Myb transcription factor IPR017930; Transcription regulator HTH, Myb-type, DNA-binding	3	GO:0003677; DNA binding; Molecular Function GO:0005515; protein binding; Molecular Function GO:0045449; regulation of transcription; Biological Process	MYB120; hypothetical protein; K09422 myb proto-oncogene protein, plant
scaffold1318	8805	Pm028471	NA	NA	NA	NA	NA

## Sheet: H-Petal Color
PmID	PmPosition	gene	GENE_num	GENE	GO_num	GO	KEGG
Pa2	34401006	Pm008595	1	IPR003213; Cytochrome c oxidase, subunit VIb	2	GO:0004129; cytochrome-c oxidase activity; Molecular Function GO:0005739; mitochondrion; Cellular Component	cytochrome C oxidase polypeptide vib, putative (EC:1.9.3.1); K02267 cytochrome c oxidase subunit VIb [EC:1.9.3.1]
Pa2	34401006	Pm008596	NA	NA	NA	NA	NA
Pa2	35818600	Pm008760	11	IPR000695; ATPase, P-type, H+ transporting proton pump IPR001757; ATPase, P-type, K/Mg/Cd/Cu/Zn/Na/Ca/Na/H-transporter IPR004014; ATPase, P-type cation-transporter, N-terminal IPR005834; Haloacid dehalogenase-like hydrolase IPR006534; ATPase, P-type, plasma-membrane proton-efflux IPR008250; ATPase, P-type, ATPase-associated domain IPR018303; ATPase, P-type phosphorylation site IPR023214; HAD-like…	10	GO:0003824; catalytic activity; Molecular Function GO:0005524; ATP binding; Molecular Function GO:0006754; ATP biosynthetic process; Biological Process GO:0006812; cation transport; Biological Process GO:0008152; metabolic process; Biological Process GO:0015662; ATPase activity, coupled to transmembrane movement of ions, phosphorylative mechanism; Molecular Function GO:0016020; membrane; Cellular…	hypothetical protein LOC100242786; K01535 H+-transporting ATPase [EC:3.6.3.6]
Pa2	36067508	Pm008787	4	IPR003961; Fibronectin, type III IPR004082; Protein of unknown function DUF1423, plant IPR008957; Fibronectin type III domain IPR013783; Immunoglobulin-like fold	1	GO:0005515; protein binding; Molecular Function	NA
Pa7	9789772	Pm023995	1	IPR004864; Late embryogenesis abundant protein, group 2	NA	NA	NA

## Sheet: I-Timing
PmID	PmPosition	gene	GENE_num	GENE	GO_num	GO	KEGG
Pa1	6415934	Pm001020	3	IPR011016; Zinc finger, RING-CH-type IPR013083; Zinc finger, RING/FYVE/PHD-type IPR018957; Zinc finger, C3HC4 RING-type	1	GO:0008270; zinc ion binding; Molecular Function	hypothetical protein LOC100015408; K10662 E3 ubiquitin-protein ligase MARCH7 [EC:6.3.2.19]
Pa2	36251343	Pm008798	NA	NA	NA	NA	NA
Pa2	36251343	Pm008799	2	IPR012000; Thiamine pyrophosphate enzyme, central domain IPR012001; Thiamine pyrophosphate enzyme, N-terminal TPP-binding domain	2	GO:0000287; magnesium ion binding; Molecular Function GO:0030976; thiamine pyrophosphate binding; Molecular Function	pyruvate decarboxylase (EC:4.1.1.1); K01568 pyruvate decarboxylase [EC:4.1.1.1]
Pa7	15635506	Pm025028	1	IPR004333; Transcription factor, SBP-box	2	GO:0003677; DNA binding; Molecular Function GO:0005634; nucleus; Cellular Component	NA
Pa7	15831939	Pm025066	NA	NA	NA	NA	NA

## Sheet: J-Shoot Length
PmID	PmPosition	gene	GENE_num	GENE	GO_num	GO	KEGG
Pa5	19883247	Pm018661	NA	NA	NA	NA	NA
Pa5	19883247	Pm018662	NA	NA	NA	NA	NA
Pa5	23797369	Pm019418	3	IPR001092; Helix-loop-helix DNA-binding domain IPR011598; Helix-loop-helix DNA-binding IPR015660; Achaete-scute transcription factor-related	4	GO:0003677; DNA binding; Molecular Function GO:0005634; nucleus; Cellular Component GO:0030528; transcription regulator activity; Molecular Function GO:0045449; regulation of transcription; Biological Process	NA
Pa5	23797369	Pm019419	3	IPR001092; Helix-loop-helix DNA-binding domain IPR011598; Helix-loop-helix DNA-binding IPR015660; Achaete-scute transcription factor-related	4	GO:0003677; DNA binding; Molecular Function GO:0005634; nucleus; Cellular Component GO:0030528; transcription regulator activity; Molecular Function GO:0045449; regulation of transcription; Biological Process	NA

[truncated: 1 more sheets: K-Shoot Diameter]
